# Supplementary material for: Genetic analysis of Upland cotton dynamic heterosis for boll number per plant at multiple developmental stages
Source: PubMed Central journal article supplement (PMC5066282; doi:10.1038/srep35515), 2016-10-17
Supplement: srep35515-s1.pdf [file srep35515-s1.pdf]

**Genetic analysis of Upland cotton dynamic heterosis for boll  
number per plant at multiple developmental stages**

Liangang Shang<sup>1</sup>, Yumei Wang<sup>2</sup>, Shihu Cai<sup>1</sup>, Lingling Ma<sup>1</sup>, Fang Liu<sup>3</sup>, Zhiwen  
Chen<sup>1</sup>, Ying Su<sup>1</sup>, Kunbo Wang<sup>3</sup>, Jinping Hua<sup>1\*</sup>

**Table S1** The results of ANOVA of boll number per plant

| Stage     | Source of variation | XZ hybrid  |                  |         | XZV hybrid  |             |           |
|-----------|---------------------|------------|------------------|---------|-------------|-------------|-----------|
|           |                     | RIL        | BCF <sub>1</sub> | MPH     | RIL         | BC          | MPH       |
|           |                     | MS         | MS               | MS      | MS          | MS          | MS        |
| <i>t1</i> | G                   | 3.52***    | 1.76***          | 1.01*** | 3.98***     | 1.56***     | 1.44***   |
|           | E                   | 236.96***  | 358.67***        | 1.32    | 561.81***   | 1246.92***  | 53.25***  |
|           | G × E               | 0.93***    | 0.87**           | 0.84**  | 0.98***     | 0.83        | 0.92***   |
|           | error               | 0.40       | 0.66             | 0.64    | 0.42        | 0.78        | 0.68      |
| <i>t2</i> | G                   | 20.86***   | 9.40***          | 5.40    | 47.55***    | 11.62***    | 9.91***   |
|           | E                   | 9461.90*** | 11178.20***      | 2.25    | 11268.96*** | 16515.56*** | 138.08*** |
|           | G × E               | 5.15       | 4.68             | 4.77    | 8.03***     | 5.03**      | 5.50*     |
|           | error               | 4.80       | 4.47             | 4.59    | 3.90        | 3.93        | 4.49      |
| <i>t3</i> | G                   | 36.56***   | 14.96***         | 9.25**  | 98.26***    | 11.47***    | 22.76***  |
|           | E                   | 1548.03*** | 1411.14***       | 21.43*  | 3601.04***  | 3194.40***  | 191.38*** |
|           | G × E               | 9.06***    | 8.06             | 7.69    | 14.79***    | 8.46*       | 11.10***  |
|           | error               | 6.90       | 8.34             | 6.99    | 9.60        | 7.05        | 8.12      |
| <i>t4</i> | G                   | 33.35***   | 16.11***         | 11.74*  | 95.00***    | 11.96***    | 25.53***  |
|           | E                   | 2303.14*** | 2152.98***       | 37.36*  | 2884.48***  | 4371.52***  | 394.27*** |
|           | G × E               | 12.05***   | 9.11             | 10.10   | 20.72***    | 9.81*       | 12.52***  |
|           | error               | 8.38       | 10.04            | 9.22    | 8.86        | 7.86        | 9.00      |

G: Genotype, E: Environment, G × E: Genotype × Environment, Significance is shown at \*P=0.05, \*\*P=0.01, \*\*\*P=0.001, respectively.

**Table S2** QTLs identified for boll number per plant by composite interval mapping in two hybrids

| QTL                 | Stage     | Env | Marker interval |          | RIL     |       |       | BC   |       |       | MPH     |       |       | d/a  | Type |
|---------------------|-----------|-----|-----------------|----------|---------|-------|-------|------|-------|-------|---------|-------|-------|------|------|
|                     |           |     |                 |          | LOD     | A     | Var%  | LOD  | A+D   | Var%  | LOD     | D     | Var%  |      |      |
| XZ hybrid           |           |     |                 |          |         |       |       |      |       |       |         |       |       |      |      |
| <i>qBNP-Chr1-1</i>  | <i>t2</i> | E3  | SWU10930        | ICR03295 |         |       |       | 3.53 | -0.34 | 7.13  |         |       |       |      | A    |
| <i>qBNP-Chr1-2</i>  | <i>t2</i> | E3  | CGR6129         | DPL0790  |         |       |       | 4.68 | -0.39 | 9.75  |         |       |       |      | A    |
| <i>qBNP-Chr1-3</i>  | <i>t1</i> | E1  | NAU3177         | ICR03724 | 3.00    | -0.27 | 6.04  |      |       |       |         |       |       |      |      |
|                     | <i>t2</i> | E2  | NAU3177         | ICR03724 | 3.01    | -0.70 | 7.04  |      |       |       |         |       |       |      |      |
|                     | <i>t2</i> | E1  | ICR03724        | ICR03725 | 2.65    | -0.60 | 5.46  |      |       |       |         |       |       |      |      |
|                     | <i>t3</i> | E2  | ICR03724        | ICR03725 | 3.46    | -0.85 | 7.33  |      |       |       |         |       |       |      |      |
| <i>qBNP-Chr1-4</i>  | <i>t4</i> | E2  | SWU10986        | NAU2218  | 3.25    | -0.80 | 7.31  |      |       |       |         |       |       |      |      |
|                     | <i>t3</i> | E2  | SWU10986        | NAU2218  | 4.81    | -1.11 | 12.80 |      |       |       |         |       |       |      |      |
|                     | <i>t3</i> | E3  | SWU10986        | NAU2218  |         |       |       | 3.01 | -0.72 | 8.62  | (±0.39) |       | 0.35  |      | PD   |
| <i>qBNP-Chr1-5</i>  | <i>t2</i> | E2  | CGR5663         | NAU2343  |         |       |       | 3.53 | -0.57 | 7.52  |         |       |       |      | A    |
|                     | <i>t3</i> | E2  | CGR5663         | NAU2343  |         |       |       | 4.96 | -0.81 | 11.82 |         |       |       |      | A    |
|                     | <i>t4</i> | E2  | CGR5663         | NAU2343  |         |       |       | 2.77 | -0.59 | 6.12  |         |       |       |      | A    |
| <i>qBNP-Chr1-6</i>  | <i>t4</i> | E1  | SWU10994        | HAU1001  | 3.02    | -0.79 | 6.27  |      |       |       |         |       |       |      |      |
|                     | <i>t2</i> | E2  | SWU10994        | HAU1001  | 2.94    | -0.69 | 7.04  |      |       |       |         |       |       |      |      |
|                     | <i>t3</i> | E2  | SWU10994        | HAU1001  | 3.45    | -0.86 | 7.88  |      |       |       |         |       |       |      |      |
| <i>qBNP-Chr1-7</i>  | <i>t4</i> | E3  | ICR11883        | CGR6356  |         |       |       | 2.88 | -0.69 | 6.36  |         |       |       |      | A    |
|                     | <i>t4</i> | E1  | CGR6356         | SWU11632 |         |       |       | 2.80 | -0.53 | 6.04  |         |       |       |      | A    |
| <i>qBNP-Chr2-1</i>  | <i>t2</i> | E3  | SWU11889        | SWU11887 | 13.58   | 0.79  | 23.07 |      |       |       |         |       |       |      |      |
|                     | <i>t1</i> | E3  | SWU11889        | SWU11887 | 8.91    | 0.30  | 17.87 |      |       |       |         |       |       |      |      |
| <i>qBNP-Chr2-2</i>  | <i>t1</i> | E2  | SWU11887        | SWU11976 | 4.65    | 0.30  | 8.12  |      |       |       |         |       |       |      |      |
|                     | <i>t1</i> | E3  | SWU11887        | SWU11976 |         |       |       | 3.82 | 0.16  | 7.85  | (±0.14) |       | 0.47  |      | PD   |
|                     | <i>t3</i> | E3  | SWU11887        | SWU11976 | 6.92    | 1.02  | 13.10 |      |       |       |         |       |       |      |      |
|                     | <i>t1</i> | E1  | SWU11887        | SWU11976 | 6.07    | 0.40  | 14.63 |      |       |       |         |       |       |      |      |
| <i>qBNP-Chr6-1</i>  | <i>t1</i> | E1  | SWU11887        | SWU11976 |         |       |       |      |       |       | 4.31    | -0.29 | 11.46 | 0.73 | PD   |
|                     | <i>t2</i> | E3  | ICR00143        | CGR5108  |         |       |       |      |       |       | 6.28    | 0.60  | 31.83 |      | OD   |
|                     | <i>t1</i> | E3  | ICR00143        | CGR5108  |         |       |       | 2.55 | 0.25  | 17.08 |         |       |       |      | A    |
| <i>qBNP-Chr6-2</i>  | <i>t1</i> | E3  | NAU896          | BNL3650  | (±0.09) |       |       | 3.77 | -0.22 | 11.92 |         |       |       |      |      |
|                     | <i>t1</i> | E3  | BNL3650         | ICR10602 |         |       |       |      |       |       | 2.59    | -0.13 | 5.28  | 1.44 | OD   |
| <i>qBNP-Chr7-1</i>  | <i>t2</i> | E2  | SWU10064        | NAU3181  |         |       |       |      |       |       | 3.23    | 0.52  | 9.19  |      | OD   |
| <i>qBNP-Chr7-2</i>  | <i>t3</i> | E1  | HAU1483b        | Gh145    | 3.14    | 0.81  | 6.21  |      |       |       |         |       |       |      |      |
| <i>qBNP-Chr11-1</i> | <i>t1</i> | E3  | NAU5428         | Gh256    |         |       |       |      |       |       | 3.16    | -0.18 | 11.01 |      | OD   |
| <i>qBNP-Chr11-2</i> | <i>t3</i> | E2  | CER0098         | CGR5421  |         |       |       |      |       |       | 2.98    | -0.94 | 18.88 |      | OD   |
|                     | <i>t4</i> | E2  | CER0098         | CGR5421  |         |       |       |      |       |       | 2.59    | -0.83 | 14.11 |      | OD   |
|                     | <i>t4</i> | E3  | CER0098         | CGR5421  |         |       |       |      |       |       | 2.52    | -0.81 | 9.64  |      | OD   |
|                     | <i>t4</i> | E3  | CGR5421         | ICR08245 | (±0.01) |       |       | 2.88 | -0.82 | 9.30  |         |       |       |      |      |
| <i>qBNP-Chr11-3</i> | <i>t4</i> | E2  | SWU15972        | TMB0628  |         |       |       |      |       |       | 3.08    | -0.75 | 11.55 | 0.72 | PD   |

| QTL                        | Stage | Env | Marker interval |           | RIL  |       |       | BC   |       |       | MPH  |         |      | d/a | Type |
|----------------------------|-------|-----|-----------------|-----------|------|-------|-------|------|-------|-------|------|---------|------|-----|------|
|                            |       |     |                 |           | LOD  | A     | Var%  | LOD  | A+D   | Var%  | LOD  | D       | Var% |     |      |
|                            | t4    | E3  | SWU15972        | TMB0628   | 2.52 | -1.04 | 10.06 |      |       |       |      |         |      |     |      |
|                            | t1    | E3  | SWU15972        | TMB0628   | 2.70 | -0.15 | 4.93  |      |       |       |      |         |      |     |      |
| <i>qBNP-Chr11-4</i>        | t2    | E3  | SWU12282        | Gh316     | 5.69 | -0.51 | 8.99  |      |       |       |      |         |      |     |      |
| <i>qBNP-Chr12-1</i>        | t4    | E2  | HAU1316         | NAU3519   | 4.02 | -0.97 | 10.81 |      |       |       |      |         |      |     |      |
| <b><i>qBNP-Chr14-1</i></b> | t3    | E1  | Gh120           | PGML1884  |      |       |       | 3.11 | 0.53  | 6.51  |      |         |      |     | A    |
|                            | t4    | E1  | Gh120           | PGML1884  |      |       |       | 3.12 | 0.55  | 6.55  |      |         |      |     | A    |
| <i>qBNP-Chr16-1</i>        | t2    | E3  | PGML1309        | Gh137     |      |       |       | 3.12 | -0.30 | 5.91  |      |         |      |     | A    |
| <i>qBNP-Chr16-2</i>        | t1    | E2  | DPL0897         | BNL1026   |      |       |       |      |       |       | 3.44 | 0.17    | 7.72 |     | OD   |
| <i>qBNP-Chr16-3</i>        | t1    | E2  | SWU10038        | ICR00016  | 3.37 | -0.26 | 5.82  |      |       |       |      |         |      |     |      |
| <b><i>qBNP-Chr21-1</i></b> | t2    | E1  | SWU16487        | SWU16488  |      |       |       | 2.75 | -0.48 | 6.00  |      |         |      |     | A    |
|                            | t3    | E1  | SWU16487        | SWU16488  |      |       |       |      |       |       | 2.59 | -0.52   | 5.62 |     | OD   |
| <b><i>qBNP-Chr21-2</i></b> | t1    | E1  | JESPR154        | SWU14431a | 4.09 | -0.30 | 7.56  |      |       |       |      |         |      |     |      |
|                            | t1    | E2  | JESPR154        | SWU14431a | 3.90 | -0.29 | 7.26  |      |       |       |      |         |      |     |      |
| <b><i>qBNP-Chr21-3</i></b> | t1    | E1  | SWU15915        | SWU0189   | 5.65 | -0.34 | 10.38 |      |       |       |      |         |      |     |      |
|                            | t1    | E2  | SWU15915        | SWU0189   | 6.72 | -0.38 | 12.27 |      |       |       |      |         |      |     |      |
|                            | t2    | E3  | SWU15915        | SWU0189   | 3.35 | -0.37 | 5.02  |      |       |       |      |         |      |     |      |
|                            | t3    | E3  | SWU15915        | SWU0189   | 5.18 | -1.39 | 9.96  |      |       |       |      |         |      |     |      |
| <b><i>qBNP-Chr21-4</i></b> | t1    | E3  | SWU0189         | DPL0050a  | 3.16 | -0.17 | 6.02  |      |       |       |      |         |      |     |      |
|                            | t1    | E1  | SWU0189         | DPL0050a  | 4.21 | -0.34 | 10.06 |      |       |       |      |         |      |     |      |
| <b><i>qBNP-Chr21-5</i></b> | t2    | E1  | CGR5808         | HAU0423   | 4.23 | -0.89 | 12.05 |      |       |       |      |         |      |     |      |
|                            | t2    | E2  | HAU0423         | CGR5806   | 3.30 | -0.78 | 9.18  |      |       |       |      |         |      |     |      |
|                            | t3    | E1  | CGR5808         | HAU0423   | 3.12 | -0.93 | 8.25  |      |       |       |      |         |      |     |      |
|                            | t3    | E1  | HAU0423         | CGR5806   |      |       |       | 2.78 | -0.65 | 9.02  |      | (±0.28) |      | 0.3 | PD   |
| <b><i>qBNP-Chr21-6</i></b> | t2    | E2  | CGR5806         | DPL0777   |      |       |       | 5.95 | -0.94 | 19.69 |      |         |      |     | A    |
|                            | t1    | E2  | CGR5806         | DPL0777   |      |       |       | 3.18 | -0.32 | 16.91 |      |         |      |     | A    |
| <i>qBNP-Chr21-7</i>        | t3    | E1  | CGR5217         | BNL3442a  |      |       |       | 4.44 | 0.67  | 9.45  |      |         |      |     | A    |
| <b><i>qBNP-Chr22-1</i></b> | t2    | E2  | SWU21635        | SWU21646  | 2.84 | -0.61 | 5.54  |      |       |       |      |         |      |     |      |
|                            | t3    | E2  | SWU21646        | SWU21585  | 3.15 | -0.76 | 6.08  |      |       |       |      |         |      |     |      |
| <i>qBNP-Chr24-1</i>        | t1    | E3  | Gh298           | SWU13133  |      |       |       |      |       |       | 3.75 | 0.15    | 7.69 |     | OD   |
| <b><i>qBNP-Chr24-2</i></b> | t2    | E3  | SWU13150        | PGML4657  |      |       |       | 3.62 | 0.37  | 8.13  |      |         |      |     | A    |
|                            | t2    | E2  | PGML4657        | Gh454     |      |       |       | 2.97 | 0.51  | 5.62  |      |         |      |     | A    |
| <b><i>qBNP-Chr24-3</i></b> | t4    | E3  | Gh268           | SWU13268  |      |       |       | 3.68 | 0.74  | 7.47  |      |         |      |     | A    |
|                            | t2    | E3  | PGML3120        | SWU13256  |      |       |       | 6.33 | 0.45  | 12.41 |      |         |      |     | A    |
| <i>qBNP-Chr24-4</i>        | t1    | E2  | SWU13267        | BNL1521   |      |       |       | 3.63 | 0.25  | 10.94 |      |         |      |     | A    |
| <i>qBNP-Chr24-5</i>        | t4    | E2  | SWU13758        | CGR5423   | 4.57 | 0.87  | 8.97  |      |       |       |      |         |      |     |      |
| <i>qBNP-Chr26-1</i>        | t3    | E1  | HAU1571         | BNL598    | 3.82 | 0.91  | 7.79  |      |       |       |      |         |      |     |      |
| <i>qBNP-Chr26-2</i>        | t2    | E2  | SWU17233        | SWU17251  |      |       |       |      |       |       | 4.55 | 0.55    | 9.79 |     |      |
| <i>qBNP-Chr26-3</i>        | t2    | E2  | C2_0135         | PGML2321  |      |       |       | 3.96 | -0.61 | 8.15  |      |         |      |     | OD   |

| QTL                 | Stage     | Env | Marker interval |          | RIL  |       |         | BC   |       |       | MPH  |         |       | d/a  | Type |
|---------------------|-----------|-----|-----------------|----------|------|-------|---------|------|-------|-------|------|---------|-------|------|------|
|                     |           |     |                 |          | LOD  | A     | Var%    | LOD  | A+D   | Var%  | LOD  | D       | Var%  |      |      |
| XZV hybrid          |           |     |                 |          |      |       |         |      |       |       |      |         |       |      |      |
| <i>qBNP-Chr1-1</i>  | <i>t2</i> | E1  | ICR03725        | ICR03724 |      |       |         |      |       |       | 3.84 | -0.63   | 11.08 |      | OD   |
| <i>qBNP-Chr2-1</i>  | <i>t2</i> | E3  | CGR6695         | SWU11013 |      |       |         |      |       |       | 3.65 | -0.37   | 7.30  |      | OD   |
|                     | <i>t3</i> | E3  | CGR6695         | SWU11013 |      |       |         |      |       |       | 4.07 | -1.01   | 8.39  |      | OD   |
| <i>qBNP-Chr2-2</i>  | <i>t4</i> | E2  | SWU11976        | SWU12001 |      |       |         | 3.00 | -0.68 | 7.59  |      |         |       |      | A    |
| <i>qBNP-Chr3-1</i>  | <i>t2</i> | E1  | SWU12840        | NAU2742  |      |       |         |      |       |       | 5.98 | -0.92   | 16.56 |      | OD   |
| <i>qBNP-Chr10-1</i> | <i>t4</i> | E3  | NAU2139         | TMB1152  |      |       |         | 3.72 | -1.00 | 16.52 |      |         |       |      | A    |
| <i>qBNP-Chr12-1</i> | <i>t1</i> | E2  | Gh631           | COT107   |      |       |         | 2.67 | -0.22 | 5.87  |      |         |       |      |      |
|                     | <i>t1</i> | E2  | Gh631           | COT107   |      |       | (±0.03) |      |       |       | 2.85 | -0.25   | 7.74  | 8.30 | OD   |
| <i>qBNP-Chr16-1</i> | <i>t1</i> | E3  | HAU3081         | NAU747   |      |       |         | 4.64 | 0.16  | 13.45 |      |         |       |      |      |
|                     | <i>t1</i> | E3  | NAU747          | HAU1129  |      |       |         |      |       |       | 3.53 | 0.16    | 13.69 |      | OD   |
| <i>qBNP-Chr16-2</i> | <i>t1</i> | E3  | NAU747          | HAU1129  |      |       |         | 5.61 | 0.20  | 20.74 |      |         |       |      | A    |
| <i>qBNP-Chr16-3</i> | <i>t1</i> | E2  | SWU18366        | SWU18579 | 3.83 | -0.37 | 7.79    |      |       |       |      |         |       |      |      |
|                     | <i>t2</i> | E1  | SWU10266        | SWU18366 |      |       |         | 2.91 | -0.52 | 7.79  |      | (±0.53) |       | 0.50 | PD   |
|                     | <i>t2</i> | E2  | SWU18366        | SWU18579 | 2.85 | -1.05 | 5.72    |      |       |       |      |         |       |      |      |
| <i>qBNP-Chr21-1</i> | <i>t2</i> | E2  | JESPR154        | BNL5602  |      |       |         |      |       |       | 3.43 | -0.68   | 8.02  |      | OD   |
| <i>qBNP-Chr23-1</i> | <i>t2</i> | E3  | HAU1758         | SHIN1076 |      |       |         | 3.30 | -0.42 | 11.13 |      |         |       |      | A    |
|                     | <i>t3</i> | E1  | SHIN1076        | BNL3482  |      |       |         |      |       |       | 2.91 | 0.63    | 9.68  |      | OD   |
| <i>qBNP-Chr23-2</i> | <i>t1</i> | E2  | MUSB994         | NAU2238  | 2.69 | -0.37 | 8.04    |      |       |       |      |         |       |      |      |
|                     | <i>t3</i> | E1  | MUSB994         | NAU2238  |      |       |         | 2.96 | -0.61 | 9.16  |      | (±0.64) |       | 0.51 | PD   |
|                     | <i>t3</i> | E1  | MUSB994         | NAU2238  | 4.91 | -1.25 | 16.00   |      |       |       |      |         |       |      |      |
| <i>qBNP-Chr23-3</i> | <i>t4</i> | E1  | MUSB994         | NAU2238  |      |       |         | 3.35 | -0.68 | 10.59 |      |         |       |      | A    |
|                     | <i>t1</i> | E2  | NAU2238         | NAU3588  |      |       |         | 5.74 | -0.32 | 12.76 |      | (±0.12) |       | 0.27 | PD   |
|                     | <i>t1</i> | E2  | NAU3588         | NAU5373a | 5.80 | -0.44 | 11.45   |      |       |       |      |         |       |      |      |
|                     | <i>t2</i> | E1  | NAU3588         | NAU5373a | 5.01 | -1.00 | 9.71    |      |       |       |      |         |       |      |      |
|                     | <i>t2</i> | E1  | NAU3588         | NAU5373a |      |       |         | 3.59 | -0.50 | 7.34  |      | (±0.50) |       | 0.50 | PD   |
|                     | <i>t2</i> | E2  | NAU3588         | NAU5373a | 5.93 | -1.51 | 11.93   |      |       |       |      |         |       |      |      |
|                     | <i>t3</i> | E1  | NAU3588         | NAU5373a |      |       |         | 5.80 | -0.71 | 12.16 |      | (±0.48) |       | 0.40 | PD   |
|                     | <i>t3</i> | E1  | NAU3588         | NAU5373a | 7.00 | -1.19 | 14.52   |      |       |       |      |         |       |      |      |
|                     | <i>t3</i> | E2  | NAU3588         | NAU5373a | 2.68 | -1.17 | 5.56    |      |       |       |      |         |       |      |      |
|                     | <i>t4</i> | E1  | NAU2238         | NAU3588  | 4.30 | -0.83 | 10.05   |      |       |       |      |         |       |      |      |
|                     | <i>t4</i> | E1  | NAU3588         | NAU5373a |      |       |         | 4.52 | -0.64 | 9.63  |      | (±0.19) |       | 0.23 | PD   |

| QTL                        | Stage     | Env | Marker interval |          | RIL  |         |      | BC   |       |       | MPH  |       |       | d/a  | Type |
|----------------------------|-----------|-----|-----------------|----------|------|---------|------|------|-------|-------|------|-------|-------|------|------|
|                            |           |     |                 |          | LOD  | A       | Var% | LOD  | A+D   | Var%  | LOD  | D     | Var%  |      |      |
|                            | <i>t4</i> | E2  | NAU3588         | NAU5373a | 2.81 | -1.19   | 5.94 |      |       |       |      |       |       |      |      |
| <i>qBNP-Chr23-4</i>        | <i>t3</i> | E1  | NAU5373b        | HAU2648  |      |         |      | 5.01 | -0.82 | 16.83 |      |       |       |      | A    |
| <i>qBNP-Chr24-1</i>        | <i>t1</i> | E3  | PGML1207        | Gh54     |      |         |      | 4.00 | 0.16  | 13.88 |      |       |       |      | A    |
| <b><i>qBNP-Chr24-2</i></b> | <i>t3</i> | E2  | Gh54            | Gh454    |      |         |      |      |       |       | 3.92 | 0.92  | 9.13  |      | OD   |
|                            | <i>t2</i> | E3  | Gh454           | HAU3076  |      |         |      | 4.02 | 0.38  | 8.39  |      |       |       |      | A    |
| <i>qBNP-Chr24-3</i>        | <i>t3</i> | E2  | HAU3076         | SWU13121 |      |         |      |      |       |       | 3.60 | -0.87 | 8.02  |      | OD   |
| <i>qBNP-Chr25-1</i>        | <i>t1</i> | E3  | SWU19676        | NAU2968  | 3.07 | 0.11    | 6.29 |      |       |       |      |       |       |      |      |
| <b><i>qBNP-Chr25-2</i></b> | <i>t2</i> | E2  | NAU2968         | DPL0377  |      | (±0.40) |      |      |       |       | 3.70 | 0.68  | 8.20  | 1.70 | OD   |
|                            | <i>t2</i> | E2  | NAU2968         | DPL0377  |      |         |      | 6.64 | 1.08  | 18.65 |      |       |       |      |      |
| <i>qBNP-Chr25-3</i>        | <i>t2</i> | E2  | SWU19413        | SWU19431 |      |         |      | 7.96 | 1.01  | 16.19 |      |       |       |      | A    |
| <b><i>qBNP-Chr26-1</i></b> | <i>t4</i> | E1  | DPL0057         | NAU3109  |      |         |      | 2.78 | -0.49 | 5.97  |      |       |       |      | A    |
|                            | <i>t1</i> | E2  | NAU3109         | CGR6772  |      |         |      |      |       |       | 2.65 | 0.28  | 9.60  |      | OD   |
| <b><i>qBNP-Chr26-2</i></b> | <i>t3</i> | E1  | HAU0355         | SWU16777 |      |         |      | 3.74 | -0.61 | 8.95  |      |       |       |      | A    |
|                            | <i>t3</i> | E3  | HAU0355         | SWU16777 |      |         |      |      |       |       | 4.81 | -1.26 | 11.27 | 0.69 | PD   |
|                            | <i>t3</i> | E3  | SWU16777        | SWU16780 | 4.14 | 1.82    | 8.74 |      |       |       |      |       |       |      |      |
|                            | <i>t4</i> | E3  | SWU16777        | SWU16780 |      |         |      |      |       |       | 2.87 | -1.03 | 6.29  | 0.53 | PD   |
|                            | <i>t4</i> | E3  | SWU16777        | SWU16780 | 3.81 | 1.94    | 8.31 |      |       |       |      |       |       |      |      |

Bold figures indicate the QTL was detected in more than one environments, stages or populations simultaneously

Env., environment, E1: Handan; E2: Cangzhou; E3: Xiangyang

Effect, the genetic expectation of a QTL effect obtained is the additive effect (A) when estimated from the RILs and RIL's, the additive and dominance effects (A+D) from the BCF<sub>1</sub> mean values, and the dominance effect (D) from the MPH values

Var%, phenotypic variation explained by a single QTL

d/a, dominance ratio

Type, The QTLs which were identified in backcross population were grouped into three types: (A) additive effect, (PD) partial dominance effect, (OD) overdominance effect.

**Table S3** Conditional QTL identified for boll number per plant of RIL(V) and BC(V) populations by composite interval mapping

| QTL                 | Env | Stage         | Marker interval |          | RIL   |       |       | BC   |       |       | MPH   |       |      |
|---------------------|-----|---------------|-----------------|----------|-------|-------|-------|------|-------|-------|-------|-------|------|
|                     |     |               |                 |          | LOD   | A     | Var%  | LOD  | A+D   | Var%  | LOD   | D     | Var% |
| XZ hybrid           |     |               |                 |          |       |       |       |      |       |       |       |       |      |
| <i>qBNP-Chr1-1</i>  | E2  | $\Delta$ t1-2 | SWU10912        | DPL0090  | 3.22  | -0.61 | 9.47  |      |       |       |       |       |      |
|                     | E2  | $\Delta$ t3-4 | DPL0090         | Gh398    |       |       |       |      |       | 3.85  | 0.51  | 8.51  |      |
| <i>qBNP-Chr1-2</i>  | E3  | $\Delta$ t1-2 | CGR6129         | DPL0790  |       |       |       | 4.72 | -0.31 | 10.47 |       |       |      |
| <i>qBNP-Chr1-4</i>  | E2  | $\Delta$ t1-2 | CGR5663         | NAU2343  |       |       |       | 3.54 | -0.47 | 7.25  |       |       |      |
|                     | E2  | $\Delta$ t3-4 | SWU0077         | HAU1417  | 2.83  | 0.33  | 5.92  |      |       |       |       |       |      |
| <i>qBNP-Chr1-5</i>  | E1  | $\Delta$ t2-3 | ICR11883        | CGR6356  | 3.14  | 0.40  | 6.48  |      |       |       |       |       |      |
| <i>qBNP-Chr2-1</i>  | E3  | $\Delta$ t1-2 | SWU11889        | SWU11887 | 10.42 | 0.53  | 18.89 |      |       |       |       |       |      |
| <i>qBNP-Chr2-2</i>  | E2  | $\Delta$ t2-3 | Gh64            | SWU17257 | 3.11  | -0.65 | 13.15 |      |       |       |       |       |      |
|                     | E2  | $\Delta$ t1-2 | SWU17233        | SWU17251 |       |       |       |      |       | 4.75  | 0.53  | 10.25 |      |
| <i>qBNP-Chr5-1</i>  | E3  | $\Delta$ t2-3 | SWU20917        | NAU6240  | 3.27  | -0.52 | 6.97  |      |       |       |       |       |      |
|                     | E3  | $\Delta$ t1-2 | NAU6240         | PGML1671 | 2.63  | 0.34  | 7.83  |      |       |       |       |       |      |
| <i>qBNP-Chr5-2</i>  | E2  | $\Delta$ t3-4 | CGR5025         | NBRI0694 | 2.53  | 0.31  | 5.27  |      |       |       |       |       |      |
|                     | E2  | $\Delta$ t2-3 | NBRI0694        | DPL0022  | 3.13  | -0.46 | 6.38  |      |       |       |       |       |      |
| <i>qBNP-Chr5-3</i>  | E1  | $\Delta$ t1-2 | SWU17787        | SWU13378 |       |       |       | 3.08 | -0.43 | 6.79  |       |       |      |
|                     | E1  | $\Delta$ t1-2 | SWU17787        | SWU13378 | 2.56  | -0.46 | 5.00  |      |       |       |       |       |      |
| <i>qBNP-Chr7-1</i>  | E2  | $\Delta$ t1-2 | SWU10064        | NAU3181  |       |       |       |      |       | 3.95  | 0.55  | 11.42 |      |
| <i>qBNP-Chr7-2</i>  | E1  | $\Delta$ t1-2 | SWU10205        | HAU1483a | 3.51  | 0.62  | 9.21  |      |       |       |       |       |      |
| <i>qBNP-Chr9-1</i>  | E2  | $\Delta$ t3-4 | CGR5867         | SWU15407 |       |       |       | 2.99 | -0.38 | 6.45  |       |       |      |
|                     | E2  | $\Delta$ t3-4 | NAU3052         | NAU5474  |       |       |       | 4.05 | -0.44 | 8.74  |       |       |      |
| <i>qBNP-Chr11-1</i> | E3  | $\Delta$ t1-2 | SWU12282        | Gh316    | 4.33  | -0.35 | 7.64  |      |       |       |       |       |      |
| <i>qBNP-Chr13-1</i> | E3  | $\Delta$ t2-3 | NAU2893         | Gh157    |       |       |       |      |       | 4.07  | 0.46  | 8.85  |      |
| <i>qBNP-Chr13-2</i> | E1  | $\Delta$ t1-2 | Gh157           | BNL1495  |       |       |       |      |       | 3.70  | 0.55  | 7.91  |      |
| <i>qBNP-Chr13-3</i> | E1  | $\Delta$ t1-2 | BNL1495         | CGR5390  |       |       |       |      |       | 3.37  | 0.55  | 10.27 |      |
| <i>qBNP-Chr14-1</i> | E3  | $\Delta$ t2-3 | SWU14543        | ICR12037 | 3.28  | 0.51  | 6.87  |      |       |       |       |       |      |
| <i>qBNP-Chr14-2</i> | E3  | $\Delta$ t1-2 | ICR12037        | CGR5675  |       |       |       | 5.00 | 0.38  | 14.98 |       |       |      |
| <i>qBNP-Chr14-3</i> | E3  | $\Delta$ t1-2 | PGML1368        | PGML1568 |       |       |       | 4.14 | 0.29  | 8.42  |       |       |      |
| <i>qBNP-Chr14-4</i> | E3  | $\Delta$ t3-4 | CIR228          | BNL2485  |       |       |       |      |       | 4.35  | 0.68  | 9.05  |      |
| <i>qBNP-Chr16-1</i> | E3  | $\Delta$ t3-4 | SWU10214        | Gh56     | 4.62  | -0.74 | 11.35 |      |       |       |       |       |      |
| <i>qBNP-Chr16-2</i> | E3  | $\Delta$ t2-3 | SWU10037        | ICR00010 |       |       |       | 4.00 | 0.58  | 8.09  |       |       |      |
| <i>qBNP-Chr21-1</i> | E1  | $\Delta$ t1-2 | SWU16487        | SWU16488 |       |       |       |      |       | 2.98  | -0.38 | 6.34  |      |
|                     | E2  | $\Delta$ t3-4 | SWU16487        | SWU16488 |       |       |       | 2.53 | -0.41 | 7.28  |       |       |      |
| <i>qBNP-Chr21-2</i> | E3  | $\Delta$ t2-3 | CGR5602         | JESPR154 |       |       |       | 4.53 | -0.67 | 9.19  |       |       |      |
| <i>qBNP-Chr21-3</i> | E3  | $\Delta$ t2-3 | SWU14431a       | SWU15915 |       |       |       | 4.18 | -0.73 | 10.12 |       |       |      |
| <i>qBNP-Chr21-4</i> | E2  | $\Delta$ t1-2 | CGR5806         | DPL0777  |       |       |       | 3.85 | -0.63 | 12.77 |       |       |      |
| <i>qBNP-Chr22-1</i> | E2  | $\Delta$ t1-2 | SWU21646        | SWU21585 | 4.48  | -0.60 | 8.97  |      |       |       |       |       |      |

|                            |    |               |          |          |       |       |       |      |       |       |       |       |
|----------------------------|----|---------------|----------|----------|-------|-------|-------|------|-------|-------|-------|-------|
| <i>qBNP-Chr24-1</i>        | E3 | $\Delta t3-4$ | CGR5202  | Gh298    |       |       |       |      | 3.10  | -0.57 | 6.30  |       |
| <i>qBNP-Chr24-2</i>        | E3 | $\Delta t1-2$ | PGML3120 | SWU13256 |       |       |       | 4.78 | 0.31  | 9.70  |       |       |
| <i>qBNP-Chr24-3</i>        | E3 | $\Delta t1-2$ | SWU13267 | BNL1521  |       |       |       | 4.67 | 0.39  | 16.58 |       |       |
| <i>qBNP-Chr25-1</i>        | E1 | $\Delta t1-2$ | SWU19763 | SWU19129 | 3.32  | 0.62  | 9.05  |      |       |       |       |       |
| <i>qBNP-Chr26-1</i>        | E1 | $\Delta t3-4$ | HAU1571  | BNL598   |       |       |       | 3.34 | -0.29 | 7.58  |       |       |
| <i>qBNP-Chr26-2</i>        | E1 | $\Delta t3-4$ | SWU17467 | SWU17419 |       |       |       | 4.28 | -0.32 | 9.48  |       |       |
| <i>qBNP-Chr26-3</i>        | E2 | $\Delta t1-2$ | PGML1833 | SWU0514  |       |       |       | 3.20 | -0.43 | 6.15  |       |       |
| XZV hybrid                 |    |               |          |          |       |       |       |      |       |       |       |       |
| <b><i>qBNP-Chr1-1</i></b>  | E1 | $\Delta t1-2$ | ICR03725 | ICR03724 |       |       |       |      |       | 2.64  | -0.44 | 7.83  |
|                            | E1 | $\Delta t1-2$ | ICR03725 | ICR03724 |       |       |       | 2.83 | -0.49 | 9.95  |       |       |
| <b><i>qBNP-Chr2-1</i></b>  | E3 | $\Delta t1-2$ | DPL0217  | CGR6695  |       |       |       |      |       | 3.09  | -0.29 | 6.77  |
|                            | E3 | $\Delta t2-3$ | CGR6695  | SWU11013 |       |       |       |      |       | 2.58  | -0.65 | 5.74  |
| <i>qBNP-Chr10-1</i>        | E2 | $\Delta t2-3$ | NAU4967  | SWU19932 |       |       |       |      |       | 3.18  | -0.93 | 19.67 |
| <i>qBNP-Chr12-1</i>        | E3 | $\Delta t1-2$ | HAU3373  | CGR6847  |       |       |       |      |       | 3.33  | -0.29 | 6.73  |
| <b><i>qBNP-Chr23-1</i></b> | E1 | $\Delta t2-3$ | CGR5158  | HAU1758  |       |       |       | 4.17 | 0.42  | 9.17  |       |       |
|                            | E2 | $\Delta t3-4$ | CGR5158  | HAU1758  | 2.56  | 0.32  | 4.57  |      |       |       |       |       |
| <i>qBNP-Chr23-2</i>        | E3 | $\Delta t3-4$ | Gh327    | ICR06429 | 4.12  | 0.73  | 12.26 |      |       |       |       |       |
| <i>qBNP-Chr23-3</i>        | E2 | $\Delta t3-4$ | NAU2140  | DC40286  | 11.46 | 0.80  | 30.85 |      |       |       |       |       |
| <b><i>qBNP-Chr23-4</i></b> | E1 | $\Delta t1-2$ | NAU3588  | NAU5373a | 3.93  | -0.71 | 7.55  |      |       |       |       |       |
|                            | E2 | $\Delta t1-2$ | NAU3588  | NAU5373a | 5.22  | -1.12 | 10.90 |      |       |       |       |       |
| <i>qBNP-Chr25-1</i>        | E2 | $\Delta t2-3$ | SWU19676 | NAU2968  |       |       |       | 4.14 | -0.73 | 11.54 |       |       |
| <b><i>qBNP-Chr25-2</i></b> | E2 | $\Delta t1-2$ | NAU2968  | DPL0377  |       |       |       | 5.12 | 0.83  | 16.06 |       |       |
|                            | E2 | $\Delta t3-4$ | DPL0377  | SWU19413 |       |       |       | 3.21 | -0.39 | 8.02  |       |       |
| <b><i>qBNP-Chr25-3</i></b> | E1 | $\Delta t1-2$ | DPL0377  | SWU19413 |       |       |       | 3.77 | 0.46  | 8.70  |       |       |
|                            | E2 | $\Delta t1-2$ | SWU19413 | SWU19431 |       |       |       | 6.68 | 0.79  | 14.25 |       |       |
|                            | E1 | $\Delta t3-4$ | SWU19413 | SWU19431 | 5.15  | -0.51 | 11.12 |      |       |       |       |       |
| <i>qBNP-Chr25-4</i>        | E2 | $\Delta t1-2$ | SWU19412 | NAU3112  |       |       |       | 5.04 | 0.86  | 16.97 |       |       |
| <i>qBNP-Chr25-5</i>        | E2 | $\Delta t2-3$ | DPL0270  | SWU16437 | 3.94  | 0.74  | 13.89 |      |       |       |       |       |
| <b><i>qBNP-Chr26-1</i></b> | E3 | $\Delta t2-3$ | SWU16777 | SWU16780 | 3.41  | 1.21  | 7.24  |      |       |       |       |       |
|                            | E3 | $\Delta t2-3$ | SWU16777 | SWU16780 |       |       |       |      |       | 5.00  | -0.93 | 10.72 |

Bold figures indicate the conditional QTL was detected in more than one environments, stages or populations simultaneously

Env., Environment, E1: Handan; E2: Cangzhou; E3: Xiangyang

Effect, the genetic expectation of a QTL effect obtained is the additive effect (A) when estimated from the RILs and RIL's, the additive and dominance effects (A+D) from the BCF<sub>1</sub> mean values, and the dominance effect (D) from the MPH values

Var%, phenotypic variation explained by a single QTL



**Table S4** Summary of QTL and conditional QTL detected at different stages

|               | XZ hybrid |    |     | XZV hybrid |    |     |
|---------------|-----------|----|-----|------------|----|-----|
|               | RIL       | BC | MPH | RIL        | BC | MPH |
| <i>t1</i>     | 12        | 5  | 5   | 4          | 5  | 3   |
| <i>t2</i>     | 9         | 10 | 3   | 3          | 6  | 5   |
| <i>t3</i>     | 9         | 5  | 2   | 4          | 4  | 5   |
| <i>t4</i>     | 5         | 6  | 3   | 3          | 5  | 1   |
| $\Delta t1-2$ | 8         | 9  | 5   | 2          | 5  | 3   |
| $\Delta t2-3$ | 5         | 3  | 1   | 2          | 2  | 3   |
| $\Delta t3-4$ | 3         | 5  | 3   | 4          | 1  | 0   |

**Table S5** Main effects and environmental interactions detected for boll number per plant in RIL and RILV

populations by inclusive composite interval mapping

| Stage          | Chi. | Position | Flanking markers   | LOD   | V(A)  | V(AE) | A     | AE1   | AE2   | AE3   |  |
|----------------|------|----------|--------------------|-------|-------|-------|-------|-------|-------|-------|--|
| RIL population |      |          |                    |       |       |       |       |       |       |       |  |
| <i>t1</i>      | 1    | 24       | SWU10930 ICR03295  | 3.82  | 2.16  | 0.09  | -0.14 | 0.01  | -0.04 | 0.02  |  |
|                | 1    | 35       | NAU3177 ICR03724   | 4.24  | 2.51  | 0.33  | -0.15 | -0.07 | 0.00  | 0.07  |  |
|                | 2    | 41       | SWU11889 SWU11887  | 15.60 | 10.19 | 0.20  | 0.30  | 0.05  | -0.01 | -0.05 |  |
|                | 6    | 46       | CGR5108 ICR03206   | 2.62  | 1.48  | 0.25  | 0.12  | -0.01 | 0.06  | -0.05 |  |
|                | 9    | 197      | SWU15157 SWU14934  | 2.50  | 1.55  | 0.06  | -0.12 | -0.01 | -0.02 | 0.03  |  |
|                | 11   | 201      | NAU1014 ICR10344   | 3.84  | 1.60  | 0.20  | -0.12 | 0.06  | -0.01 | -0.04 |  |
|                | 12   | 59       | Gh631 HAU1321      | 3.48  | 1.63  | 0.99  | -0.12 | -0.01 | -0.11 | 0.12  |  |
|                | 14   | 51       | BNL3661 PGML2498   | 2.57  | 1.50  | 0.42  | 0.12  | 0.06  | 0.02  | -0.08 |  |
|                | 16   | 163      | SWU10038 ICR00016  | 3.40  | 0.98  | 1.54  | -0.09 | 0.03  | -0.16 | 0.12  |  |
|                | 18   | 112      | NAU748 SWU22192    | 2.59  | 1.46  | 0.18  | -0.11 | -0.01 | -0.05 | 0.05  |  |
|                | 21   | 157      | SWU15915 SWU0189   | 12.39 | 8.04  | 1.01  | -0.27 | -0.06 | -0.08 | 0.14  |  |
|                | 24   | 34       | SWU13267 BNL1521   | 2.95  | 1.85  | 0.18  | 0.13  | 0.04  | 0.02  | -0.05 |  |
| <i>t2</i>      | 1    | 29       | CGR6129 DPL0790    | 2.78  | 1.81  | 0.29  | -0.31 | -0.17 | 0.05  | 0.12  |  |
|                | 1    | 48       | SWU10986 NAU2218   | 5.73  | 4.12  | 1.42  | -0.46 | -0.09 | -0.28 | 0.37  |  |
|                | 1    | 165      | SWU0077 HAU1417    | 3.19  | 1.58  | 0.04  | -0.29 | 0.05  | -0.06 | 0.01  |  |
|                | 2    | 40       | SWU11889 SWU11887  | 13.90 | 4.94  | 0.69  | 0.51  | 0.01  | -0.24 | 0.23  |  |
|                | 5    | 35       | NAU6240 PGML1671   | 2.74  | 0.62  | 0.22  | 0.18  | 0.00  | -0.13 | 0.13  |  |
|                | 11   | 197      | NAU1014 ICR10344   | 2.58  | 1.66  | 0.84  | -0.29 | -0.17 | -0.12 | 0.29  |  |
|                | 12   | 60       | HAU1316 NAU3519    | 2.76  | 1.59  | 1.02  | -0.29 | -0.13 | -0.19 | 0.32  |  |
|                | 18   | 118      | SWU22192 DPL0864   | 3.39  | 2.47  | 0.56  | -0.36 | -0.10 | -0.14 | 0.24  |  |
|                | 21   | 156      | SWU14431a SWU15915 | 5.01  | 2.11  | 0.58  | -0.34 | -0.20 | 0.23  | -0.03 |  |
|                | 21   | 185      | CGR5808 HAU0423    | 6.19  | 4.13  | 1.67  | -0.47 | -0.15 | -0.27 | 0.41  |  |
|                | 22   | 1        | SWU21635 SWU21646  | 3.72  | 2.42  | 0.40  | -0.35 | 0.01  | -0.18 | 0.17  |  |
|                | 24   | 35       | SWU13267 BNL1521   | 3.12  | 1.68  | 0.08  | 0.29  | -0.05 | 0.09  | -0.04 |  |
|                | 25   | 19       | CGR6864 SWU19815   | 2.51  | 1.36  | 0.66  | -0.27 | 0.12  | -0.26 | 0.14  |  |
|                | 26   | 28       | NAU2175 SWU17336   | 2.62  | 1.86  | 0.29  | 0.31  | 0.14  | 0.01  | -0.15 |  |
|                | 27   | 4        | SWU10994 HAU1001   | 4.70  | 3.04  | 1.11  | -0.40 | -0.18 | -0.15 | 0.34  |  |
| <i>t3</i>      | 1    | 25       | CGR6129 DPL0790    | 2.80  | 2.06  | 0.02  | -0.43 | -0.06 | 0.03  | 0.03  |  |
|                | 1    | 49       | SWU10986 NAU2218   | 5.32  | 3.67  | 0.41  | -0.58 | -0.04 | -0.21 | 0.25  |  |
|                | 2    | 42       | SWU11887 SWU11976  | 7.18  | 3.88  | 1.16  | 0.59  | 0.05  | -0.42 | 0.37  |  |
|                | 7    | 88       | Gh474 SWU10785     | 2.52  | 1.56  | 0.68  | 0.38  | 0.35  | -0.18 | -0.17 |  |
|                | 11   | 199      | NAU1014 ICR10344   | 6.15  | 3.45  | 0.59  | -0.56 | 0.13  | 0.20  | -0.33 |  |
|                | 12   | 77       | HAU1316 NAU3519    | 2.54  | 1.25  | 1.06  | -0.34 | -0.43 | 0.16  | 0.28  |  |
|                | 14   | 53       | CGR6784 NAU874     | 3.83  | 2.76  | 0.03  | 0.50  | 0.01  | 0.06  | -0.07 |  |
|                | 14   | 77       | SWU14543 ICR12037  | 3.06  | 1.97  | 0.04  | 0.42  | -0.08 | 0.02  | 0.06  |  |

| Stage     | Chi.            | Position | Flanking markers |           | LOD      | V(A) | V(AE) | A     | AE1   | AE2   | AE3   |       |
|-----------|-----------------|----------|------------------|-----------|----------|------|-------|-------|-------|-------|-------|-------|
| <i>t4</i> | 19              | 120      | SWU14431<br>b    | SWU17782  | 3.43     | 2.50 | 0.20  | -0.48 | -0.19 | 0.11  | 0.08  |       |
|           | 20              | 138      | DPL0319          | HAU1378   | 3.28     | 2.43 | 0.22  | -0.47 | -0.20 | 0.07  | 0.13  |       |
|           | 21              | 157      | SWU15915         | SWU0189   | 3.92     | 2.60 | 0.18  | -0.49 | -0.08 | 0.18  | -0.10 |       |
|           | 21              | 184      | CGR5808          | HAU0423   | 3.85     | 2.72 | 0.35  | -0.50 | -0.25 | 0.11  | 0.15  |       |
|           | 22              | 1        | SWU21635         | SWU21646  | 3.59     | 2.14 | 0.40  | -0.44 | 0.16  | -0.27 | 0.10  |       |
|           | 23              | 8        | Gh327            | SWU14770  | 4.34     | 2.85 | 0.58  | -0.51 | -0.21 | -0.11 | 0.32  |       |
|           | 25              | 46       | BNL3594          | DPL0282   | 2.71     | 1.85 | 0.12  | -0.41 | -0.08 | -0.07 | 0.15  |       |
|           | 26              | 2        | HAU1571          | BNL598    | 3.63     | 2.36 | 0.68  | 0.46  | 0.29  | 0.03  | -0.32 |       |
|           | 27              | 0        | SWU10994         | HAU1001   | 6.01     | 4.19 | 0.56  | -0.62 | -0.10 | -0.21 | 0.31  |       |
|           | 1               | 48       | SWU10986         | NAU2218   | 6.56     | 4.67 | 0.15  | -0.67 | 0.16  | -0.12 | -0.04 |       |
|           | 2               | 41       | SWU11889         | SWU11887  | 3.56     | 1.19 | 1.72  | 0.34  | 0.08  | -0.53 | 0.45  |       |
|           | 3               | 119      | SWU12765         | NAU3839   | 2.51     | 1.73 | 0.17  | 0.41  | 0.17  | -0.13 | -0.04 |       |
|           | 5               | 115      | TMB1296          | HAU1603   | 2.56     | 1.22 | 1.08  | -0.34 | 0.03  | 0.38  | -0.41 |       |
|           | 5               | 136      | SWU17787         | SWU13378  | 2.87     | 2.04 | 0.27  | -0.44 | -0.13 | 0.23  | -0.10 |       |
|           | 11              | 199      | NAU1014          | ICR10344  | 3.19     | 2.03 | 0.58  | -0.44 | 0.19  | 0.14  | -0.33 |       |
|           | 12              | 59       | Gh631            | HAU1321   | 3.29     | 1.52 | 0.57  | -0.38 | 0.13  | -0.33 | 0.19  |       |
|           | 19              | 116      | PGML4342         | SWU14431b | 2.93     | 2.02 | 0.00  | -0.44 | -0.02 | -0.01 | 0.03  |       |
|           | 20              | 138      | DPL0319          | HAU1378   | 2.90     | 1.80 | 0.32  | -0.41 | -0.25 | 0.12  | 0.13  |       |
|           | 22              | 2        | SWU21646         | SWU21585  | 4.71     | 3.49 | 0.11  | -0.58 | 0.10  | 0.04  | -0.14 |       |
|           | 24              | 86       | SWU13745         | Gh273     | 3.98     | 1.80 | 0.86  | 0.41  | -0.35 | 0.35  | -0.01 |       |
|           | 25              | 55       | BNL3594          | DPL0282   | 2.60     | 1.84 | 0.01  | -0.42 | 0.04  | -0.03 | -0.02 |       |
|           | 27              | 0        | SWU10994         | HAU1001   | 5.15     | 3.53 | 0.51  | -0.58 | -0.31 | 0.16  | 0.15  |       |
|           | RILV population |          |                  |           |          |      |       |       |       |       |       |       |
|           | <i>t1</i>       | 15       | 5                | NAU3736   | SWU11691 | 2.88 | 1.83  | 0.83  | 0.13  | 0.04  | 0.08  | -0.13 |
|           |                 | 16       | 39               | NAU747    | HAU1129  | 2.65 | 1.18  | 0.02  | 0.11  | 0.01  | 0.01  | -0.02 |
|           |                 | 16       | 99               | SWU10266  | SWU18366 | 5.10 | 3.71  | 1.25  | -0.19 | 0.00  | -0.14 | 0.14  |
|           |                 | 21       | 57               | CGR5148   | SHIN0337 | 2.95 | 2.07  | 0.55  | 0.14  | 0.04  | 0.06  | -0.10 |
| 23        |                 | 278      | NAU2238          | NAU3588   | 8.37     | 6.39 | 2.67  | -0.25 | -0.02 | -0.19 | 0.21  |       |
| 25        |                 | 28       | SWU19676         | NAU2968   | 2.56     | 1.01 | 0.03  | 0.10  | -0.02 | 0.02  | -0.01 |       |
| 26        |                 | 52       | DC30107          | DPL0070   | 3.52     | 2.23 | 0.31  | 0.15  | 0.01  | 0.06  | -0.07 |       |
| 30        |                 | 2        | TMB1638          | CGR6812   | 2.68     | 1.80 | 0.87  | 0.13  | 0.00  | 0.11  | -0.11 |       |
| <i>t2</i> |                 | 16       | 39               | NAU747    | HAU1129  | 2.79 | 1.72  | 0.20  | 0.43  | -0.07 | 0.20  | -0.13 |
|           |                 | 16       | 100              | SWU18366  | SWU18579 | 4.64 | 3.26  | 0.94  | -0.59 | 0.06  | -0.41 | 0.36  |
|           | 23              | 278      | NAU2238          | NAU3588   | 12.54    | 8.69 | 2.90  | -0.96 | -0.22 | -0.54 | 0.76  |       |
|           | 25              | 94       | NAU3112          | NAU4964   | 2.68     | 1.61 | 0.09  | 0.41  | -0.01 | 0.13  | -0.12 |       |
|           | 26              | 52       | DC30107          | DPL0070   | 6.56     | 4.01 | 0.23  | 0.65  | 0.07  | 0.14  | -0.22 |       |
| <i>t3</i> | 15              | 0        | NAU3736          | SWU11691  | 4.33     | 2.86 | 0.12  | 0.78  | -0.20 | 0.19  | 0.01  |       |
|           | 16              | 100      | SWU18366         | SWU18579  | 4.05     | 2.89 | 0.20  | -0.79 | 0.29  | -0.17 | -0.12 |       |

| Stage     | Chi. | Position | Flanking markers  | LOD  | V(A) | V(AE) | A     | AE1   | AE2   | AE3   |
|-----------|------|----------|-------------------|------|------|-------|-------|-------|-------|-------|
|           | 23   | 278      | NAU2238 NAU3588   | 9.82 | 4.05 | 1.25  | -0.93 | -0.27 | -0.45 | 0.72  |
|           | 26   | 52       | DC30107 DPL0070   | 4.87 | 3.51 | 0.47  | 0.86  | -0.28 | -0.17 | 0.44  |
|           | 31   | 67       | HAU0355 SWU16777  | 3.30 | 2.08 | 1.68  | 0.66  | -0.68 | -0.09 | 0.77  |
|           | 31   | 87       | SWU16735 SWU16755 | 2.75 | 1.98 | 0.14  | -0.65 | 0.20  | 0.02  | -0.22 |
| <i>t4</i> | 15   | 0        | NAU3736 SWU11691  | 4.39 | 2.52 | 0.10  | 0.76  | -0.19 | 0.18  | 0.01  |
|           | 16   | 100      | SWU18366 SWU18579 | 3.22 | 2.31 | 0.41  | -0.73 | 0.43  | -0.25 | -0.18 |
|           | 23   | 91       | BNL3482 HAU0244   | 2.95 | 1.23 | 0.23  | -0.55 | 0.02  | -0.30 | 0.28  |
|           | 23   | 278      | NAU2238 NAU3588   | 6.40 | 2.07 | 0.93  | -0.69 | -0.12 | -0.49 | 0.61  |
|           | 26   | 52       | DC30107 DPL0070   | 3.96 | 2.97 | 0.48  | 0.82  | -0.42 | 0.03  | 0.39  |
|           | 31   | 67       | HAU0355 SWU16777  | 3.63 | 2.15 | 2.10  | 0.70  | -0.85 | 0.02  | 0.84  |
|           | 31   | 87       | SWU16735 SWU16755 | 2.53 | 1.94 | 0.45  | -0.66 | 0.39  | 0.00  | -0.39 |

Chi represents the linkage group number of the loci detected

Position: The scanning position in cM on the linkage group.

V(A): Phenotypic variation explained by additive and dominance effect at the current scanning position.

V(AE): Phenotypic variation explained by additive and dominance by environment effect at the current scanning position.

AE effect, the additive and dominance effect.

AE effect, the additive and dominance  $\times$  environment effect.

AE1 to AE3 represent AE effects detected in Handan, Cangzhou and Xiangyang, respectively.

**Table S6** Main effects and environmental interactions detected for boll number per plant in BCF<sub>1</sub> and BCFV<sub>1</sub>

populations by inclusive composite interval mapping

| Stage                       | Chi | Position | Flanking markers |          | LOD  | V(A) | V(AE) | A     | AE1   | AE2   | AE3   |
|-----------------------------|-----|----------|------------------|----------|------|------|-------|-------|-------|-------|-------|
| BCF <sub>1</sub> population |     |          |                  |          |      |      |       |       |       |       |       |
| <i>t</i> <sub>1</sub>       | 1   | 33       | NAU4045          | SWU10959 | 3.45 | 2.49 | 0.12  | -0.12 | -0.04 | 0.02  | 0.01  |
|                             | 2   | 41       | SWU11889         | SWU11887 | 3.55 | 1.55 | 0.34  | 0.10  | -0.06 | 0.00  | 0.05  |
|                             | 15  | 2        | DC40175          | SWU11630 | 2.61 | 0.00 | 1.30  | 0.00  | -0.07 | -0.05 | 0.12  |
|                             | 20  | 118      | SWU20035         | DPL0319  | 3.14 | 2.16 | 0.66  | -0.11 | -0.08 | 0.00  | 0.08  |
|                             | 21  | 157      | SWU15915         | SWU0189  | 2.66 | 1.78 | 0.07  | -0.10 | 0.01  | -0.03 | 0.02  |
|                             | 21  | 192      | HAU0423          | CGR5806  | 2.77 | 1.96 | 0.18  | -0.11 | -0.03 | -0.01 | 0.05  |
|                             | 24  | 33       | Gh268            | SWU13268 | 5.21 | 3.67 | 0.00  | 0.15  | 0.00  | 0.00  | -0.01 |
|                             | 25  | 17       | SWU19848         | CGR6864  | 2.81 | 2.06 | 0.38  | -0.11 | -0.06 | 0.00  | 0.06  |
| <i>t</i> <sub>2</sub>       | 1   | 30       | CGR6129          | DPL0790  | 4.50 | 0.90 | 0.60  | -0.17 | 0.09  | 0.10  | -0.19 |
|                             | 1   | 160      | CGR5663          | NAU2343  | 4.76 | 1.79 | 2.41  | -0.24 | 0.01  | -0.34 | 0.33  |
|                             | 9   | 59       | SWU15194         | HAU190   | 3.61 | 1.78 | 0.60  | 0.24  | -0.15 | 0.18  | -0.04 |
|                             | 11  | 153      | PGML2202         | CGR6580  | 3.60 | 0.37 | 1.95  | 0.11  | -0.02 | 0.31  | -0.29 |
|                             | 14  | 75       | SWU14545         | SWU14543 | 3.29 | 0.90 | 0.32  | 0.17  | -0.03 | -0.11 | 0.13  |
|                             | 16  | 26       | SWU10627         | PGML1309 | 3.09 | 0.72 | 0.53  | -0.15 | -0.03 | 0.17  | -0.14 |
|                             | 20  | 116      | SWU20035         | DPL0319  | 2.52 | 1.54 | 0.54  | -0.22 | 0.05  | -0.18 | 0.12  |
|                             | 21  | 52       | SWU16487         | SWU16488 | 3.10 | 0.85 | 1.09  | -0.16 | -0.20 | 0.25  | -0.05 |
|                             | 21  | 212      | HAU0423          | CGR5806  | 4.47 | 2.77 | 1.42  | -0.31 | 0.06  | -0.29 | 0.23  |
|                             | 24  | 32       | PGML4657         | Gh454    | 7.91 | 3.41 | 0.31  | 0.33  | -0.13 | 0.01  | 0.11  |
|                             | 26  | 149      | SWU0514          | SWU18488 | 3.04 | 2.13 | 0.57  | -0.26 | -0.01 | -0.16 | 0.17  |
|                             | 27  | 12       | SWU11038         | SWU11384 | 3.96 | 2.39 | 0.17  | -0.27 | 0.02  | -0.10 | 0.07  |
| <i>t</i> <sub>3</sub>       | 1   | 35       | NAU3177          | ICR03724 | 3.04 | 1.88 | 0.68  | -0.32 | 0.27  | -0.12 | -0.15 |
|                             | 1   | 48       | SWU10986         | NAU2218  | 2.75 | 1.93 | 0.52  | -0.32 | 0.16  | 0.07  | -0.23 |
|                             | 1   | 159      | CGR5663          | NAU2343  | 4.69 | 1.67 | 1.92  | -0.29 | 0.10  | -0.43 | 0.33  |
|                             | 4   | 1        | SWU18881         | NAU2701  | 2.75 | 1.66 | 0.31  | -0.29 | -0.05 | -0.13 | 0.17  |
|                             | 14  | 53       | CGR6784          | NAU874   | 4.30 | 3.41 | 0.11  | 0.42  | -0.07 | -0.04 | 0.10  |
|                             | 14  | 72       | Gh120            | PGML1884 | 3.90 | 2.56 | 0.46  | 0.36  | 0.10  | -0.22 | 0.12  |
|                             | 16  | 158      | SWU10056         | SWU10037 | 2.52 | 0.01 | 2.06  | -0.02 | -0.22 | -0.25 | 0.47  |
|                             | 21  | 254      | DPL0777          | CGR5217  | 3.74 | 0.01 | 2.74  | -0.03 | 0.52  | -0.15 | -0.36 |
| <i>t</i> <sub>4</sub>       | 1   | 159      | CGR5663          | NAU2343  | 3.25 | 0.77 | 1.67  | -0.21 | 0.06  | -0.41 | 0.34  |
|                             | 9   | 63       | HAU1618          | NAU2873  | 3.22 | 2.21 | 0.13  | 0.36  | 0.03  | 0.08  | -0.12 |
|                             | 11  | 72       | CGR5421          | ICR08245 | 4.35 | 3.16 | 0.51  | -0.43 | 0.24  | -0.06 | -0.17 |
|                             | 12  | 59       | Gh631            | HAU1321  | 3.00 | 2.26 | 0.17  | -0.36 | 0.00  | 0.12  | -0.12 |
|                             | 14  | 54       | NAU874           | SWU13824 | 2.96 | 2.05 | 0.14  | 0.34  | -0.01 | 0.11  | -0.10 |
|                             | 24  | 30       | PGML4657         | Gh454    | 3.59 | 1.86 | 1.50  | 0.33  | -0.08 | -0.31 | 0.40  |
|                             | 26  | 156      | SWU18488         | SWU18672 | 3.24 | 2.02 | 0.17  | -0.34 | -0.10 | -0.04 | 0.14  |

| Stage                        | Chi | Position | Flanking markers |          | LOD  | V(A) | V(AE) | A     | AE1   | AE2   | AE3   |
|------------------------------|-----|----------|------------------|----------|------|------|-------|-------|-------|-------|-------|
|                              | 27  | 58       | CGR6356          | SWU11632 | 3.60 | 2.57 | 0.18  | -0.39 | -0.08 | 0.14  | -0.07 |
| BCVF <sub>1</sub> population |     |          |                  |          |      |      |       |       |       |       |       |
| <i>t1</i>                    | 4   | 55       | SWU16783         | SWU18876 | 2.91 | 2.11 | 0.40  | 0.11  | 0.04  | 0.03  | -0.06 |
|                              | 12  | 128      | Gh631            | COT107   | 3.33 | 1.81 | 1.33  | -0.10 | 0.00  | -0.11 | 0.10  |
|                              | 21  | 58       | SHIN0337         | SWU16370 | 3.94 | 2.85 | 0.56  | 0.12  | 0.06  | 0.02  | -0.07 |
|                              | 23  | 62       | SHIN1076         | BNL3482  | 2.64 | 0.15 | 0.61  | -0.03 | -0.01 | 0.08  | -0.06 |
|                              | 23  | 148      | ICR06429         | SWU0506  | 2.59 | 1.76 | 0.59  | 0.11  | 0.08  | 0.01  | -0.08 |
|                              | 23  | 277      | NAU2238          | NAU3588  | 6.55 | 4.18 | 1.86  | -0.15 | 0.01  | -0.13 | 0.12  |
|                              | 24  | 3        | PGML1207         | Gh54     | 4.05 | 0.93 | 0.45  | 0.07  | 0.02  | -0.07 | 0.05  |
| <i>t2</i>                    | 2   | 9        | DPL0217          | CGR6695  | 3.06 | 1.61 | 0.11  | -0.24 | 0.08  | -0.08 | 0.00  |
|                              | 16  | 100      | SWU18366         | SWU18579 | 4.36 | 2.47 | 0.45  | -0.30 | -0.17 | 0.03  | 0.14  |
|                              | 19  | 47       | DC40130          | SWU17897 | 2.54 | 0.36 | 1.28  | 0.12  | 0.09  | 0.21  | -0.30 |
|                              | 21  | 58       | SHIN0337         | SWU16370 | 3.29 | 2.03 | 0.14  | 0.27  | -0.04 | 0.10  | -0.06 |
|                              | 23  | 58       | SHIN1076         | BNL3482  | 3.68 | 0.05 | 1.18  | -0.04 | 0.18  | 0.12  | -0.30 |
|                              | 23  | 279      | NAU3588          | NAU5373a | 3.92 | 1.62 | 1.08  | -0.24 | -0.26 | 0.04  | 0.22  |
|                              | 24  | 61       | Gh54             | Gh454    | 3.12 | 0.88 | 0.39  | 0.19  | -0.16 | 0.03  | 0.13  |
|                              | 25  | 62       | DPL0377          | SWU19413 | 8.10 | 4.00 | 5.06  | 0.38  | -0.29 | 0.61  | -0.32 |
|                              | 34  | 5        | JESPR297         | ICR00647 | 2.92 | 1.72 | 0.35  | -0.25 | 0.10  | -0.16 | 0.06  |
| <i>t3</i>                    | 2   | 114      | SWU11976         | SWU12001 | 2.74 | 1.27 | 1.23  | -0.25 | 0.17  | -0.34 | 0.18  |
|                              | 23  | 279      | NAU3588          | NAU5373a | 5.08 | 2.00 | 1.53  | -0.31 | -0.28 | -0.09 | 0.37  |
| <i>t4</i>                    | 2   | 115      | SWU11976         | SWU12001 | 2.60 | 0.80 | 1.32  | -0.21 | 0.09  | -0.36 | 0.27  |
|                              | 23  | 0        | CGR5158          | HAU1758  | 2.98 | 0.00 | 1.92  | 0.01  | 0.44  | -0.37 | -0.07 |
|                              | 23  | 278      | NAU2238          | NAU3588  | 4.37 | 0.62 | 2.29  | -0.18 | -0.34 | -0.14 | 0.48  |

See footnotes of additional table S5 for explanations

**Table S7** Main effects and environmental interactions detected for boll number per plant in two MPH data by inclusive composite interval mapping

| Stage            | Chi | Position | Flanking markers |          | LOD  | V(A) | V(AE) | A     | AE1   | AE2   | AE3   |
|------------------|-----|----------|------------------|----------|------|------|-------|-------|-------|-------|-------|
| MPH (XZ hybrid)  |     |          |                  |          |      |      |       |       |       |       |       |
| <i>t1</i>        | 2   | 57       | SWU11887         | SWU11976 | 3.95 | 3.44 | 0.51  | -0.11 | -0.12 | 0.05  | 0.07  |
|                  | 8   | 31       | Gh197            | DC20094  | 3.26 | 2.97 | 0.29  | 0.10  | 0.10  | -0.03 | -0.07 |
|                  | 11  | 28       | NAU5428          | Gh256    | 2.79 | 2.15 | 0.65  | -0.08 | -0.02 | 0.04  | -0.03 |
|                  | 16  | 30       | SWU20341         | DPL0897  | 3.52 | 0.04 | 3.48  | 0.01  | -0.10 | 0.15  | -0.05 |
|                  | 24  | 2        | Gh298            | SWU13133 | 3.73 | 0.98 | 2.75  | 0.06  | -0.09 | 0.00  | 0.09  |
| <i>t2</i>        | 2   | 92       | PGML0700         | SWU12016 | 3.04 | 2.63 | 0.41  | -0.23 | -0.21 | -0.01 | 0.21  |
|                  | 11  | 148      | CAU0003          | DC40250  | 3.43 | 1.95 | 1.48  | 0.20  | 0.16  | 0.13  | -0.29 |
|                  | 15  | 16       | DPL0182          | SWU11691 | 2.62 | 0.00 | 2.62  | -0.01 | 0.02  | -0.23 | 0.21  |
|                  | 26  | 202      | SWU18697         | PGML1289 | 3.22 | 0.15 | 3.07  | -0.06 | 0.31  | -0.13 | -0.18 |
|                  | 28  | 85       | SWU12343         | SWU14060 | 2.87 | 1.33 | 1.54  | 0.16  | -0.12 | 0.27  | -0.15 |
| <i>t3</i>        | 1   | 165      | SWU0077          | HAU1417  | 3.13 | 0.06 | 3.06  | -0.05 | -0.07 | -0.34 | 0.41  |
|                  | 19  | 35       | NAU3437          | NAU2894  | 2.73 | 0.12 | 2.62  | -0.06 | 0.41  | -0.15 | -0.26 |
|                  | 26  | 26       | SWU17395         | DC30107  | 2.57 | 0.74 | 1.83  | -0.16 | 0.00  | 0.26  | -0.25 |
| <i>t4</i>        | 9   | 63       | HAU1618          | NAU2873  | 3.47 | 1.66 | 1.81  | 0.27  | 0.28  | 0.04  | -0.31 |
|                  | 11  | 73       | CGR5421          | ICR08245 | 3.51 | 3.10 | 0.41  | -0.36 | 0.23  | -0.08 | -0.15 |
|                  | 21  | 52       | SWU16487         | SWU16488 | 2.73 | 1.63 | 1.10  | -0.27 | -0.14 | -0.10 | 0.25  |
|                  | 27  | 57       | CGR6356          | SWU11632 | 2.52 | 2.08 | 0.43  | -0.30 | -0.09 | 0.18  | -0.09 |
| MPH (XZV hybrid) |     |          |                  |          |      |      |       |       |       |       |       |
| <i>t1</i>        | 2   | 9        | DPL0217          | CGR6695  | 2.97 | 2.07 | 0.15  | -0.11 | -0.03 | 0.00  | 0.04  |
|                  | 12  | 110      | CGR6847          | SWU17197 | 2.70 | 1.57 | 0.80  | -0.09 | -0.05 | -0.05 | 0.09  |
|                  | 16  | 15       | NAU747           | HAU1129  | 2.99 | 0.70 | 0.18  | 0.06  | -0.03 | -0.01 | 0.04  |
|                  | 19  | 0        | NAU2816          | PGML4342 | 2.54 | 0.40 | 1.54  | 0.05  | 0.00  | 0.11  | -0.11 |
|                  | 23  | 50       | HAU1758          | SHIN1076 | 2.89 | 0.01 | 1.04  | 0.01  | 0.05  | 0.06  | -0.11 |
|                  | 24  | 2        | PGML1207         | Gh54     | 2.56 | 0.82 | 0.09  | 0.07  | 0.00  | -0.03 | 0.03  |
|                  | 39  | 96       | SWU16437         | SWU16432 | 2.69 | 1.80 | 0.15  | 0.10  | 0.02  | 0.02  | -0.04 |
| <i>t2</i>        | 1   | 193      | DPL0790          | ICR03725 | 3.01 | 0.02 | 2.47  | -0.03 | -0.38 | 0.36  | 0.02  |
|                  | 2   | 9        | DPL0217          | CGR6695  | 7.40 | 4.48 | 0.28  | -0.40 | 0.13  | -0.11 | -0.03 |
|                  | 23  | 57       | SHIN1076         | BNL3482  | 3.64 | 0.03 | 1.79  | 0.03  | 0.21  | 0.15  | -0.36 |
|                  | 25  | 46       | NAU2968          | DPL0377  | 2.62 | 0.29 | 2.46  | 0.10  | -0.18 | 0.42  | -0.23 |
|                  | 26  | 53       | DC30107          | DPL0070  | 2.55 | 1.91 | 0.14  | -0.26 | -0.05 | -0.05 | 0.10  |
|                  | 37  | 36       | JESPR154         | BNL5602  | 2.68 | 2.02 | 0.82  | -0.27 | 0.04  | -0.23 | 0.18  |
| <i>t3</i>        | 2   | 6        | DPL0217          | CGR6695  | 4.71 | 3.44 | 1.35  | -0.51 | 0.34  | 0.09  | -0.43 |
|                  | 23  | 75       | BNL3482          | HAU0244  | 3.26 | 0.93 | 0.50  | 0.28  | 0.28  | -0.20 | -0.08 |
|                  | 26  | 53       | DC30107          | DPL0070  | 4.56 | 3.34 | 0.21  | -0.50 | 0.17  | -0.06 | -0.11 |
|                  | 31  | 67       | HAU0355          | SWU16777 | 3.10 | 2.15 | 0.90  | -0.40 | 0.17  | 0.20  | -0.37 |

| Stage     | Chi | Position | Flanking markers  | LOD  | V(A) | V(AE) | A     | AE1   | AE2   | AE3   |
|-----------|-----|----------|-------------------|------|------|-------|-------|-------|-------|-------|
| <i>t4</i> | 2   | 16       | SWU11013 DPL0041  | 2.80 | 2.07 | 0.94  | -0.42 | 0.33  | 0.04  | -0.36 |
|           | 3   | 14       | SWU12840 NAU2742  | 3.18 | 2.03 | 0.07  | -0.42 | 0.10  | -0.09 | 0.00  |
|           | 21  | 231      | BNL3171 HAU2937   | 4.05 | 3.06 | 0.70  | 0.51  | -0.34 | 0.09  | 0.25  |
|           | 26  | 53       | DC30107 DPL0070   | 4.14 | 3.22 | 0.38  | -0.52 | 0.20  | 0.04  | -0.24 |
|           | 31  | 67       | HAU0355 SWU16777  | 3.11 | 2.45 | 1.22  | -0.46 | 0.26  | 0.19  | -0.45 |
|           | 31  | 117      | SWU16730 SWU16721 | 3.24 | 2.24 | 0.18  | 0.44  | -0.17 | 0.05  | 0.12  |

See footnotes of additional table S5 for explanations



**Table S8** Epistatic effects and environmental interactions detected for boll number per plant in RIL and RILV

populations using two-locus analysis by inclusive composite interval mapping

| Stage          | Chi | Flanking markers |                 | Chj | Flanking markers |                 | LOD  | V(AA) | V(AAE) | AA    | AAE1  | AAE2  | AAE3  |
|----------------|-----|------------------|-----------------|-----|------------------|-----------------|------|-------|--------|-------|-------|-------|-------|
| RIL population |     |                  |                 |     |                  |                 |      |       |        |       |       |       |       |
| <i>t1</i>      | 1   | ICR03724         | ICR03725        | 2   | SWU11887         | SWU11976        | 11.0 | 4.63  | 0.90   | -0.20 | -0.05 | -0.08 | 0.13  |
|                | 3   | SWU12732         | SWU12783        | 5   | PGML1917         | SWU17715        | 5.52 | 2.48  | 0.53   | -0.15 | -0.02 | -0.08 | 0.09  |
|                | 4   | SWU16783         | NAU3868         | 9   | HAU190           | HAU1618         | 5.71 | 1.86  | 1.10   | -0.13 | -0.04 | -0.10 | 0.14  |
|                | 6   | ICR10602         | SWU19656        | 9   | SWU15511         | SWU15413        | 5.97 | 2.69  | 0.51   | 0.16  | 0.05  | 0.05  | -0.10 |
|                | 5   | PGML1917         | SWU17715        | 9   | CGR6876          | CGR5758         | 5.73 | 1.91  | 0.98   | 0.13  | 0.04  | 0.09  | -0.13 |
|                | 3   | SWU12819         | SWU12765        | 9   | NAU3966          | SWU15157        | 5.57 | 0.91  | 1.55   | -0.09 | -0.06 | -0.10 | 0.17  |
|                | 6   | ICR03206         | NAU896          | 14  | <b>BNL3661</b>   | <b>PGML2498</b> | 5.09 | 1.20  | 1.15   | -0.10 | -0.06 | -0.09 | 0.14  |
|                | 1   | NAU3384          | CGR5663         | 14  | <b>BNL3661</b>   | <b>PGML2498</b> | 5.93 | 2.77  | 0.51   | 0.16  | 0.08  | 0.01  | -0.09 |
|                | 7   | CGR5372          | SWU10205        | 14  | NAU874           | SWU13824        | 5.87 | 2.36  | 0.82   | -0.15 | -0.07 | -0.06 | 0.12  |
|                | 11  | CGR6580          | SWU15972        | 14  | PGML1368         | PGML1568        | 5.08 | 2.11  | 0.43   | -0.15 | -0.02 | -0.07 | 0.08  |
|                | 3   | SWU12732         | SWU12783        | 16  | PGML1709         | SWU10627        | 5.27 | 2.14  | 0.84   | -0.14 | -0.01 | -0.10 | 0.11  |
|                | 10  | CGR5873          | ICR00093        | 16  | Gh56             | NAU5120         | 5.31 | 2.26  | 0.55   | 0.14  | 0.06  | 0.04  | -0.10 |
|                | 16  | SWU10056         | SWU10037        | 17  | SWU12818         | CGR5576         | 5.11 | 1.66  | 0.44   | 0.13  | 0.05  | 0.05  | -0.09 |
|                | 12  | DPL0303          | COT107          | 17  | CGR5576          | NAU3765         | 6.25 | 3.08  | 0.49   | -0.17 | -0.01 | -0.07 | 0.09  |
|                | 2   | SWU12126         | SWU12147        | 18  | DC40150          | ICR02849        | 5.29 | 2.49  | 0.47   | -0.15 | -0.04 | -0.05 | 0.09  |
|                | 9   | SWU15194         | HAU190          | 19  | NAU5330          | Gh72            | 6.35 | 2.35  | 0.87   | -0.15 | -0.10 | -0.02 | 0.12  |
|                | 2   | SWU11887         | SWU11976        | 19  | SWU17897         | CGR5539         | 5.09 | 1.99  | 0.60   | 0.13  | 0.03  | 0.07  | -0.10 |
|                | 16  | SWU10062         | SWU10094        | 20  | SWU20246         | SWU20501a       | 7.48 | 3.71  | 0.28   | 0.18  | 0.04  | 0.03  | -0.07 |
|                | 7   | NAU1357          | SWU10067        | 20  | SWU20035         | DPL0319         | 5.30 | 2.83  | 0.08   | 0.16  | 0.04  | 0.00  | -0.03 |
|                | 15  | CGR6889          | DPL0182         | 21  | SWU16649         | BNL1552         | 5.44 | 1.73  | 0.75   | 0.12  | 0.09  | 0.02  | -0.11 |
|                | 2   | SWU12393         | SWU11013        | 21  | SWU16138         | BNL1053         | 5.38 | 1.49  | 1.24   | -0.12 | -0.08 | -0.07 | 0.15  |
|                | 21  | SWU0830          | HAU2004         | 21  | SWU14431a        | SWU15915        | 5.20 | 1.99  | 0.51   | 0.15  | 0.07  | 0.04  | -0.11 |
|                | 5   | DPL0022          | SWU17787        | 21  | SWU0189          | DPL0050a        | 5.14 | 1.76  | 0.75   | -0.13 | -0.06 | -0.06 | 0.12  |
|                | 16  | SWU10214         | Gh56            | 21  | CGR5808          | HAU0423         | 7.13 | 2.98  | 0.76   | 0.16  | 0.04  | 0.08  | -0.12 |
|                | 11  | CGR5421          | ICR08245        | 21  | CGR5806          | DPL0777         | 5.09 | 2.47  | 0.31   | 0.15  | 0.03  | 0.04  | -0.08 |
|                | 14  | SWU14224         | DPL0565         | 22  | CAU0161          | NAU2026         | 5.25 | 1.36  | 1.33   | 0.12  | 0.05  | 0.11  | -0.16 |
|                | 13  | NAU2893          | Gh157           | 23  | PGML4186         | NAU3100         | 5.30 | 2.36  | 0.61   | -0.15 | -0.07 | -0.03 | 0.11  |
|                | 14  | ICR12037         | CGR5675         | 23  | PGML4186         | NAU3100         | 5.60 | 1.44  | 1.31   | 0.12  | 0.04  | 0.11  | -0.15 |
|                | 2   | SWU12393         | SWU11013        | 24  | BNL1521          | HAU2504         | 7.26 | 2.26  | 1.07   | -0.14 | -0.09 | -0.05 | 0.14  |
|                | 11  | CAU0003          | DC40250         | 25  | CGR6864          | SWU19815        | 6.43 | 2.69  | 0.67   | 0.16  | 0.08  | 0.02  | -0.11 |
|                | 14  | NAU874           | SWU13824        | 25  | DPL0282          | SWU19763        | 6.97 | 2.65  | 0.74   | 0.16  | 0.09  | 0.02  | -0.11 |
|                | 13  | SHIN1462         | SWU22374        | 25  | DPL0282          | SWU19763        | 5.93 | 1.96  | 0.79   | 0.13  | -0.03 | 0.11  | -0.09 |
|                | 4   | SWU12672         | HAU1332         | 26  | SWU17467         | SWU17419        | 5.68 | 2.79  | 0.31   | 0.16  | 0.03  | 0.05  | -0.08 |
|                | 2   | SWU11887         | SWU11976        | 26  | SWU17432         | SWU17395        | 7.19 | 3.29  | 0.57   | -0.17 | -0.06 | -0.04 | 0.10  |
|                | 1   | BNL2827a         | NAU6367         | 26  | SWU18681         | SWU0598         | 5.18 | 2.24  | 0.50   | -0.14 | -0.04 | -0.06 | 0.10  |
|                | 20  | SWU20649         | SWU20636        | 27  | SWU10994         | HAU1001         | 5.13 | 1.89  | 0.74   | 0.13  | 0.03  | 0.08  | -0.11 |
|                | 19  | NAU3437          | NAU2894         | 27  | SWU11384         | ICR11885        | 5.84 | 3.15  | 0.22   | 0.17  | 0.05  | 0.02  | -0.06 |
|                | 20  | CER0167          | SWU20064        | 28  | CGR5534          | SHIN0219        | 8.67 | 2.88  | 1.29   | 0.16  | 0.08  | 0.08  | -0.15 |
|                | 21  | CGR5806          | DPL0777         | 28  | NBRI0014         | SWU12107        | 5.17 | 1.97  | 0.74   | 0.13  | 0.08  | 0.03  | -0.11 |
|                | 7   | SWU10205         | HAU1483a        | 29  | DC20127          | DPL0252         | 5.39 | 2.53  | 0.44   | -0.15 | -0.03 | -0.05 | 0.09  |
|                | 6   | <b>CGR5108</b>   | <b>ICR03206</b> | 29  | BNL3261          | CGR5111         | 5.68 | 2.23  | 0.61   | 0.14  | 0.03  | 0.08  | -0.10 |
|                | 9   | NAU1282          | CGR6771         | 30  | BNL243           | CER0168         | 5.06 | 1.89  | 0.80   | 0.13  | 0.10  | 0.00  | -0.10 |
| <i>t2</i>      | 1   | <b>SWU10986</b>  | <b>NAU2218</b>  | 1   | CGR5663          | NAU2343         | 5.01 | 2.45  | 0.36   | -0.35 | -0.13 | -0.06 | 0.18  |
|                | 1   | <b>SWU10986</b>  | <b>NAU2218</b>  | 2   | SWU11887         | SWU11976        | 6.31 | 3.12  | 0.21   | -0.40 | -0.08 | -0.07 | 0.15  |

| Stage | Chi             | Flanking markers |    | Chj             | Flanking markers |      | LOD  | V(AA) | V(AAE) | AA    | AAE1  | AAE2  | AAE3 |
|-------|-----------------|------------------|----|-----------------|------------------|------|------|-------|--------|-------|-------|-------|------|
| 1     | HAU1417         | NAU2437          | 5  | PGML1917        | SWU17715         | 5.06 | 1.15 | 1.14  | 0.25   | 0.24  | 0.10  | -0.34 |      |
| 1     | HAU1417         | NAU2437          | 6  | ICR00143        | CGR5108          | 5.17 | 1.99 | 0.86  | -0.33  | -0.21 | -0.08 | 0.29  |      |
| 6     | ICR03206        | NAU896           | 6  | NAU896          | BNL3650          | 6.36 | 2.75 | 0.78  | 0.50   | 0.33  | 0.01  | -0.34 |      |
| 6     | ICR03206        | NAU896           | 7  | Gh474           | SWU10785         | 6.09 | 2.22 | 0.84  | -0.35  | -0.19 | -0.11 | 0.30  |      |
| 3     | SWU12819        | SWU12765         | 8  | CGR6508         | Gh197            | 5.33 | 2.02 | 0.86  | 0.33   | -0.05 | 0.28  | -0.23 |      |
| 2     | SWU12393        | SWU11013         | 8  | HAU1470a        | SHIN1341         | 5.39 | 2.33 | 0.83  | 0.35   | 0.08  | 0.21  | -0.29 |      |
| 5     | PGML1917        | SWU17715         | 9  | NAU1282         | CGR6771          | 5.16 | 1.52 | 1.51  | -0.28  | -0.39 | 0.10  | 0.29  |      |
| 3     | SWU12840        | NAU2742          | 11 | PGML2202        | CGR6580          | 6.10 | 2.18 | 1.11  | 0.34   | 0.27  | 0.05  | -0.32 |      |
| 3     | HAU2424         | CER0028          | 13 | SHIN1462        | SWU22374         | 6.24 | 2.20 | 1.25  | 0.34   | 0.27  | 0.08  | -0.35 |      |
| 13    | SWU22374        | HAU2857          | 13 | DPL0894         | SWU10800         | 5.63 | 2.57 | 0.83  | 0.40   | 0.29  | -0.04 | -0.25 |      |
| 7     | NAU1357         | SWU10067         | 14 | SWU13909        | TMB0071          | 9.25 | 4.48 | 0.92  | 0.49   | 0.28  | -0.02 | -0.26 |      |
| 1     | NAU6367         | MUSS422          | 14 | SWU14224        | DPL0565          | 5.84 | 2.21 | 0.89  | 0.34   | 0.17  | 0.13  | -0.31 |      |
| 14    | SWU13909        | TMB0071          | 14 | ICR12130        | DPL0502          | 5.64 | 2.84 | 0.44  | 0.38   | 0.05  | 0.15  | -0.20 |      |
| 7     | CGR5001         | CGR6586          | 15 | DC40183         | DC40175          | 8.04 | 4.30 | 0.51  | 0.47   | 0.15  | 0.07  | -0.23 |      |
| 1     | NAU3384         | CGR5663          | 16 | SWU10266        | DC40065          | 9.14 | 4.05 | 1.14  | -0.47  | -0.09 | -0.25 | 0.33  |      |
| 14    | NAU3820         | NAU2960          | 16 | NAU862          | CGR6802          | 5.49 | 2.94 | 0.39  | 0.39   | 0.16  | 0.02  | -0.19 |      |
| 9     | Gh158           | DC40407          | 16 | CGR6802         | HAU1129          | 7.11 | 3.70 | 0.52  | 0.44   | 0.20  | 0.01  | -0.21 |      |
| 12    | DPL0303         | COT107           | 16 | SWU10062        | SWU10094         | 7.95 | 3.58 | 0.97  | 0.44   | 0.23  | 0.08  | -0.31 |      |
| 11    | CGR6580         | SWU15972         | 16 | SWU10038        | ICR00016         | 7.53 | 3.31 | 0.85  | 0.42   | 0.24  | 0.04  | -0.28 |      |
| 11    | NAU3390         | NAU2460          | 17 | NAU3765         | SWU14627         | 6.33 | 2.80 | 0.97  | -0.39  | -0.24 | -0.08 | 0.32  |      |
| 5     | PGML4350        | SWU17781         | 18 | DC40150         | ICR02849         | 5.59 | 2.33 | 1.23  | 0.37   | 0.36  | -0.08 | -0.28 |      |
| 1     | SWU11191        | BNL2827b         | 19 | NAU5330         | Gh72             | 5.31 | 2.34 | 0.77  | 0.35   | 0.08  | 0.19  | -0.28 |      |
| 10    | SWU20501b       | CGR5873          | 19 | NAU3437         | NAU2894          | 5.30 | 2.37 | 0.52  | 0.36   | 0.13  | 0.12  | -0.25 |      |
| 6     | ICR03206        | NAU896           | 19 | SWU14431b       | SWU17782         | 6.49 | 2.18 | 1.05  | 0.34   | 0.10  | 0.22  | -0.32 |      |
| 10    | SWU20501b       | CGR5873          | 20 | SWU20700        | CGR5548          | 6.52 | 3.62 | 0.47  | -0.45  | -0.18 | -0.04 | 0.22  |      |
| 19    | PGML4342        | SWU14431         | 20 | SWU20636        | CGR6154          | 6.12 | 2.75 | 0.70  | -0.38  | -0.18 | -0.08 | 0.26  |      |
| 16    | SWU10062        | SWU10094         | 20 | SWU20246        | SWU20501a        | 6.85 | 3.79 | 0.24  | 0.45   | 0.00  | 0.13  | -0.14 |      |
| 2     | PGML0700        | SWU12016         | 21 | Gh451           | SWU16489         | 8.19 | 3.74 | 0.64  | -0.44  | -0.14 | -0.11 | 0.26  |      |
| 3     | Gh663           | CGR6528          | 21 | SWU16488        | SWU16138         | 5.26 | 2.18 | 0.70  | -0.34  | -0.20 | -0.07 | 0.26  |      |
| 21    | SWU0830         | HAU2004          | 21 | <b>SWU14431</b> | <b>SWU15915</b>  | 5.97 | 1.89 | 0.60  | 0.39   | 0.28  | -0.01 | -0.27 |      |
| 10    | CGR5873         | ICR00093         | 21 | BNL3171         | CGR5808          | 5.05 | 1.55 | 1.39  | -0.29  | -0.37 | 0.09  | 0.27  |      |
| 16    | Gh56            | NAU5120          | 21 | BNL3171         | CGR5808          | 5.47 | 2.04 | 1.17  | 0.33   | 0.31  | -0.02 | -0.28 |      |
| 17    | CGR5576         | NAU3765          | 21 | <b>CGR5808</b>  | <b>HAU0423</b>   | 5.63 | 2.33 | 1.27  | 0.35   | 0.31  | 0.01  | -0.31 |      |
| 1     | <b>SWU10986</b> | <b>NAU2218</b>   | 21 | HAU0423         | CGR5806          | 5.81 | 3.31 | 0.35  | -0.43  | -0.03 | -0.15 | 0.18  |      |
| 13    | SWU22309        | SWU22324         | 21 | HAU0423         | CGR5806          | 5.78 | 2.28 | 0.90  | 0.36   | 0.18  | 0.14  | -0.32 |      |
| 20    | SWU20246        | SWU20501         | 22 | SWU21646        | SWU21585         | 5.21 | 2.24 | 0.64  | 0.34   | 0.19  | 0.06  | -0.24 |      |
| 1     | SWU10912        | DPL0090          | 22 | SWU21586        | PGML1712         | 5.01 | 1.81 | 0.91  | 0.32   | 0.25  | 0.04  | -0.29 |      |
| 8     | CGR6508         | Gh197            | 23 | SWU14807        | PGML4185         | 5.07 | 2.78 | 0.52  | 0.38   | 0.21  | -0.02 | -0.19 |      |
| 11    | CER0098         | CGR5421          | 24 | CGR5202         | Gh298            | 5.26 | 2.13 | 0.77  | 0.34   | 0.10  | 0.19  | -0.29 |      |
| 9     | PGML2830        | CGR6876          | 24 | Gh298           | SWU13133         | 5.07 | 1.73 | 1.01  | 0.30   | 0.18  | 0.14  | -0.33 |      |
| 11    | NAU3390         | NAU2460          | 25 | HAU1382         | SWU19848         | 7.59 | 3.88 | 0.76  | -0.45  | -0.20 | -0.07 | 0.27  |      |
| 16    | SWU10056        | SWU10037         | 25 | HAU1382         | SWU19848         | 5.50 | 1.76 | 1.03  | -0.31  | -0.06 | -0.25 | 0.31  |      |
| 10    | BNL2960         | SWU20511         | 25 | DPL0282         | SWU19763         | 5.55 | 2.26 | 0.61  | -0.34  | -0.19 | -0.05 | 0.24  |      |
| 9     | Gh27            | SWU15194         | 25 | SWU19430        | PGML1219         | 5.11 | 1.80 | 0.69  | -0.30  | 0.02  | -0.24 | 0.22  |      |
| 13    | DPL0572         | HAU2558          | 25 | SWU19430        | PGML1219         | 5.37 | 2.17 | 0.83  | -0.34  | -0.22 | -0.06 | 0.27  |      |
| 24    | BNL1521         | HAU2504          | 25 | SWU19430        | PGML1219         | 5.04 | 1.73 | 0.80  | 0.30   | 0.02  | 0.24  | -0.26 |      |
| 25    | SWU19848        | CGR6864          | 26 | BNL598          | PGML1637         | 5.45 | 1.72 | 1.12  | 0.30   | 0.16  | 0.17  | -0.33 |      |
| 20    | SWU20246        | SWU20501         | 26 | BNL598          | PGML1637         | 5.22 | 1.99 | 0.82  | -0.32  | -0.14 | -0.15 | 0.30  |      |
| 7     | SWU10064        | NAU3181          | 26 | SWU17467        | SWU17419         | 5.33 | 2.93 | 0.26  | 0.39   | 0.05  | 0.11  | -0.16 |      |

| Stage | Chi | Flanking markers |                 | Chj | Flanking markers |                 | LOD  | V(AA) | V(AAE) | AA    | AAE1  | AAE2  | AAE3  |
|-------|-----|------------------|-----------------|-----|------------------|-----------------|------|-------|--------|-------|-------|-------|-------|
|       | 13  | SWU22413         | CGR5331         | 26  | SWU17251         | C2_0135         | 5.12 | 3.01  | 0.20   | -0.40 | -0.06 | -0.09 | 0.14  |
|       | 14  | CIR228           | BNL2485         | 26  | C2_0135          | PGML2321        | 5.44 | 2.40  | 0.58   | 0.35  | 0.14  | 0.10  | -0.24 |
|       | 2   | PGML0700         | SWU12016        | 26  | C2_0135          | PGML2321        | 7.50 | 2.93  | 0.71   | -0.39 | -0.17 | -0.10 | 0.27  |
|       | 21  | SWU15915         | SWU0189         | 27  | <b>SWU10994</b>  | <b>HAU1001</b>  | 5.69 | 2.52  | 0.72   | -0.36 | -0.14 | -0.13 | 0.27  |
|       | 5   | HAU1603          | PGML4457        | 27  | CGR6857          | ICR11205        | 8.91 | 4.39  | 0.64   | 0.49  | 0.04  | 0.21  | -0.24 |
|       | 13  | DPL0894          | SWU10800        | 28  | HAU3071          | CGR5534         | 5.16 | 1.62  | 0.98   | -0.29 | -0.20 | -0.11 | 0.31  |
|       | 21  | SWU0189          | DPL0050a        | 29  | DC20127          | DPL0252         | 6.75 | 2.61  | 1.35   | -0.37 | -0.33 | 0.04  | 0.28  |
|       | 17  | ICR03391         | SWU12838        | 29  | C2_0115          | ICR03107        | 5.21 | 2.22  | 0.92   | 0.34  | 0.27  | 0.00  | -0.27 |
|       | 13  | SWU22374         | HAU2857         | 29  | C2_0115          | ICR03107        | 5.44 | 3.06  | 0.48   | 0.41  | 0.22  | -0.05 | -0.17 |
|       | 16  | Gh56             | NAU5120         | 30  | BNL243           | CER0168         | 5.82 | 2.34  | 0.84   | 0.35  | 0.21  | 0.07  | -0.28 |
|       | 28  | SHIN0219         | TMB2386         | 30  | CER0168          | SWU21718        | 5.80 | 3.20  | 0.61   | 0.41  | 0.24  | -0.05 | -0.19 |
|       | 24  | SWU13758         | CGR5423         | 32  | NAU2140          | NAU2957         | 6.73 | 2.64  | 1.04   | -0.37 | 0.08  | -0.32 | 0.24  |
| t3    | 1   | <b>SWU10986</b>  | <b>NAU2218</b>  | 1   | CGR5663          | NAU2343         | 5.78 | 4.12  | 0.00   | -0.61 | -0.01 | 0.04  | -0.04 |
|       | 1   | <b>SWU10986</b>  | <b>NAU2218</b>  | 2   | SWU11950         | TMB1268         | 6.19 | 4.28  | 0.11   | -0.63 | 0.09  | -0.14 | 0.04  |
|       | 4   | SWU12672         | HAU1332         | 4   | SWU21617         | SWU11855        | 5.57 | 3.61  | 0.30   | -0.57 | -0.10 | -0.13 | 0.23  |
|       | 6   | ICR03206         | NAU896          | 6   | ICR03206         | NAU896          | 6.06 | 3.40  | 0.29   | 0.69  | 0.22  | 0.10  | -0.32 |
|       | 6   | ICR03206         | NAU896          | 7   | NAU3181          | SHIN0376        | 5.41 | 3.51  | 0.15   | 0.57  | 0.04  | -0.16 | 0.12  |
|       | 4   | SWU12672         | HAU1332         | 9   | HAU190           | HAU1618         | 5.07 | 3.17  | 0.32   | 0.53  | 0.21  | 0.03  | -0.24 |
|       | 7   | SWU10067         | SWU10064        | 14  | SWU13909         | TMB0071         | 6.56 | 4.67  | 0.19   | 0.66  | 0.19  | -0.08 | -0.11 |
|       | 7   | CGR5001          | CGR6586         | 15  | DC40183          | DC40175         | 5.52 | 4.03  | 0.01   | 0.61  | 0.04  | 0.00  | -0.04 |
|       | 9   | Gh158            | DC40407         | 16  | CGR6802          | HAU1129         | 6.35 | 4.32  | 0.21   | 0.63  | 0.17  | -0.16 | -0.01 |
|       | 12  | DPL0303          | COT107          | 16  | SWU10062         | SWU10094        | 5.54 | 3.63  | 0.26   | 0.58  | 0.13  | 0.09  | -0.22 |
|       | 13  | PGML0014         | CGR6732         | 17  | SWU12818         | CGR5576         | 5.53 | 3.72  | 0.29   | -0.60 | -0.21 | 0.23  | -0.02 |
|       | 11  | NAU3390          | NAU2460         | 17  | NAU3765          | SWU14627        | 6.32 | 4.37  | 0.26   | -0.65 | -0.16 | -0.03 | 0.19  |
|       | 7   | <b>Gh474</b>     | <b>SWU10785</b> | 20  | SWU20675         | SWU20649        | 6.01 | 3.96  | 0.26   | 0.61  | 0.04  | 0.17  | -0.21 |
|       | 19  | PGML4342         | SWU14431        | 20  | SWU20636         | CGR6154         | 5.43 | 3.79  | 0.10   | -0.59 | -0.10 | -0.02 | 0.13  |
|       | 2   | PGML0700         | SWU12016        | 21  | Gh451            | SWU16489        | 8.92 | 6.08  | 0.11   | -0.75 | -0.15 | 0.04  | 0.11  |
|       | 16  | Gh56             | NAU5120         | 21  | BNL3171          | CGR5808         | 8.99 | 5.95  | 0.40   | 0.74  | 0.27  | -0.05 | -0.23 |
|       | 12  | <b>HAU1316</b>   | <b>NAU3519</b>  | 22  | <b>SWU21635</b>  | <b>SWU21646</b> | 5.47 | 3.61  | 0.12   | -0.58 | -0.12 | 0.10  | 0.02  |
|       | 19  | DC40122          | NAU833a         | 22  | PGML1712         | SWU21538        | 5.79 | 3.40  | 0.76   | 0.58  | 0.21  | 0.18  | -0.38 |
|       | 13  | SWU22413         | CGR5331         | 23  | PGML4186         | NAU3100         | 5.11 | 3.78  | 0.08   | -0.59 | 0.12  | -0.06 | -0.06 |
|       | 11  | NAU3390          | NAU2460         | 25  | HAU1382          | SWU19848        | 6.89 | 4.91  | 0.00   | -0.68 | 0.01  | 0.02  | -0.03 |
|       | 16  | SWU10214         | Gh56            | 25  | SWU19815         | BNL3594         | 6.48 | 3.81  | 0.70   | -0.59 | -0.23 | -0.13 | 0.36  |
|       | 22  | PGML0695         | SWU20813        | 26  | MGHES31          | HAU1571         | 5.42 | 3.29  | 0.26   | -0.59 | -0.22 | 0.17  | 0.05  |
|       | 13  | SWU22374         | HAU2857         | 29  | C2_0115          | ICR03107        | 5.30 | 3.58  | 0.19   | 0.59  | 0.12  | -0.19 | 0.07  |
|       | 28  | TMB2386          | SWU12343        | 30  | BNL243           | CER0168         | 5.28 | 3.36  | 0.20   | 0.56  | 0.16  | -0.02 | -0.14 |
|       | 26  | SWU0598          | SWU18698        | 30  | CER0168          | SWU21718        | 5.15 | 3.25  | 0.29   | 0.56  | 0.25  | -0.12 | -0.12 |
| t4    | 1   | ICR03724         | ICR03725        | 2   | PGML0700         | SWU12016        | 5.16 | 3.27  | 0.01   | -0.56 | 0.02  | 0.04  | -0.06 |
|       | 1   | NAU3384          | CGR5663         | 8   | DC20094          | HAU1470b        | 5.02 | 2.59  | 0.52   | -0.50 | -0.26 | 0.29  | -0.03 |
|       | 1   | HAU1417          | NAU2437         | 9   | Gh27             | SWU15194        | 5.43 | 3.08  | 0.36   | 0.54  | 0.14  | -0.26 | 0.13  |
|       | 7   | SWU10067         | SWU10064        | 14  | SWU13909         | TMB0071         | 5.40 | 3.86  | 0.19   | 0.61  | 0.06  | -0.19 | 0.13  |
|       | 7   | SWU10064         | NAU3181         | 16  | SWU10038         | ICR00016        | 5.72 | 2.92  | 0.57   | -0.61 | 0.10  | 0.26  | -0.36 |
|       | 1   | SWU0077          | HAU1417         | 19  | NAU5330          | Gh72            | 5.34 | 2.70  | 0.88   | 0.52  | 0.00  | -0.36 | 0.36  |
|       | 10  | SWU20501b        | CGR5873         | 20  | SWU20700         | CGR5548         | 5.42 | 2.43  | 1.28   | -0.49 | -0.12 | 0.49  | -0.37 |
|       | 2   | PGML0700         | SWU12016        | 21  | Gh451            | SWU16489        | 7.99 | 4.99  | 0.10   | -0.70 | 0.09  | 0.04  | -0.13 |
|       | 1   | NAU3384          | CGR5663         | 21  | SWU14431a        | SWU15915        | 5.02 | 3.23  | 0.34   | -0.57 | 0.19  | 0.06  | -0.25 |
|       | 16  | Gh56             | NAU5120         | 21  | BNL3171          | CGR5808         | 5.39 | 2.94  | 0.55   | 0.55  | 0.34  | -0.22 | -0.12 |
|       | 11  | NAU3390          | NAU2460         | 25  | HAU1382          | SWU19848        | 5.83 | 3.99  | 0.26   | -0.62 | 0.13  | 0.09  | -0.22 |
|       | 10  | ICR00093         | ICR07050        | 26  | MGHES31          | HAU1571         | 5.59 | 2.78  | 1.03   | -0.52 | 0.05  | 0.36  | -0.41 |

| Stage           | Chi | Flanking markers |          | Chj | Flanking markers |          | LOD  | V(AA) | V(AAE) | AA    | AAE1  | AAE2  | AAE3  |
|-----------------|-----|------------------|----------|-----|------------------|----------|------|-------|--------|-------|-------|-------|-------|
|                 | 22  | SWU21533         | DPL0562  | 30  | BNL243           | CER0168  | 7.74 | 1.70  | 3.09   | -0.42 | -0.12 | 0.74  | -0.62 |
|                 | 28  | SWU12343         | SWU14060 | 30  | BNL243           | CER0168  | 5.45 | 3.99  | 0.07   | 0.63  | 0.12  | -0.07 | -0.05 |
|                 | 16  | Gh56             | NAU5120  | 30  | BNL243           | CER0168  | 5.37 | 3.21  | 0.42   | 0.56  | 0.27  | -0.19 | -0.07 |
| RILV population |     |                  |          |     |                  |          |      |       |        |       |       |       |       |
| <i>t1</i>       | 1   | SWU14514         | Gh120    | 1   | ICR03725         | ICR03724 | 6.81 | 3.44  | 0.52   | 0.18  | 0.05  | 0.05  | -0.10 |
|                 | 1   | SWU11632         | SWU21958 | 3   | NAU2742          | SWU12841 | 5.14 | 2.38  | 0.60   | 0.16  | 0.03  | 0.08  | -0.11 |
|                 | 1   | ICR03724         | SWU11632 | 4   | JESPR234         | BNL530   | 5.84 | 2.09  | 0.98   | -0.15 | -0.02 | -0.11 | 0.13  |
|                 | 5   | Gh260            | PGML0120 | 5   | Gh260            | PGML0120 | 8.83 | 3.81  | 1.26   | 0.21  | 0.00  | 0.15  | -0.15 |
|                 | 5   | Gh260            | PGML0120 | 6   | CIR291           | CGR5883  | 6.10 | 2.82  | 0.67   | 0.17  | 0.01  | 0.10  | -0.11 |
|                 | 4   | BNL1167          | JESPR234 | 6   | SWU19656         | CGR5124  | 5.56 | 2.36  | 0.73   | 0.15  | 0.04  | 0.08  | -0.12 |
|                 | 6   | MUSB1144         | BNL3650  | 7   | HAU1367          | NAU3181  | 5.37 | 3.10  | 0.35   | -0.18 | -0.04 | -0.04 | 0.08  |
|                 | 6   | MUSB1144         | BNL3650  | 8   | DC20094          | Gh197    | 5.12 | 1.62  | 1.07   | -0.13 | -0.04 | -0.10 | 0.14  |
|                 | 1   | ICR03725         | ICR03724 | 8   | HAU0810          | TMB2904  | 5.55 | 2.31  | 0.60   | 0.15  | 0.01  | 0.09  | -0.10 |
|                 | 1   | ICR03724         | SWU11632 | 10  | SWU19932         | HAU0635  | 6.27 | 2.24  | 0.83   | 0.15  | 0.04  | 0.09  | -0.13 |
|                 | 9   | CGR6876          | BNL1317  | 12  | C2_0115          | SWU16858 | 6.40 | 2.84  | 0.72   | -0.17 | -0.09 | -0.03 | 0.12  |
|                 | 6   | BNL3650          | TMB2940  | 12  | C2_0115          | SWU16858 | 7.91 | 3.33  | 0.93   | -0.18 | -0.08 | -0.06 | 0.13  |
|                 | 2   | CGR6695          | SWU11013 | 12  | ICR03107         | HAU3373  | 5.52 | 2.71  | 0.58   | 0.17  | 0.02  | 0.08  | -0.10 |
|                 | 12  | BNL3261          | Gh568    | 12  | CGR6847          | SWU17197 | 5.91 | 2.22  | 0.87   | -0.15 | -0.05 | -0.08 | 0.13  |
|                 | 7   | C2_0046          | HAU1367  | 12  | COT107           | Gh243    | 5.23 | 1.69  | 0.92   | 0.13  | 0.08  | 0.06  | -0.13 |
|                 | 1   | DPL0790          | ICR03725 | 12  | DPL0400          | HAU2173  | 5.88 | 2.52  | 0.72   | -0.16 | -0.08 | -0.03 | 0.12  |
|                 | 8   | HAU0810          | TMB2904  | 12  | DPL0400          | HAU2173  | 6.42 | 3.06  | 0.66   | -0.18 | -0.04 | -0.07 | 0.12  |
|                 | 12  | C2_0115          | SWU16858 | 13  | CER0165          | SWU13032 | 7.16 | 2.11  | 1.37   | 0.15  | 0.02  | 0.13  | -0.15 |
|                 | 1   | SWU14514         | Gh120    | 13  | SWU13032         | HAU2850  | 5.34 | 2.44  | 0.63   | 0.16  | 0.04  | 0.07  | -0.11 |
|                 | 6   | MUSB1144         | BNL3650  | 13  | CGR5331          | SHIN1462 | 7.07 | 2.97  | 1.12   | 0.17  | 0.01  | 0.12  | -0.13 |
|                 | 12  | Gh243            | DPL0400  | 14  | HAU0883          | CIR228   | 7.63 | 3.17  | 0.82   | 0.18  | 0.05  | 0.08  | -0.13 |
|                 | 1   | ICR03725         | ICR03724 | 14  | DPL0502          | ICR00401 | 6.69 | 2.22  | 1.04   | 0.15  | 0.06  | 0.09  | -0.14 |
|                 | 2   | TMB1268          | SWU11976 | 14  | DPL0502          | ICR00401 | 5.79 | 2.69  | 0.65   | 0.17  | 0.05  | 0.07  | -0.11 |
|                 | 14  | HAU0883          | CIR228   | 14  | ICR01124         | HAU2482  | 6.13 | 3.00  | 0.41   | 0.22  | 0.07  | 0.05  | -0.12 |
|                 | 13  | SWU13032         | HAU2850  | 14  | HAU2482          | NAU4045  | 6.10 | 1.91  | 0.93   | 0.17  | 0.07  | 0.10  | -0.17 |
|                 | 12  | DPL0400          | HAU2173  | 16  | HAU3081          | NAU747   | 5.66 | 1.92  | 1.15   | 0.14  | 0.02  | 0.12  | -0.14 |
|                 | 1   | SWU11632         | SWU21958 | 17  | HAU1413          | CGR5576  | 5.51 | 2.38  | 0.73   | 0.16  | 0.02  | 0.09  | -0.12 |
|                 | 4   | SWU16783         | SWU18876 | 18  | SWU0738          | ICR02849 | 7.98 | 3.88  | 0.84   | 0.20  | 0.04  | 0.09  | -0.13 |
|                 | 15  | NAU3736          | SWU11691 | 18  | SWU0738          | ICR02849 | 5.65 | 1.55  | 1.48   | 0.13  | -0.01 | 0.15  | -0.14 |
|                 | 6   | CGR5124          | SWU19249 | 18  | SWU0738          | ICR02849 | 6.08 | 3.36  | 0.46   | -0.18 | -0.09 | 0.01  | 0.08  |
|                 | 2   | DPL0217          | CGR6695  | 19  | NAU2816          | PGML4342 | 6.02 | 2.44  | 1.15   | 0.16  | 0.01  | 0.13  | -0.13 |
|                 | 17  | HAU1413          | CGR5576  | 19  | NAU2816          | PGML4342 | 8.21 | 3.34  | 0.91   | 0.18  | 0.03  | 0.10  | -0.13 |
|                 | 14  | ICR03105         | ICR01124 | 19  | PGML4342         | NAU2894  | 8.15 | 3.66  | 0.91   | 0.24  | 0.04  | 0.12  | -0.16 |
|                 | 15  | NAU3736          | SWU11691 | 19  | SWU17789         | SWU17882 | 6.09 | 2.86  | 0.60   | -0.17 | -0.03 | -0.07 | 0.11  |
|                 | 14  | DPL0502          | ICR00401 | 20  | SWU20246         | Gh451    | 5.82 | 1.78  | 0.74   | -0.17 | -0.06 | -0.10 | 0.16  |
|                 | 13  | CER0165          | SWU13032 | 21  | BNL1552          | CGR5148  | 6.72 | 3.12  | 0.84   | 0.18  | 0.06  | 0.07  | -0.13 |
|                 | 4   | SWU16783         | SWU18876 | 21  | CGR5748          | PGML2500 | 5.65 | 2.48  | 0.77   | 0.16  | 0.07  | 0.06  | -0.12 |
|                 | 10  | NAU3395          | CAU0234  | 21  | CGR5748          | PGML2500 | 5.56 | 2.94  | 0.68   | -0.17 | 0.02  | -0.11 | 0.09  |
|                 | 8   | DC20094          | Gh197    | 21  | SWU16489         | SWU16360 | 6.63 | 3.09  | 0.59   | -0.18 | -0.07 | -0.04 | 0.11  |
|                 | 5   | Gh260            | PGML0120 | 21  | SWU16408         | BNL3171  | 5.24 | 2.11  | 0.54   | 0.14  | 0.05  | 0.06  | -0.10 |
|                 | 6   | BNL3650          | TMB2940  | 21  | BNL3171          | HAU2937  | 5.26 | 2.09  | 0.66   | 0.14  | 0.03  | 0.08  | -0.11 |
|                 | 21  | SWU16489         | SWU16360 | 23  | CGR5158          | HAU1758  | 11.6 | 5.28  | 1.25   | -0.24 | -0.06 | -0.10 | 0.17  |
|                 | 1   | Gh398            | CGR6129  | 23  | HAU0244          | Gh327    | 8.54 | 3.43  | 1.14   | -0.20 | -0.10 | -0.07 | 0.16  |
|                 | 12  | Gh631            | COT107   | 23  | DC40286          | PGML1434 | 5.78 | 2.13  | 0.73   | -0.15 | -0.09 | -0.03 | 0.12  |
|                 | 17  | HAU1413          | CGR5576  | 23  | NAU5373b         | HAU2648  | 6.55 | 2.80  | 0.74   | -0.17 | -0.03 | -0.09 | 0.12  |

| Stage | Chi | Flanking markers |          | Chj | Flanking markers |          | LOD  | V(AA) | V(AAE) | AA    | AAE1  | AAE2  | AAE3  |
|-------|-----|------------------|----------|-----|------------------|----------|------|-------|--------|-------|-------|-------|-------|
|       | 1   | DPL0790          | ICR03725 | 24  | Gh54             | Gh454    | 5.37 | 2.51  | 0.55   | -0.16 | -0.08 | -0.02 | 0.10  |
|       | 6   | MUSB1144         | BNL3650  | 24  | Gh54             | Gh454    | 6.46 | 3.01  | 0.78   | 0.17  | 0.03  | 0.09  | -0.12 |
|       | 14  | ICR03105         | ICR01124 | 24  | Gh454            | HAU3076  | 5.69 | 2.53  | 0.69   | 0.20  | 0.03  | 0.11  | -0.14 |
|       | 23  | HAU2648          | SWU20501 | 25  | HAU3012          | SWU19676 | 10.0 | 4.21  | 1.71   | 0.21  | 0.05  | 0.13  | -0.18 |
|       | 6   | BNL3650          | TMB2940  | 25  | DPL0377          | SWU19413 | 6.94 | 3.16  | 0.67   | -0.18 | -0.05 | -0.07 | 0.12  |
|       | 2   | DPL0217          | CGR6695  | 25  | SWU19412         | NAU3112  | 5.46 | 2.57  | 0.57   | 0.16  | 0.05  | 0.05  | -0.11 |
|       | 17  | SWU12838a        | HAU1413  | 25  | NAU4964          | HAU1355  | 7.57 | 3.18  | 0.73   | 0.18  | 0.07  | 0.05  | -0.12 |
|       | 4   | BNL530           | SWU16781 | 25  | BNL3098          | HAU1224  | 5.72 | 2.34  | 0.71   | 0.15  | 0.05  | 0.07  | -0.12 |
|       | 6   | CGR5124          | SWU19249 | 26  | CGR6477          | PGML2562 | 5.23 | 1.58  | 0.80   | -0.13 | -0.06 | -0.07 | 0.13  |
|       | 12  | BNL3261          | Gh568    | 27  | Gh247            | CGR5867  | 5.58 | 2.27  | 1.03   | 0.15  | 0.02  | 0.11  | -0.13 |
|       | 10  | HAU0635          | PGML4154 | 28  | BNL3545          | PGML3983 | 7.33 | 3.13  | 0.97   | 0.18  | 0.06  | 0.08  | -0.14 |
|       | 16  | HAU1129          | C2 0011B | 29  | DPL0171          | Gh499    | 5.25 | 2.49  | 0.61   | 0.16  | 0.08  | 0.02  | -0.10 |
|       | 2   | CGR6695          | SWU11013 | 29  | DPL0171          | Gh499    | 6.32 | 3.20  | 0.64   | -0.18 | -0.05 | -0.07 | 0.11  |
|       | 26  | CGR6477          | PGML2562 | 29  | DPL0171          | Gh499    | 7.12 | 1.97  | 1.20   | 0.14  | 0.01  | 0.13  | -0.14 |
|       | 4   | SWU16783         | SWU18876 | 30  | TMB1638          | CGR6812  | 5.82 | 2.81  | 0.59   | -0.17 | -0.03 | -0.08 | 0.11  |
|       | 16  | HAU3081          | NAU747   | 31  | DPL0057          | NAU3109  | 6.45 | 3.08  | 0.66   | -0.18 | -0.03 | -0.08 | 0.11  |
|       | 2   | SWU12490         | DPL0200  | 31  | CGR6772          | HAU0355  | 5.30 | 2.04  | 0.86   | -0.14 | -0.06 | -0.07 | 0.13  |
|       | 9   | CGR6876          | BNL1317  | 31  | SWU16780         | SWU16735 | 5.59 | 2.41  | 0.88   | 0.15  | -0.02 | 0.12  | -0.10 |
|       | 23  | PGML1434         | MUSB994  | 31  | SWU16780         | SWU16735 | 5.08 | 2.63  | 0.39   | 0.16  | 0.05  | 0.04  | -0.09 |
|       | 30  | TMB1638          | CGR6812  | 31  | SWU16730         | SWU16721 | 5.87 | 2.27  | 0.82   | -0.15 | -0.04 | -0.09 | 0.13  |
|       | 13  | CGR5331          | SHIN1462 | 32  | HAU1000          | TMB1931  | 7.78 | 3.27  | 0.96   | 0.18  | 0.04  | 0.09  | -0.14 |
|       | 12  | HAU3373          | CGR6847  | 33  | BNL3661          | PGML4891 | 6.03 | 2.63  | 0.56   | 0.16  | 0.07  | 0.04  | -0.11 |
|       | 31  | DPL0057          | NAU3109  | 33  | BNL3661          | PGML4891 | 5.47 | 2.88  | 0.47   | 0.17  | 0.03  | 0.07  | -0.10 |
|       | 12  | HAU3373          | CGR6847  | 34  | JESPR297         | ICR00647 | 5.81 | 3.21  | 0.44   | -0.18 | -0.04 | -0.06 | 0.09  |
|       | 25  | BNL3098          | HAU1224  | 34  | JESPR297         | ICR00647 | 8.04 | 3.64  | 0.95   | -0.19 | -0.05 | -0.08 | 0.14  |
|       | 1   | Gh398            | CGR6129  | 35  | NAU2139          | TMB1152  | 9.93 | 4.80  | 1.00   | -0.22 | -0.06 | -0.08 | 0.14  |
|       | 9   | CGR5009          | CGR6771  | 36  | CGR5548          | SWU20700 | 5.45 | 2.52  | 0.67   | 0.16  | 0.05  | 0.07  | -0.12 |
|       | 26  | CGR6477          | PGML2562 | 36  | CGR5548          | SWU20700 | 8.35 | 3.59  | 0.94   | -0.19 | -0.11 | -0.03 | 0.13  |
|       | 1   | DPL0790          | ICR03725 | 36  | CGR5548          | SWU20700 | 5.09 | 1.95  | 0.74   | 0.14  | 0.09  | 0.04  | -0.12 |
|       | 23  | NAU5373b         | HAU2648  | 37  | DPL0131          | DPL0777  | 8.31 | 3.55  | 1.09   | -0.19 | -0.03 | -0.11 | 0.14  |
|       | 25  | SWU19676         | NAU2968  | 37  | DPL0131          | DPL0777  | 6.78 | 3.12  | 0.84   | 0.18  | 0.04  | 0.09  | -0.13 |
|       | 19  | NAU2816          | PGML4342 | 37  | DPL0131          | DPL0777  | 5.69 | 2.52  | 0.65   | 0.16  | 0.07  | 0.04  | -0.11 |
|       | 9   | SWU15413         | NAU0483  | 37  | DPL0777          | HAU0423  | 7.19 | 3.65  | 0.53   | 0.19  | 0.05  | 0.06  | -0.11 |
|       | 37  | DPL0131          | DPL0777  | 38  | NAU2450          | PGML1942 | 7.27 | 2.76  | 1.06   | 0.17  | 0.07  | 0.08  | -0.15 |
|       | 10  | SWU19932         | HAU0635  | 38  | NAU2450          | PGML1942 | 5.20 | 1.55  | 0.85   | -0.13 | -0.06 | -0.07 | 0.13  |
|       | 23  | SHIN0272         | NAU2140  | 39  | HAU2022          | BNL0827  | 7.19 | 2.01  | 1.65   | -0.16 | -0.05 | -0.14 | 0.19  |
|       | 33  | BNL3661          | PGML4891 | 39  | HAU2022          | BNL0827  | 5.12 | 2.11  | 0.86   | 0.15  | 0.04  | 0.09  | -0.13 |
|       | 36  | SWU20658         | CGR6154  | 39  | HAU2022          | BNL0827  | 6.21 | 2.92  | 0.59   | 0.17  | 0.05  | 0.06  | -0.11 |
|       | 5   | Gh260            | PGML0120 | 39  | NAU5480          | DPL0270  | 6.30 | 2.35  | 1.28   | -0.16 | 0.00  | -0.14 | 0.14  |
|       | 26  | HAU1571          | CGR6477  | 39  | NAU5480          | DPL0270  | 6.33 | 2.59  | 0.81   | 0.16  | 0.03  | 0.09  | -0.12 |
|       | 1   | Gh120            | Gh398    | 39  | NAU5480          | DPL0270  | 5.20 | 2.07  | 0.69   | -0.14 | -0.03 | -0.08 | 0.11  |
|       | 21  | SWU16493         | SWU16489 | 39  | DPL0270          | SWU16437 | 8.00 | 2.95  | 1.03   | -0.17 | -0.06 | -0.08 | 0.14  |
|       | 29  | DPL0171          | Gh499    | 39  | DPL0270          | SWU16437 | 7.52 | 2.46  | 1.15   | -0.16 | -0.08 | -0.07 | 0.15  |
|       | 3   | NAU2742          | SWU12841 | 39  | DPL0270          | SWU16437 | 8.50 | 3.80  | 0.74   | 0.20  | 0.03  | 0.09  | -0.12 |
| t2    | 1   | SWU14514         | Gh120    | 1   | ICR03295         | SWU10912 | 6.58 | 3.53  | 0.42   | 0.63  | -0.01 | 0.25  | -0.25 |
|       | 1   | DPL0790          | ICR03725 | 2   | DPL0217          | CGR6695  | 5.82 | 2.24  | 0.82   | 0.50  | 0.15  | 0.27  | -0.42 |
|       | 5   | Gh260            | PGML0120 | 5   | Gh260            | PGML0120 | 10.4 | 5.53  | 0.49   | 0.83  | 0.12  | 0.23  | -0.35 |
|       | 4   | BNL1167          | JESPR234 | 6   | MUSB1144         | BNL3650  | 5.02 | 2.90  | 0.29   | 0.55  | 0.02  | 0.20  | -0.22 |
|       | 5   | Gh260            | PGML0120 | 6   | CIR291           | CGR5883  | 6.34 | 3.74  | 0.37   | 0.63  | 0.00  | 0.24  | -0.25 |

| Stage | Chi | Flanking markers | Chj      | Flanking markers | LOD      | V(AA)     | V(AAE) | AA   | AAE1 | AAE2  | AAE3  |       |       |
|-------|-----|------------------|----------|------------------|----------|-----------|--------|------|------|-------|-------|-------|-------|
|       | 6   | MUSB1144         | BNL3650  | 8                | DC20094  | Gh197     | 6.88   | 3.43 | 0.57 | -0.60 | -0.03 | -0.28 | 0.32  |
|       | 1   | ICR03725         | ICR03724 | 10               | SWU19932 | HAU0635   | 5.00   | 2.51 | 0.34 | 0.52  | 0.14  | 0.13  | -0.27 |
|       | 12  | BNL3261          | Gh568    | 12               | CGR6847  | SWU17197  | 5.38   | 2.68 | 0.43 | -0.55 | 0.01  | -0.27 | 0.26  |
|       | 1   | DPL0790          | ICR03725 | 12               | DPL0400  | HAU2173   | 6.03   | 3.49 | 0.16 | -0.62 | -0.06 | -0.12 | 0.18  |
|       | 8   | HAU0810          | TMB2904  | 12               | DPL0400  | HAU2173   | 7.71   | 4.27 | 0.35 | -0.68 | -0.08 | -0.20 | 0.28  |
|       | 6   | MUSB1144         | BNL3650  | 13               | CGR5331  | SHIN1462  | 6.70   | 3.33 | 0.50 | 0.60  | 0.08  | 0.24  | -0.31 |
|       | 12  | Gh243            | DPL0400  | 14               | HAU0883  | CIR228    | 6.62   | 3.70 | 0.25 | 0.63  | 0.12  | 0.12  | -0.23 |
|       | 1   | ICR03725         | ICR03724 | 14               | DPL0502  | ICR00401  | 7.35   | 3.16 | 0.78 | 0.58  | 0.16  | 0.24  | -0.41 |
|       | 10  | NAU3395          | CAU0234  | 14               | ICR03943 | ICR12281  | 5.54   | 2.92 | 0.35 | -0.58 | 0.00  | -0.24 | 0.24  |
|       | 14  | ICR03943         | ICR12281 | 14               | ICR03943 | ICR12281  | 8.25   | 3.72 | 0.60 | 0.76  | 0.21  | 0.20  | -0.41 |
|       | 12  | DPL0400          | HAU2173  | 16               | HAU3081  | NAU747    | 6.52   | 3.17 | 0.75 | 0.58  | -0.03 | 0.36  | -0.33 |
|       | 2   | TMB1268          | SWU11976 | 16               | NAU747   | HAU1129   | 5.71   | 2.95 | 0.47 | 0.56  | -0.02 | 0.28  | -0.26 |
|       | 12  | ICR03107         | HAU3373  | 17               | NAU3995  | SWU12838a | 6.77   | 3.30 | 1.08 | 0.59  | -0.21 | 0.48  | -0.27 |
|       | 4   | SWU16783         | SWU18876 | 18               | SWU0738  | ICR02849  | 9.63   | 4.89 | 0.64 | 0.72  | 0.10  | 0.26  | -0.36 |
|       | 15  | NAU3736          | SWU11691 | 18               | SWU0738  | ICR02849  | 5.55   | 2.98 | 0.24 | 0.57  | 0.08  | 0.14  | -0.22 |
|       | 17  | HAU1413          | CGR5576  | 19               | NAU2816  | PGML4342  | 9.01   | 4.84 | 0.36 | 0.71  | 0.09  | 0.18  | -0.27 |
|       | 10  | SWU19932         | HAU0635  | 20               | HAU1314  | SWU20035  | 5.44   | 2.64 | 0.37 | -0.53 | -0.16 | -0.12 | 0.28  |
|       | 13  | CGR5331          | SHIN1462 | 20               | SWU20027 | Gh187     | 6.34   | 3.20 | 0.52 | 0.59  | -0.01 | 0.29  | -0.28 |
|       | 6   | SWU19656         | CGR5124  | 21               | CGR5148  | SHIN0337  | 5.48   | 3.31 | 0.15 | 0.59  | 0.07  | 0.11  | -0.17 |
|       | 14  | ICR00401         | ICR03105 | 21               | CGR5148  | SHIN0337  | 5.82   | 2.61 | 0.45 | 0.63  | 0.12  | 0.24  | -0.36 |
|       | 4   | SWU16783         | SWU18876 | 21               | CGR5748  | PGML2500  | 6.17   | 3.06 | 0.49 | 0.58  | 0.12  | 0.19  | -0.31 |
|       | 8   | DC20094          | Gh197    | 21               | SWU16489 | SWU16360  | 10.0   | 4.59 | 0.90 | -0.71 | -0.11 | -0.31 | 0.43  |
|       | 13  | CER0165          | SWU13032 | 21               | SWU16489 | SWU16360  | 6.43   | 3.03 | 0.87 | 0.58  | -0.06 | 0.40  | -0.35 |
|       | 12  | Gh631            | COT107   | 23               | DC40286  | PGML1434  | 6.51   | 3.33 | 0.46 | -0.61 | -0.02 | -0.27 | 0.29  |
|       | 21  | PGML2500         | CGR6521  | 23               | PGML1434 | MUSB994   | 5.99   | 2.83 | 0.60 | 0.55  | 0.05  | 0.28  | -0.33 |
|       | 1   | ICR03724         | SWU11632 | 23               | HAU2648  | SWU20501  | 5.82   | 3.03 | 0.32 | -0.58 | -0.18 | -0.08 | 0.26  |
|       | 1   | DPL0790          | ICR03725 | 24               | PGML1207 | Gh54      | 7.12   | 3.98 | 0.42 | -0.67 | 0.02  | -0.28 | 0.25  |
|       | 24  | Gh54             | Gh454    | 24               | CGR6079  | SWU13100  | 5.56   | 2.65 | 0.53 | 0.60  | 0.08  | 0.27  | -0.35 |
|       | 15  | NAU3736          | SWU11691 | 25               | SWU19412 | NAU3112   | 5.86   | 2.46 | 0.61 | 0.52  | 0.08  | 0.27  | -0.35 |
|       | 17  | SWU12838a        | HAU1413  | 25               | NAU4964  | HAU1355   | 12.6   | 6.13 | 0.83 | 0.81  | 0.09  | 0.31  | -0.40 |
|       | 12  | HAU3373          | CGR6847  | 26               | HAU1571  | CGR6477   | 5.17   | 2.79 | 0.47 | 0.55  | -0.03 | 0.29  | -0.25 |
|       | 10  | NAU3395          | CAU0234  | 26               | CGR6477  | PGML2562  | 5.95   | 2.86 | 0.54 | 0.55  | 0.05  | 0.27  | -0.32 |
|       | 24  | Gh54             | Gh454    | 27               | Gh247    | CGR5867   | 6.38   | 3.02 | 0.61 | 0.57  | 0.12  | 0.24  | -0.36 |
|       | 16  | HAU1129          | C2 0011B | 29               | DPL0171  | Gh499     | 5.48   | 2.61 | 0.44 | 0.52  | 0.13  | 0.18  | -0.31 |
|       | 1   | SWU21958         | NAU0748  | 29               | DPL0171  | Gh499     | 6.87   | 3.26 | 0.81 | -0.59 | 0.05  | -0.38 | 0.33  |
|       | 12  | CGR6847          | SWU17197 | 30               | TMB1638  | CGR6812   | 5.70   | 2.67 | 0.34 | -0.54 | -0.22 | -0.03 | 0.25  |
|       | 25  | NAU4964          | HAU1355  | 30               | TMB1638  | CGR6812   | 6.68   | 3.22 | 0.42 | -0.59 | -0.24 | -0.05 | 0.29  |
|       | 18  | SWU21718         | SWU0738  | 31               | SWU16735 | SWU16755  | 5.20   | 2.34 | 0.60 | 0.50  | 0.04  | 0.29  | -0.33 |
|       | 30  | TMB1638          | CGR6812  | 31               | SWU16730 | SWU16721  | 7.93   | 3.23 | 1.18 | -0.59 | 0.00  | -0.44 | 0.44  |
|       | 21  | SWU16493         | SWU16489 | 33               | BNL3661  | PGML4891  | 6.36   | 3.27 | 0.50 | 0.60  | -0.03 | 0.30  | -0.27 |
|       | 25  | NAU4964          | HAU1355  | 34               | JESPR297 | ICR00647  | 7.43   | 3.16 | 0.88 | -0.57 | -0.11 | -0.31 | 0.42  |
|       | 1   | Gh398            | CGR6129  | 35               | NAU2139  | TMB1152   | 8.58   | 4.79 | 0.36 | -0.72 | -0.03 | -0.22 | 0.26  |
|       | 4   | JESPR234         | BNL530   | 36               | CGR5548  | SWU20700  | 5.17   | 2.51 | 0.56 | 0.52  | 0.00  | 0.30  | -0.30 |
|       | 26  | CGR6477          | PGML2562 | 36               | CGR5548  | SWU20700  | 7.97   | 4.40 | 0.40 | -0.70 | -0.07 | -0.21 | 0.28  |
|       | 25  | SWU19676         | NAU2968  | 36               | CGR5548  | SWU20700  | 6.38   | 3.39 | 0.41 | 0.61  | 0.06  | 0.22  | -0.28 |
|       | 18  | SWU0738          | ICR02849 | 36               | SWU20658 | CGR6154   | 6.44   | 3.08 | 0.73 | -0.58 | 0.07  | -0.37 | 0.30  |
|       | 32  | TMB0071          | HAU1000  | 36               | SWU20658 | CGR6154   | 5.37   | 2.88 | 0.39 | -0.56 | 0.02  | -0.26 | 0.24  |
|       | 23  | NAU5373b         | HAU2648  | 37               | DPL0131  | DPL0777   | 11.4   | 5.47 | 1.52 | -0.77 | 0.07  | -0.53 | 0.46  |
|       | 32  | HAU1000          | TMB1931  | 37               | DPL0131  | DPL0777   | 5.25   | 1.67 | 1.23 | 0.43  | -0.09 | 0.49  | -0.40 |

| Stage | Chi | Flanking markers |          | Chj | Flanking markers |          | LOD  | V(AA) | V(AAE) | AA    | AAE1  | AAE2  | AAE3  |
|-------|-----|------------------|----------|-----|------------------|----------|------|-------|--------|-------|-------|-------|-------|
|       | 19  | NAU2816          | PGML4342 | 37  | DPL0777          | HAU0423  | 5.83 | 3.02  | 0.37   | 0.56  | 0.08  | 0.20  | -0.27 |
|       | 37  | DPL0131          | DPL0777  | 38  | NAU2450          | PGML1942 | 5.83 | 2.98  | 0.49   | 0.57  | -0.04 | 0.30  | -0.26 |
|       | 36  | SWU20658         | CGR6154  | 39  | HAU2022          | BNL0827  | 5.12 | 3.25  | 0.14   | 0.59  | 0.09  | 0.09  | -0.18 |
|       | 1   | Gh120            | Gh398    | 39  | NAU5480          | DPL0270  | 6.00 | 3.28  | 0.32   | -0.59 | -0.07 | -0.18 | 0.25  |
|       | 21  | SWU16493         | SWU16489 | 39  | DPL0270          | SWU16437 | 7.15 | 3.78  | 0.50   | -0.64 | -0.03 | -0.27 | 0.30  |
|       | 3   | NAU2742          | SWU12841 | 39  | DPL0270          | SWU16437 | 5.98 | 3.24  | 0.30   | 0.59  | 0.08  | 0.17  | -0.25 |
|       | 29  | DPL0171          | Gh499    | 39  | DPL0270          | SWU16437 | 7.01 | 3.35  | 0.68   | -0.60 | -0.01 | -0.32 | 0.34  |
|       | 31  | SWU16755         | SWU16732 | 39  | SWU16437         | SWU16432 | 5.44 | 2.60  | 0.37   | 0.53  | 0.08  | 0.19  | -0.27 |
| t3    | 1   | SWU14514         | Gh120    | 1   | ICR03295         | SWU10912 | 5.33 | 3.70  | 0.23   | 0.91  | -0.26 | -0.04 | 0.30  |
|       | 5   | Gh260            | PGML0120 | 5   | Gh260            | PGML0120 | 7.84 | 5.45  | 0.35   | 1.16  | -0.20 | -0.20 | 0.40  |
|       | 5   | Gh260            | PGML0120 | 6   | CIR291           | CGR5883  | 5.15 | 4.12  | 0.22   | 0.95  | -0.27 | 0.06  | 0.21  |
|       | 1   | HAU2489          | DPL0790  | 6   | SWU19656         | CGR5124  | 5.73 | 3.20  | 0.72   | -0.85 | 0.37  | 0.20  | -0.58 |
|       | 2   | TMB1268          | SWU11976 | 6   | SWU19656         | CGR5124  | 9.03 | 5.35  | 1.22   | 1.07  | -0.52 | -0.17 | 0.69  |
|       | 6   | MUSB1144         | BNL3650  | 8   | DC20094          | Gh197    | 8.80 | 5.77  | 0.45   | -1.11 | 0.40  | -0.03 | -0.36 |
|       | 3   | NAU2742          | SWU12841 | 8   | HAU0810          | TMB2904  | 5.96 | 3.43  | 0.68   | -0.86 | 0.46  | 0.01  | -0.47 |
|       | 2   | CGR6695          | SWU11013 | 12  | CGR6847          | SWU17197 | 5.12 | 3.37  | 0.49   | 0.85  | -0.28 | -0.16 | 0.44  |
|       | 12  | BNL3261          | Gh568    | 12  | Gh243            | DPL0400  | 5.39 | 3.14  | 0.69   | -0.83 | 0.45  | 0.05  | -0.50 |
|       | 1   | DPL0790          | ICR03725 | 12  | DPL0400          | HAU2173  | 6.15 | 4.29  | 0.32   | -0.98 | 0.30  | 0.04  | -0.34 |
|       | 10  | SWU13030         | NAU4967  | 12  | DPL0400          | HAU2173  | 6.01 | 4.06  | 0.54   | 0.94  | -0.45 | 0.08  | 0.37  |
|       | 8   | HAU0810          | TMB2904  | 12  | DPL0400          | HAU2173  | 8.50 | 6.00  | 0.28   | -1.14 | 0.35  | -0.17 | -0.17 |
|       | 6   | MUSB1144         | BNL3650  | 13  | CGR5331          | SHIN1462 | 5.35 | 3.95  | 0.10   | 0.92  | -0.21 | 0.09  | 0.13  |
|       | 6   | SWU19656         | CGR5124  | 14  | HAU0883          | CIR228   | 6.14 | 4.34  | 0.25   | 0.96  | -0.32 | 0.11  | 0.21  |
|       | 4   | BNL1167          | JESPR234 | 14  | DPL0502          | ICR00401 | 5.22 | 3.73  | 0.13   | -0.90 | 0.21  | -0.03 | -0.19 |
|       | 1   | Gh529            | SWU17434 | 14  | HAU2482          | NAU4045  | 5.60 | 3.82  | 0.24   | -1.08 | 0.37  | -0.19 | -0.18 |
|       | 12  | CGR6847          | SWU17197 | 14  | NAU4045          | ICR03943 | 5.42 | 3.89  | 0.29   | 0.98  | -0.32 | -0.01 | 0.33  |
|       | 8   | HAU0810          | TMB2904  | 14  | ICR03943         | ICR12281 | 5.14 | 3.12  | 0.58   | -0.88 | 0.41  | 0.09  | -0.50 |
|       | 14  | ICR03943         | ICR12281 | 14  | ICR03943         | ICR12281 | 6.43 | 4.21  | 0.03   | 1.17  | -0.17 | 0.01  | 0.16  |
|       | 12  | DPL0400          | HAU2173  | 16  | HAU3081          | NAU747   | 8.85 | 5.85  | 0.59   | 1.12  | -0.50 | 0.19  | 0.30  |
|       | 2   | TMB1268          | SWU11976 | 16  | NAU747           | HAU1129  | 8.25 | 5.26  | 0.77   | 1.06  | -0.46 | -0.07 | 0.53  |
|       | 5   | Gh260            | PGML0120 | 17  | SWU12838a        | HAU1413  | 5.14 | 3.78  | 0.12   | -0.90 | 0.21  | -0.04 | -0.18 |
|       | 4   | SWU16783         | SWU18876 | 18  | SWU0738          | ICR02849 | 6.50 | 4.59  | 0.10   | 1.00  | -0.22 | 0.07  | 0.15  |
|       | 15  | NAU3736          | SWU11691 | 18  | SWU0738          | ICR02849 | 6.62 | 3.95  | 0.64   | 0.92  | -0.39 | -0.10 | 0.50  |
|       | 17  | HAU1413          | CGR5576  | 19  | NAU2816          | PGML4342 | 5.50 | 4.12  | 0.09   | 0.93  | -0.18 | 0.10  | 0.07  |
|       | 10  | SWU19932         | HAU0635  | 20  | HAU1314          | SWU20035 | 6.37 | 4.29  | 0.41   | -0.96 | 0.30  | 0.10  | -0.40 |
|       | 12  | HAU3373          | CGR6847  | 20  | SWU20027         | Gh187    | 5.99 | 3.94  | 0.46   | -0.92 | 0.38  | 0.00  | -0.38 |
|       | 13  | CGR5331          | SHIN1462 | 20  | SWU20027         | Gh187    | 5.58 | 3.81  | 0.19   | 0.91  | -0.28 | 0.12  | 0.16  |
|       | 6   | SWU19656         | CGR5124  | 21  | CGR5148          | SHIN0337 | 6.55 | 4.68  | 0.35   | 1.00  | -0.32 | -0.02 | 0.34  |
|       | 8   | DC20094          | Gh197    | 21  | SWU16489         | SWU16360 | 7.43 | 5.36  | 0.16   | -1.08 | 0.25  | -0.04 | -0.20 |
|       | 16  | HAU3081          | NAU747   | 21  | SWU16361         | SWU16408 | 5.14 | 2.61  | 0.63   | 0.75  | -0.52 | 0.22  | 0.30  |
|       | 2   | SWU11976         | SWU12001 | 21  | BNL3171          | HAU2937  | 5.02 | 3.37  | 0.33   | 0.85  | -0.35 | 0.05  | 0.30  |
|       | 12  | DPL0400          | HAU2173  | 22  | BNL4030          | NAU2026  | 5.76 | 2.93  | 0.85   | 0.80  | -0.56 | 0.07  | 0.49  |
|       | 12  | SWU17197         | Gh631    | 23  | DC40286          | PGML1434 | 5.43 | 4.23  | 0.12   | -0.96 | 0.17  | 0.06  | -0.23 |
|       | 2   | DPL0217          | CGR6695  | 23  | PGML1434         | MUSB994  | 6.93 | 3.85  | 0.87   | 0.91  | -0.54 | 0.01  | 0.53  |
|       | 1   | SWU14616         | SWU14077 | 23  | HAU2648          | SWU20501 | 5.93 | 4.54  | 0.23   | 0.99  | -0.23 | -0.08 | 0.30  |
|       | 23  | MUSB994          | NAU2238  | 23  | HAU2648          | SWU20501 | 5.92 | 3.60  | 0.73   | -0.88 | 0.37  | 0.18  | -0.55 |
|       | 1   | DPL0790          | ICR03725 | 24  | PGML1207         | Gh54     | 6.05 | 4.22  | 0.43   | -0.98 | 0.22  | 0.22  | -0.44 |
|       | 24  | Gh54             | Gh454    | 24  | HAU3076          | SWU13121 | 6.19 | 4.16  | 0.42   | 1.12  | -0.39 | 0.01  | 0.37  |
|       | 17  | SWU12838a        | HAU1413  | 25  | NAU4964          | HAU1355  | 13.6 | 8.31  | 0.81   | 1.34  | -0.54 | 0.03  | 0.50  |
|       | 12  | HAU3373          | CGR6847  | 26  | MGHES31          | HAU1571  | 5.06 | 2.92  | 0.50   | 0.80  | -0.45 | 0.14  | 0.31  |

| Stage | Chi | Flanking markers |          | Chj | Flanking markers |          | LOD  | V(AA) | V(AAE) | AA    | AAE1  | AAE2  | AAE3  |
|-------|-----|------------------|----------|-----|------------------|----------|------|-------|--------|-------|-------|-------|-------|
|       | 10  | HAU0635          | PGML4154 | 28  | BNL3545          | PGML3983 | 5.49 | 3.59  | 0.34   | 0.88  | -0.32 | -0.03 | 0.34  |
|       | 26  | CGR6477          | PGML2562 | 29  | DPL0171          | Gh499    | 6.70 | 3.85  | 0.65   | 0.91  | -0.45 | -0.01 | 0.46  |
|       | 1   | NAU0748          | NAU2697  | 29  | Gh111            | Gh27     | 5.37 | 3.63  | 0.30   | -0.88 | 0.34  | -0.06 | -0.28 |
|       | 12  | CGR6847          | SWU17197 | 30  | TMB1638          | CGR6812  | 5.62 | 4.15  | 0.19   | -0.95 | 0.14  | 0.15  | -0.29 |
|       | 6   | SWU19656         | CGR5124  | 30  | TMB1638          | CGR6812  | 6.19 | 3.81  | 0.43   | 0.90  | -0.32 | -0.08 | 0.40  |
|       | 21  | BNL3171          | HAU2937  | 30  | TMB1638          | CGR6812  | 5.02 | 3.14  | 0.27   | -0.83 | 0.31  | 0.01  | -0.32 |
|       | 6   | CGR5355          | SWU19656 | 31  | CGR6772          | HAU0355  | 5.33 | 3.15  | 0.67   | 0.82  | -0.36 | -0.16 | 0.52  |
|       | 1   | CGR6129          | ICR03295 | 31  | SWU16780         | SWU16735 | 5.86 | 4.27  | 0.45   | 0.95  | -0.26 | -0.17 | 0.43  |
|       | 30  | TMB1638          | CGR6812  | 31  | SWU16730         | SWU16721 | 6.44 | 4.29  | 0.10   | -0.97 | 0.21  | -0.02 | -0.20 |
|       | 21  | SWU16493         | SWU16489 | 33  | BNL3661          | PGML4891 | 7.77 | 4.42  | 0.65   | 0.98  | -0.52 | 0.18  | 0.34  |
|       | 12  | HAU3373          | CGR6847  | 34  | JESPR297         | ICR00647 | 5.40 | 3.26  | 0.40   | -0.85 | 0.34  | 0.05  | -0.39 |
|       | 25  | BNL3098          | HAU1224  | 34  | JESPR297         | ICR00647 | 6.22 | 4.20  | 0.30   | -0.93 | 0.33  | -0.24 | -0.09 |
|       | 1   | Gh120            | Gh398    | 35  | NAU2139          | TMB1152  | 8.07 | 5.59  | 0.41   | -1.10 | 0.29  | 0.12  | -0.41 |
|       | 7   | CGR5372          | C2_0046  | 36  | CGR5548          | SWU20700 | 5.14 | 2.85  | 0.73   | 0.80  | -0.42 | -0.15 | 0.57  |
|       | 8   | HAU0810          | TMB2904  | 36  | CGR5548          | SWU20700 | 5.10 | 3.60  | 0.27   | -0.89 | 0.12  | 0.21  | -0.33 |
|       | 32  | TMB0071          | HAU1000  | 36  | CER0167          | SWU20658 | 5.67 | 3.70  | 0.29   | -0.89 | 0.32  | -0.04 | -0.29 |
|       | 18  | SWU0738          | ICR02849 | 36  | SWU20658         | CGR6154  | 5.22 | 3.59  | 0.28   | -0.88 | 0.33  | -0.06 | -0.27 |
|       | 33  | BNL3661          | PGML4891 | 36  | SWU20658         | CGR6154  | 6.16 | 3.47  | 0.73   | 0.87  | -0.50 | 0.02  | 0.48  |
|       | 10  | NAU3395          | CAU0234  | 36  | SWU20658         | CGR6154  | 5.29 | 3.44  | 0.29   | -0.86 | 0.33  | -0.06 | -0.27 |
|       | 23  | NAU5373b         | HAU2648  | 37  | DPL0131          | DPL0777  | 10.3 | 6.97  | 0.61   | -1.23 | 0.52  | -0.23 | -0.29 |
|       | 25  | NAU2968          | DPL0377  | 37  | DPL0131          | DPL0777  | 5.49 | 3.07  | 0.90   | 0.82  | -0.08 | -0.50 | 0.58  |
|       | 2   | SWU11976         | SWU12001 | 37  | BNL5602          | JESPR251 | 5.37 | 3.84  | 0.27   | -0.91 | 0.29  | 0.01  | -0.30 |
|       | 24  | PGML1207         | Gh54     | 37  | BNL5602          | JESPR251 | 5.33 | 3.30  | 0.66   | -0.85 | 0.34  | 0.20  | -0.54 |
|       | 10  | HAU0635          | PGML4154 | 38  | NAU2450          | PGML1942 | 8.28 | 5.16  | 0.65   | 1.05  | -0.48 | 0.05  | 0.43  |
|       | 37  | DPL0131          | DPL0777  | 38  | NAU2450          | PGML1942 | 5.59 | 3.83  | 0.36   | 0.92  | -0.34 | -0.01 | 0.35  |
|       | 1   | SWU14514         | Gh120    | 39  | NAU5480          | DPL0270  | 6.08 | 3.81  | 0.47   | -0.90 | 0.32  | 0.11  | -0.43 |
|       | 21  | CGR6521          | Gh450    | 39  | NAU5480          | DPL0270  | 7.64 | 5.61  | 0.13   | -1.10 | 0.24  | -0.10 | -0.14 |
|       | 29  | DPL0171          | Gh499    | 39  | DPL0270          | SWU16437 | 9.24 | 5.94  | 0.78   | -1.13 | 0.53  | -0.06 | -0.47 |
|       | 3   | NAU2742          | SWU12841 | 39  | DPL0270          | SWU16437 | 5.50 | 3.91  | 0.11   | 0.92  | -0.20 | 0.03  | 0.17  |
| t4    | 1   | SWU14514         | Gh120    | 1   | ICR03295         | SWU10912 | 5.02 | 2.99  | 0.59   | 0.84  | -0.43 | -0.05 | 0.49  |
|       | 1   | DPL0790          | ICR03725 | 2   | DPL0217          | CGR6695  | 5.01 | 3.28  | 0.20   | 0.88  | -0.30 | 0.21  | 0.10  |
|       | 5   | Gh260            | PGML0120 | 5   | Gh260            | PGML0120 | 7.71 | 4.76  | 0.71   | 1.13  | -0.47 | -0.08 | 0.55  |
|       | 1   | DPL0790          | ICR03725 | 6   | CGR5355          | SWU19656 | 5.58 | 3.21  | 1.02   | -0.88 | 0.48  | 0.21  | -0.69 |
|       | 2   | TMB1268          | SWU11976 | 6   | SWU19656         | CGR5124  | 8.68 | 4.94  | 1.19   | 1.06  | -0.57 | -0.12 | 0.69  |
|       | 6   | MUSB1144         | BNL3650  | 8   | DC20094          | Gh197    | 8.27 | 4.92  | 0.72   | -1.06 | 0.55  | -0.13 | -0.42 |
|       | 3   | NAU2742          | SWU12841 | 8   | HAU0810          | TMB2904  | 5.74 | 2.41  | 0.89   | -0.74 | 0.62  | -0.19 | -0.44 |
|       | 3   | SWU12840         | NAU2742  | 12  | ICR03107         | HAU3373  | 5.55 | 2.89  | 0.93   | 0.82  | -0.57 | 0.00  | 0.58  |
|       | 6   | CGR6749          | NAU3186  | 12  | HAU3373          | CGR6847  | 5.14 | 2.59  | 0.99   | 0.77  | -0.48 | -0.16 | 0.64  |
|       | 1   | NAU2697          | SWU0320  | 12  | CGR6847          | SWU17197 | 5.28 | 3.25  | 0.33   | -0.86 | 0.34  | -0.01 | -0.33 |
|       | 10  | SWU13030         | NAU4967  | 12  | DPL0400          | HAU2173  | 8.98 | 4.09  | 1.39   | 0.97  | -0.74 | 0.10  | 0.63  |
|       | 8   | HAU0810          | TMB2904  | 12  | DPL0400          | HAU2173  | 7.48 | 4.87  | 0.47   | -1.06 | 0.45  | -0.11 | -0.34 |
|       | 6   | SWU19656         | CGR5124  | 14  | HAU0883          | CIR228   | 7.18 | 4.69  | 0.44   | 1.03  | -0.44 | 0.16  | 0.28  |
|       | 4   | BNL1167          | JESPR234 | 14  | DPL0502          | ICR00401 | 5.21 | 3.53  | 0.23   | -0.90 | 0.32  | -0.13 | -0.18 |
|       | 1   | Gh529            | SWU17434 | 14  | HAU2482          | NAU4045  | 6.23 | 3.64  | 0.56   | -1.11 | 0.59  | -0.23 | -0.36 |
|       | 9   | MUSS139          | PGML2830 | 14  | HAU2482          | NAU4045  | 5.27 | 2.51  | 0.87   | 0.92  | -0.74 | 0.16  | 0.58  |
|       | 12  | DPL0400          | HAU2173  | 14  | HAU2482          | NAU4045  | 5.97 | 3.22  | 0.62   | 1.05  | -0.61 | 0.09  | 0.53  |
|       | 8   | HAU0810          | TMB2904  | 14  | ICR03943         | ICR12281 | 5.66 | 2.99  | 0.82   | -0.90 | 0.58  | -0.03 | -0.55 |
|       | 14  | ICR03943         | ICR12281 | 14  | ICR03943         | ICR12281 | 5.78 | 3.45  | 0.43   | 1.06  | -0.50 | -0.03 | 0.53  |
|       | 12  | DPL0400          | HAU2173  | 16  | HAU3081          | NAU747   | 10.8 | 6.66  | 0.94   | 1.23  | -0.64 | 0.18  | 0.46  |



| Stage | Chi | Flanking markers  | Chj | Flanking markers  | LOD  | V(AA) | V(AAE) | AA    | AAE1  | AAE2  | AAE3  |
|-------|-----|-------------------|-----|-------------------|------|-------|--------|-------|-------|-------|-------|
|       | 2   | TMB1268 SWU11976  | 16  | NAU747 HAU1129    | 8.29 | 4.55  | 1.12   | 1.02  | -0.60 | -0.04 | 0.64  |
|       | 4   | SWU16783 SWU18876 | 18  | SWU0738 ICR02849  | 5.05 | 3.05  | 0.41   | 0.84  | -0.42 | 0.10  | 0.32  |
|       | 15  | NAU3736 SWU11691  | 18  | SWU0738 ICR02849  | 6.23 | 3.21  | 1.07   | 0.86  | -0.53 | -0.13 | 0.66  |
|       | 17  | HAU1413 CGR5576   | 19  | NAU2816 PGML4342  | 5.12 | 3.64  | 0.16   | 0.90  | -0.25 | 0.08  | 0.17  |
|       | 10  | SWU19932 HAU0635  | 20  | HAU1314 SWU20035  | 6.75 | 4.46  | 0.47   | -1.01 | 0.35  | 0.09  | -0.44 |
|       | 12  | HAU3373 CGR6847   | 20  | SWU20027 Gh187    | 5.31 | 2.84  | 0.65   | -0.80 | 0.48  | -0.01 | -0.47 |
|       | 13  | CGR5331 SHIN1462  | 20  | SWU20027 Gh187    | 5.50 | 2.98  | 0.53   | 0.83  | -0.49 | 0.28  | 0.21  |
|       | 6   | SWU19656 CGR5124  | 21  | CGR5148 SHIN0337  | 5.20 | 2.82  | 0.54   | 0.80  | -0.44 | 0.03  | 0.41  |
|       | 10  | SWU19932 HAU0635  | 21  | CGR5148 SHIN0337  | 5.06 | 2.91  | 0.49   | 0.82  | -0.35 | -0.10 | 0.45  |
|       | 8   | DC20094 Gh197     | 21  | SWU16489 SWU16360 | 7.82 | 4.83  | 0.56   | -1.06 | 0.50  | -0.13 | -0.37 |
|       | 16  | HAU3081 NAU747    | 21  | SWU16361 SWU16408 | 5.43 | 2.27  | 1.26   | 0.72  | -0.68 | 0.05  | 0.63  |
|       | 12  | DPL0400 HAU2173   | 22  | BNL4030 NAU2026   | 7.46 | 2.89  | 1.24   | 0.82  | -0.73 | 0.18  | 0.55  |
|       | 16  | HAU1129 C2 0011B  | 23  | DC40286 PGML1434  | 5.71 | 3.51  | 0.56   | 0.89  | -0.47 | 0.08  | 0.40  |
|       | 2   | DPL0217 CGR6695   | 23  | PGML1434 MUSB994  | 5.68 | 2.70  | 1.00   | 0.78  | -0.62 | 0.08  | 0.54  |
|       | 1   | SWU14616 SWU14077 | 23  | HAU2648 SWU20501  | 6.23 | 3.79  | 0.66   | 0.93  | -0.45 | -0.05 | 0.50  |
|       | 24  | Gh54 Gh454        | 24  | HAU3076 SWU13121  | 6.43 | 3.76  | 0.58   | 1.09  | -0.61 | 0.03  | 0.58  |
|       | 3   | NAU2742 SWU12841  | 25  | NAU4964 HAU1355   | 5.20 | 2.31  | 0.79   | 0.73  | -0.59 | 0.17  | 0.42  |
|       | 17  | SWU12838a HAU1413 | 25  | NAU4964 HAU1355   | 14.0 | 6.92  | 1.51   | 1.27  | -0.81 | 0.21  | 0.60  |
|       | 12  | HAU3373 CGR6847   | 26  | HAU1571 CGR6477   | 5.80 | 2.76  | 1.17   | 0.79  | -0.60 | -0.06 | 0.66  |
|       | 10  | HAU0635 PGML4154  | 28  | BNL3545 PGML3983  | 7.43 | 4.14  | 0.97   | 0.97  | -0.55 | -0.06 | 0.61  |
|       | 26  | CGR6477 PGML2562  | 29  | DPL0171 Gh499     | 7.47 | 3.41  | 1.12   | 0.88  | -0.57 | -0.09 | 0.66  |
|       | 6   | BNL3650 TMB2940   | 29  | Gh111 Gh27        | 5.59 | 3.03  | 0.67   | 0.83  | -0.51 | 0.06  | 0.45  |
|       | 25  | NAU4964 HAU1355   | 30  | TMB1638 CGR6812   | 5.28 | 3.24  | 0.32   | -0.88 | 0.37  | -0.05 | -0.32 |
|       | 1   | CGR6129 ICR03295  | 31  | SWU16780 SWU16735 | 5.25 | 3.32  | 0.57   | 0.87  | -0.41 | -0.06 | 0.47  |
|       | 16  | CGR5506 CGR5925   | 31  | SWU16735 SWU16755 | 5.60 | 3.21  | 0.58   | -0.86 | 0.50  | -0.15 | -0.35 |
|       | 30  | TMB1638 CGR6812   | 31  | SWU16730 SWU16721 | 6.20 | 3.86  | 0.46   | -0.95 | 0.35  | 0.10  | -0.45 |
|       | 13  | NAU3398 CGR5331   | 33  | BNL3661 PGML4891  | 5.34 | 2.78  | 0.67   | -0.80 | 0.54  | -0.15 | -0.39 |
|       | 21  | SWU16493 SWU16489 | 33  | BNL3661 PGML4891  | 8.01 | 3.40  | 1.33   | 0.89  | -0.72 | 0.09  | 0.63  |
|       | 25  | BNL3098 HAU1224   | 34  | JESPR297 ICR00647 | 5.14 | 3.08  | 0.45   | -0.83 | 0.44  | -0.18 | -0.26 |
|       | 10  | SWU19932 HAU0635  | 35  | NAU2139 TMB1152   | 5.33 | 2.71  | 0.66   | -0.83 | 0.55  | -0.30 | -0.25 |
|       | 1   | Gh398 CGR6129     | 35  | NAU2139 TMB1152   | 7.98 | 4.39  | 1.32   | -1.01 | 0.54  | 0.21  | -0.75 |
|       | 12  | CGR6847 SWU17197  | 35  | NAU2139 TMB1152   | 6.36 | 2.66  | 1.11   | 0.79  | -0.72 | 0.30  | 0.42  |
|       | 7   | CGR5372 C2 0046   | 36  | CGR5548 SWU20700  | 6.35 | 3.60  | 0.94   | 0.93  | -0.49 | -0.15 | 0.65  |
|       | 25  | SWU19676 NAU2968  | 36  | CGR5548 SWU20700  | 6.91 | 4.35  | 0.63   | 1.00  | -0.43 | -0.06 | 0.50  |
|       | 21  | BNL1552 CGR5148   | 36  | CER0167 SWU20658  | 5.03 | 2.35  | 0.86   | 0.74  | -0.54 | -0.03 | 0.57  |
|       | 32  | TMB0071 HAU1000   | 36  | CER0167 SWU20658  | 6.63 | 3.34  | 0.93   | -0.88 | 0.62  | -0.14 | -0.49 |
|       | 33  | BNL3661 PGML4891  | 36  | SWU20658 CGR6154  | 6.99 | 3.30  | 1.04   | 0.87  | -0.66 | 0.13  | 0.53  |
|       | 23  | NAU5373b HAU2648  | 37  | DPL0131 DPL0777   | 10.2 | 5.74  | 1.22   | -1.16 | 0.73  | -0.19 | -0.54 |
|       | 25  | NAU2968 DPL0377   | 37  | DPL0131 DPL0777   | 5.52 | 2.61  | 1.37   | 0.78  | -0.29 | -0.50 | 0.79  |
|       | 21  | CGR5748 PGML2500  | 37  | DPL0131 DPL0777   | 5.21 | 2.96  | 0.63   | 0.83  | -0.47 | 0.00  | 0.46  |
|       | 10  | HAU0635 PGML4154  | 38  | NAU2450 PGML1942  | 7.11 | 3.60  | 0.86   | 0.91  | -0.57 | 0.06  | 0.51  |
|       | 37  | DPL0131 DPL0777   | 38  | NAU2450 PGML1942  | 6.55 | 3.57  | 0.92   | 0.91  | -0.52 | -0.09 | 0.61  |
|       | 31  | CGR6772 HAU0355   | 38  | NAU2450 PGML1942  | 5.44 | 2.76  | 0.56   | 0.79  | -0.49 | 0.16  | 0.33  |
|       | 1   | SWU14514 Gh120    | 39  | NAU5480 DPL0270   | 5.84 | 3.43  | 0.67   | -0.88 | 0.42  | 0.09  | -0.51 |
|       | 21  | CGR6521 Gh450     | 39  | NAU5480 DPL0270   | 6.15 | 3.90  | 0.40   | -0.95 | 0.42  | -0.13 | -0.28 |
|       | 29  | Gh111 Gh27        | 39  | DPL0270 SWU16437  | 7.72 | 3.52  | 1.04   | -0.90 | 0.65  | -0.12 | -0.53 |
|       | 3   | NAU2742 SWU12841  | 39  | DPL0270 SWU16437  | 6.34 | 3.43  | 0.70   | 0.89  | -0.53 | 0.08  | 0.45  |

Chi and Chj represent the linkage group number of the loci being tested in the analysis

Flanking markers in bold are those flanking M-QTLs identified by inclusive composite interval mapping in additional table S5

AA is the epistatic effect between loci *i* and *j*

AAE is the effect of the environmental interaction of epistasis

AAE1, AAE2 and AAE3 indicate the epistatic effects of QTL × environment interactions in E1, E2 and E3, respectively

V(AA)% and V(AAE)%, percentage of the total variation explained by the AA and AAE

**Table S9** Epistatic effects and environmental interactions detected for boll number per plant in BCF<sub>1</sub> and BCVF<sub>1</sub> populations using two-locus analysis by inclusive composite interval mapping

| Stage                       | Chi | Flanking markers |          | Chj | Flanking markers |           | LOD  | V(AA) | V(AAE) | AA    | AAE1  | AAE2  | AAE3  |
|-----------------------------|-----|------------------|----------|-----|------------------|-----------|------|-------|--------|-------|-------|-------|-------|
| BCF <sub>1</sub> population |     |                  |          |     |                  |           |      |       |        |       |       |       |       |
| <i>t1</i>                   | 1   | BNL2827a         | NAU6367  | 1   | NAU3384          | CGR5663   | 5.93 | 2.31  | 0.00   | -0.18 | -0.09 | -0.03 | 0.12  |
|                             | 1   | NAU3177          | ICR03724 | 2   | SWU11887         | SWU11976  | 10.1 | 5.26  | 1.49   | -0.18 | -0.12 | 0.02  | 0.10  |
|                             | 1   | SWU11191         | BNL2827b | 7   | SWU10064         | NAU3181   | 5.44 | 2.20  | 1.39   | 0.11  | 0.12  | -0.04 | -0.08 |
|                             | 4   | ICR01729         | SWU16781 | 9   | NAU1282          | CGR6771   | 5.07 | 2.68  | 0.71   | 0.13  | 0.06  | 0.03  | -0.09 |
|                             | 1   | BNL2827a         | NAU6367  | 11  | NAU3390          | NAU2460   | 5.22 | 2.23  | 1.42   | -0.12 | -0.11 | -0.01 | 0.12  |
|                             | 11  | NAU3390          | NAU2460  | 11  | NAU1014          | ICR10344  | 5.49 | 2.15  | 1.44   | -0.11 | -0.07 | -0.06 | 0.13  |
|                             | 7   | CER0036          | PGML1916 | 14  | SWU14545         | SWU14543  | 5.80 | 0.93  | 2.67   | 0.07  | 0.12  | 0.05  | -0.17 |
|                             | 9   | NAU5474          | Gh158    | 16  | NAU862           | CGR6802   | 5.82 | 1.97  | 1.58   | 0.11  | 0.10  | 0.03  | -0.13 |
|                             | 12  | DPL0303          | COT107   | 17  | NAU3765          | SWU14627  | 5.28 | 1.72  | 1.24   | -0.10 | -0.04 | -0.08 | 0.12  |
|                             | 14  | SWU14545         | SWU14543 | 18  | SWU22281         | SWU21800  | 5.35 | 3.06  | 0.23   | -0.13 | -0.03 | -0.03 | 0.05  |
|                             | 10  | HAU0635          | NAU2139  | 18  | CIR099           | NAU748    | 5.51 | 1.97  | 1.20   | 0.11  | 0.04  | 0.08  | -0.12 |
|                             | 9   | HAU1618          | NAU2873  | 18  | NAU748           | SWU22192  | 7.36 | 1.81  | 2.17   | -0.10 | -0.06 | -0.10 | 0.16  |
|                             | 1   | CGR6129          | DPL0790  | 20  | SWU20246         | SWU20501a | 5.57 | 3.32  | 0.36   | 0.14  | 0.04  | 0.03  | -0.06 |
|                             | 14  | SWU13909         | TMB0071  | 20  | SWU20035         | DPL0319   | 5.27 | 3.36  | 0.53   | 0.14  | 0.07  | -0.06 | -0.01 |
|                             | 5   | SWU20913         | Gh260    | 21  | SWU16651         | SWU16645  | 5.55 | 2.05  | 2.17   | -0.11 | -0.15 | 0.02  | 0.13  |
|                             | 7   | NAU1357          | SWU10067 | 22  | SWU21533         | DPL0562   | 5.47 | 2.34  | 1.24   | -0.12 | -0.09 | -0.03 | 0.12  |
|                             | 10  | Gh320            | HAU0635  | 24  | Gh298            | SWU13133  | 6.03 | 2.76  | 1.13   | -0.13 | -0.05 | -0.07 | 0.12  |
|                             | 21  | SWU16488         | SWU16138 | 27  | SWU11384         | ICR11885  | 5.40 | 2.76  | 0.77   | -0.13 | -0.05 | -0.05 | 0.10  |
|                             | 5   | TMB1296          | HAU1603  | 27  | CGR6857          | ICR11205  | 5.58 | 3.54  | 0.39   | 0.14  | 0.07  | -0.04 | -0.03 |
| <i>t2</i>                   | 1   | NAU3177          | ICR03724 | 2   | PGML0700         | SWU12016  | 9.65 | 3.89  | 1.71   | -0.35 | -0.33 | 0.15  | 0.18  |
|                             | 1   | NAU2218          | SWU11191 | 9   | Gh27             | SWU15194  | 5.68 | 2.95  | 0.38   | -0.30 | -0.15 | 0.04  | 0.11  |
|                             | 5   | PGML1917         | SWU17715 | 9   | PGML2830         | CGR6876   | 7.28 | 3.17  | 1.11   | 0.32  | 0.18  | 0.08  | -0.26 |
|                             | 4   | SWU21617         | SWU11855 | 10  | BNL2960          | SWU20511  | 5.09 | 1.11  | 1.57   | -0.19 | -0.09 | -0.21 | 0.31  |
|                             | 5   | SWU20917         | NAU6240  | 10  | Gh320            | HAU0635   | 5.28 | 1.94  | 1.49   | -0.25 | 0.07  | -0.29 | 0.22  |
|                             | 1   | SWU10912         | DPL0090  | 14  | CIR228           | BNL2485   | 5.32 | 1.83  | 1.12   | 0.24  | 0.19  | 0.07  | -0.26 |
|                             | 13  | DPL0894          | SWU10800 | 14  | CIR228           | BNL2485   | 5.14 | 2.10  | 1.19   | 0.26  | 0.23  | 0.02  | -0.24 |
|                             | 7   | PGML1916         | SWU10864 | 20  | SWU20246         | SWU20501a | 6.35 | 3.29  | 0.44   | 0.37  | 0.16  | 0.06  | -0.22 |
|                             | 15  | DPL0182          | SWU11691 | 21  | CGR5217          | BNL3442a  | 5.31 | 2.68  | 0.46   | -0.29 | -0.15 | -0.01 | 0.16  |
|                             | 4   | SWU18881         | NAU2701  | 23  | SWU14807         | PGML4185  | 6.05 | 3.09  | 0.94   | -0.32 | -0.14 | -0.10 | 0.24  |
|                             | 13  | SWU22413         | CGR5331  | 23  | SWU14807         | PGML4185  | 7.19 | 3.48  | 1.01   | -0.34 | -0.17 | -0.08 | 0.25  |
|                             | 20  | SWU20035         | DPL0319  | 23  | SWU14807         | PGML4185  | 5.30 | 2.85  | 0.54   | -0.30 | -0.15 | -0.01 | 0.17  |
|                             | 23  | PGML4186         | NAU3100  | 24  | SWU13758         | CGR5423   | 5.63 | 3.14  | 0.39   | -0.31 | -0.13 | 0.00  | 0.14  |
|                             | 17  | ICR03391         | SWU12838 | 26  | Gh64             | SWU17257  | 5.60 | 3.00  | 0.98   | -0.31 | -0.22 | 0.20  | 0.02  |
|                             | 1   | NAU6367          | MUSS422  | 26  | SWU18672         | SWU18681  | 6.00 | 2.37  | 0.99   | -0.28 | -0.02 | -0.22 | 0.24  |
|                             | 5   | PGML4350         | SWU17781 | 27  | ICR11883         | CGR6356   | 5.98 | 2.71  | 0.92   | 0.29  | 0.23  | -0.04 | -0.19 |
|                             | 8   | HAU3177          | NAU4064  | 28  | CGR5534          | SHIN0219  | 5.08 | 2.23  | 0.87   | 0.27  | 0.09  | 0.15  | -0.23 |
|                             | 13  | NAU2893          | Gh157    | 28  | SWU12343         | SWU14060  | 10.2 | 4.01  | 1.65   | 0.36  | 0.10  | 0.22  | -0.32 |
|                             | 11  | NAU3695          | DPL0050b | 28  | NBRI0014         | SWU12107  | 5.04 | 2.31  | 0.78   | 0.27  | 0.17  | 0.04  | -0.21 |
|                             | 13  | DPL0535          | CER0165  | 29  | DC20127          | DPL0252   | 6.92 | 3.18  | 0.76   | 0.32  | 0.05  | 0.16  | -0.21 |
|                             | 7   | NAU1357          | SWU10067 | 29  | BNL3261          | CGR5111   | 5.14 | 1.98  | 0.91   | 0.25  | 0.09  | 0.15  | -0.24 |
|                             | 11  | CER0098          | CGR5421  | 30  | CER0168          | SWU21718  | 5.60 | 2.78  | 0.78   | 0.30  | 0.15  | 0.07  | -0.22 |
| <i>t3</i>                   | 1   | NAU3177          | ICR03724 | 2   | PGML0700         | SWU12016  | 5.29 | 2.85  | 0.48   | -0.39 | -0.21 | 0.04  | 0.18  |
|                             | 2   | PGML0700         | SWU12016 | 8   | NAU4064          | CGR6508   | 5.45 | 3.11  | 0.41   | -0.40 | 0.13  | 0.07  | -0.20 |
|                             | 7   | PGML1916         | SWU10864 | 20  | SWU20246         | SWU20501a | 5.91 | 3.54  | 0.38   | 0.49  | 0.23  | -0.04 | -0.19 |

| Stage            | Chi | Flanking markers |          | Chj | Flanking markers |           | LOD  | V(AA) | V(AAE) | AA    | AAE1  | AAE2  | AAE3  |
|------------------|-----|------------------|----------|-----|------------------|-----------|------|-------|--------|-------|-------|-------|-------|
|                  | 17  | SWU14627         | CGR5871  | 21  | SWU16651         | SWU16645  | 5.29 | 1.69  | 1.68   | 0.30  | -0.16 | -0.27 | 0.42  |
|                  | 4   | BNL530           | SWU21485 | 26  | SWU17432         | SWU17395  | 5.05 | 3.07  | 0.50   | 0.40  | -0.05 | -0.17 | 0.22  |
|                  | 5   | TMB1296          | HAU1603  | 27  | ICR11205         | DPL0847a  | 6.15 | 4.41  | 0.01   | 0.48  | 0.00  | 0.00  | 0.00  |
| <i>t4</i>        | 3   | Gh663            | CGR6528  | 8   | HAU1470a         | SHIN1341  | 6.61 | 3.58  | 0.71   | -0.46 | 0.17  | -0.29 | 0.11  |
|                  | 10  | Gh320            | HAU0635  | 14  | ICR12037         | CGR5675   | 5.02 | 2.93  | 0.39   | -0.41 | 0.21  | -0.14 | -0.07 |
|                  | 2   | PGML0700         | SWU12016 | 18  | CIR099           | NAU748    | 5.18 | 1.98  | 1.52   | 0.34  | -0.13 | -0.28 | 0.41  |
|                  | 7   | PGML1916         | SWU10864 | 20  | SWU20246         | SWU20501a | 6.06 | 3.90  | 0.54   | 0.53  | 0.15  | 0.15  | -0.30 |
|                  | 16  | SWU20341         | DPL0897  | 24  | HAU2504          | SWU13736  | 5.95 | 1.42  | 2.97   | 0.29  | -0.16 | -0.42 | 0.57  |
|                  | 1   | NAU2218          | SWU11191 | 24  | SWU13758         | CGR5423   | 6.64 | 3.86  | 0.56   | -0.47 | 0.07  | 0.18  | -0.24 |
|                  | 10  | ICR00093         | ICR07050 | 29  | BNL3261          | CGR5111   | 6.06 | 4.16  | 0.06   | -0.49 | 0.04  | 0.04  | -0.08 |
| BCVF1 population |     |                  |          |     |                  |           |      |       |        |       |       |       |       |
| <i>t1</i>        | 6   | DPL0590          | NAU2971  | 10  | HAU0635          | PGML4154  | 5.17 | 1.89  | 1.35   | 0.10  | 0.11  | -0.02 | -0.10 |
|                  | 4   | JESPR234         | BNL530   | 12  | Gh243            | DPL0400   | 5.44 | 2.39  | 0.75   | 0.11  | 0.00  | 0.08  | -0.08 |
|                  | 6   | SWU19656         | CGR5124  | 13  | CGR5331          | SHIN1462  | 7.44 | 2.78  | 1.24   | 0.12  | 0.11  | -0.02 | -0.09 |
|                  | 1   | NAU2697          | SWU0320  | 16  | HAU3081          | NAU747    | 5.52 | 1.99  | 1.33   | 0.10  | -0.04 | 0.12  | -0.08 |
|                  | 14  | NAU4045          | ICR03943 | 16  | SWU18366         | SWU18579  | 6.77 | 2.62  | 1.13   | -0.12 | -0.06 | -0.05 | 0.12  |
|                  | 10  | HAU0635          | PGML4154 | 20  | HAU1314          | SWU20035  | 5.26 | 2.41  | 0.81   | 0.11  | 0.01  | 0.08  | -0.09 |
|                  | 12  | CGR6847          | SWU17197 | 21  | CGR5748          | PGML2500  | 5.57 | 1.77  | 1.12   | 0.10  | 0.02  | 0.09  | -0.10 |
|                  | 1   | CGR6784          | NAU3393  | 21  | SWU16489         | SWU16360  | 5.43 | 3.51  | 0.30   | -0.14 | -0.02 | -0.03 | 0.06  |
|                  | 12  | BNL3261          | Gh568    | 23  | HAU0244          | Gh327     | 5.31 | 2.37  | 1.07   | 0.12  | 0.05  | 0.07  | -0.12 |
|                  | 16  | C2_0011B         | SWU10211 | 23  | NAU2140          | DC40286   | 5.07 | 1.00  | 1.73   | 0.07  | 0.11  | 0.03  | -0.13 |
|                  | 16  | HAU1129          | C2_0011B | 24  | Gh54             | Gh454     | 5.84 | 1.87  | 1.58   | -0.10 | -0.11 | 0.00  | 0.12  |
|                  | 14  | HAU2482          | NAU4045  | 25  | NAU2968          | DPL0377   | 6.18 | 2.74  | 0.72   | -0.15 | -0.03 | -0.08 | 0.10  |
|                  | 19  | PGML4342         | NAU2894  | 26  | MGHES31          | HAU1571   | 6.59 | 1.76  | 1.89   | -0.10 | -0.07 | -0.07 | 0.14  |
|                  | 21  | SWU16489         | SWU16360 | 31  | SWU16780         | SWU16735  | 5.15 | 1.35  | 1.78   | 0.09  | 0.14  | -0.06 | -0.09 |
|                  | 31  | DPL0057          | NAU3109  | 31  | SWU16730         | SWU16721  | 6.24 | 2.06  | 1.51   | 0.11  | 0.04  | 0.08  | -0.13 |
|                  | 2   | CGR6695          | SWU11013 | 32  | HAU1000          | TMB1931   | 6.37 | 2.29  | 1.31   | -0.11 | 0.00  | -0.10 | 0.11  |
|                  | 31  | SWU16735         | SWU16755 | 39  | SWU16437         | SWU16432  | 7.17 | 2.11  | 1.44   | 0.11  | 0.09  | 0.04  | -0.12 |
| <i>t2</i>        | 1   | Gh120            | Gh398    | 1   | DPL0790          | ICR03725  | 5.77 | 2.02  | 0.98   | 0.28  | 0.04  | 0.22  | -0.26 |
|                  | 6   | HAU2768          | HAU0483  | 9   | MUSS139          | PGML2830  | 5.10 | 2.12  | 1.15   | -0.28 | 0.05  | -0.28 | 0.23  |
|                  | 6   | DPL0847          | CGR6749  | 10  | SWU19932         | HAU0635   | 6.23 | 2.98  | 1.00   | 0.33  | -0.16 | 0.27  | -0.11 |
|                  | 4   | BNL1167          | JESPR234 | 12  | ICR03107         | HAU3373   | 5.82 | 2.11  | 1.13   | 0.28  | 0.07  | 0.20  | -0.28 |
|                  | 4   | BNL530           | SWU16781 | 15  | NAU3736          | SWU11691  | 5.56 | 2.03  | 0.92   | 0.27  | 0.05  | 0.19  | -0.25 |
|                  | 18  | SWU21718         | SWU0738  | 21  | SWU16493         | SWU16489  | 5.24 | 1.11  | 1.66   | -0.20 | -0.12 | -0.23 | 0.35  |
|                  | 1   | CGR6784          | NAU3393  | 21  | SWU16489         | SWU16360  | 7.12 | 3.47  | 0.98   | -0.36 | -0.06 | -0.20 | 0.26  |
|                  | 5   | Gh260            | PGML0120 | 21  | SWU16361         | SWU16408  | 5.71 | 2.23  | 1.06   | 0.29  | 0.04  | 0.22  | -0.26 |
|                  | 16  | HAU1129          | C2_0011B | 24  | Gh454            | HAU3076   | 5.62 | 1.49  | 1.22   | -0.23 | -0.27 | 0.03  | 0.25  |
|                  | 4   | SWU16783         | SWU18876 | 24  | HAU3076          | SWU13121  | 5.51 | 2.41  | 1.06   | 0.30  | 0.02  | 0.23  | -0.25 |
|                  | 17  | SWU12838a        | HAU1413  | 25  | NAU4964          | HAU1355   | 6.27 | 2.57  | 1.02   | 0.31  | -0.11 | 0.27  | -0.17 |
|                  | 21  | SWU16361         | SWU16408 | 26  | MGHES31          | HAU1571   | 5.02 | 2.99  | 0.35   | 0.33  | -0.04 | 0.15  | -0.12 |
|                  | 16  | HAU1129          | C2_0011B | 29  | DPL0171          | Gh499     | 5.48 | 1.45  | 1.90   | 0.23  | -0.13 | 0.37  | -0.24 |
|                  | 29  | Gh111            | Gh27     | 31  | DPL0057          | NAU3109   | 5.43 | 2.11  | 0.74   | 0.28  | 0.10  | 0.13  | -0.23 |
|                  | 23  | NAU2140          | DC40286  | 31  | CGR6772          | HAU0355   | 6.13 | 2.50  | 0.95   | 0.31  | 0.09  | 0.17  | -0.26 |
|                  | 31  | CGR6772          | HAU0355  | 33  | BNL3661          | PGML4891  | 5.06 | 2.67  | 0.67   | 0.31  | -0.07 | 0.22  | -0.15 |
|                  | 12  | HAU3373          | CGR6847  | 35  | NAU2139          | TMB1152   | 7.13 | 3.35  | 0.59   | 0.35  | -0.03 | 0.19  | -0.17 |
|                  | 9   | MUSS139          | PGML2830 | 36  | SWU20658         | CGR6154   | 6.23 | 2.31  | 1.03   | 0.29  | 0.17  | 0.10  | -0.27 |
|                  | 14  | HAU0883          | CIR228   | 37  | HAU0423          | JESPR154  | 5.48 | 2.53  | 1.02   | 0.30  | -0.05 | 0.26  | -0.21 |
|                  | 31  | SWU16780         | SWU16735 | 38  | NAU2450          | PGML1942  | 6.70 | 2.71  | 1.15   | -0.32 | -0.07 | -0.21 | 0.28  |
| <i>t3</i>        | 21  | CGR6521          | Gh450    | 32  | HAU1000          | TMB1931   | 5.79 | 1.31  | 2.16   | -0.25 | 0.41  | -0.38 | -0.03 |

| Stage     | Chi | Flanking markers  | Chj | Flanking markers | LOD  | V(AA) | V(AAE) | AA   | AAE1  | AAE2 | AAE3 |
|-----------|-----|-------------------|-----|------------------|------|-------|--------|------|-------|------|------|
| <i>t4</i> | 1   | SWU10912 HAU2489  | 1   | DPL0790 ICR03725 | 5.21 | 0.88  | 1.52   | 0.28 | -0.49 | 0.49 | 0.00 |
|           | 14  | ICR03105 ICR01124 | 21  | CGR5748 PGML2500 | 5.97 | 0.31  | 3.26   | 0.17 | -0.70 | 0.58 | 0.12 |

See footnotes of additional table S8 for explanations

**Table S10** Epistatic effects and environmental interactions detected for boll number per plant in two MPH data using two-locus analysis by inclusive composite interval mapping

| Stage            | Chi | Flanking markers  | Chj | Flanking markers   | LOD  | V(AA) | V(AAE) | AA    | AAE1  | AAE2  | AAE3  |
|------------------|-----|-------------------|-----|--------------------|------|-------|--------|-------|-------|-------|-------|
| MPH (XZ hybrid)  |     |                   |     |                    |      |       |        |       |       |       |       |
| <i>t1</i>        | 10  | ICR00093 ICR07050 | 10  | Gh320 HAU0635      | 5.43 | 0.03  | 2.20   | -0.01 | -0.01 | -0.13 | 0.14  |
| <i>t2</i>        | 6   | ICR00143 CGR5108  | 8   | HAU3177 NAU4064    | 5.61 | 1.55  | 2.01   | -0.20 | 0.01  | -0.28 | 0.27  |
|                  | 1   | CGR6129 DPL0790   | 14  | PGML1368 PGML1568  | 5.02 | 1.56  | 1.43   | 0.20  | 0.23  | 0.01  | -0.23 |
|                  | 13  | HAU2558 NAU2893   | 16  | PGML1709 SWU10627  | 5.47 | 2.28  | 1.51   | -0.25 | -0.24 | 0.00  | 0.24  |
|                  | 17  | SWU12818 CGR5576  | 19  | SWU17882 CAU0104   | 5.13 | 1.45  | 1.66   | 0.19  | -0.06 | 0.28  | -0.22 |
|                  | 4   | SWU18881 NAU2701  | 20  | SWU20246 SWU20501a | 5.09 | 1.77  | 1.25   | -0.21 | -0.07 | -0.18 | 0.24  |
|                  | 10  | Gh320 HAU0635     | 23  | PGML4186 NAU3100   | 5.78 | 0.55  | 3.20   | -0.12 | -0.35 | 0.01  | 0.34  |
|                  | 1   | HAU1417 NAU2437   | 28  | SWU12343 SWU14060  | 5.36 | 0.43  | 2.66   | 0.11  | 0.31  | 0.00  | -0.32 |
|                  | 4   | SWU12672 HAU1332  | 29  | C2 0115 ICR03107   | 5.36 | 1.81  | 1.39   | -0.21 | -0.22 | -0.01 | 0.24  |
| <i>t3</i>        | 4   | ICR01729 SWU16781 | 13  | SWU22413 CGR5331   | 5.22 | 1.54  | 1.90   | -0.25 | 0.02  | -0.35 | 0.33  |
|                  | 14  | SWU14224 DPL0565  | 23  | PGML4186 NAU3100   | 5.62 | 2.95  | 1.01   | -0.36 | -0.17 | -0.13 | 0.30  |
|                  | 6   | ICR00143 CGR5108  | 25  | SWU19411 SWU19412  | 5.30 | 2.57  | 1.61   | 0.33  | -0.09 | 0.36  | -0.27 |
|                  | 16  | SWU10038 ICR00016 | 26  | SWU18488 SWU18672  | 5.07 | 2.30  | 1.19   | 0.32  | -0.09 | 0.33  | -0.23 |
| <i>t4</i>        | 3   | SWU12732 SWU12783 | 5   | CGR5025 NBRI0694   | 5.70 | 3.78  | 0.66   | 0.45  | -0.03 | -0.23 | 0.26  |
|                  | 19  | TMB0107 NAU3217   | 24  | SWU13745 Gh273     | 5.05 | 2.81  | 1.03   | 0.39  | -0.20 | -0.13 | 0.34  |
|                  | 5   | SWU13378 SWU17846 | 25  | DPL0282 SWU19763   | 5.32 | 3.40  | 0.49   | -0.43 | 0.18  | 0.04  | -0.21 |
| MPH (XZV hybrid) |     |                   |     |                    |      |       |        |       |       |       |       |
| <i>t1</i>        | 1   | Gh529 SWU17434    | 1   | ICR03725 ICR03724  | 5.02 | 0.94  | 1.78   | -0.07 | -0.01 | -0.12 | 0.13  |
|                  | 1   | HAU2489 DPL0790   | 9   | PGML2830 DC30015   | 8.08 | 3.40  | 1.29   | 0.14  | 0.07  | 0.05  | -0.12 |
|                  | 8   | HAU0810 TMB2904   | 18  | SWU21718 SWU0738   | 6.29 | 1.55  | 1.76   | -0.09 | -0.11 | -0.01 | 0.13  |
|                  | 8   | HAU0810 TMB2904   | 21  | BNL3171 HAU2937    | 5.26 | 2.81  | 0.35   | 0.12  | 0.05  | 0.00  | -0.06 |
|                  | 16  | HAU1129 C2_0011B  | 24  | Gh454 HAU3076      | 6.09 | 2.69  | 1.00   | -0.12 | -0.03 | -0.07 | 0.11  |
|                  | 14  | HAU2482 NAU4045   | 25  | NAU2968 DPL0377    | 6.69 | 2.56  | 0.95   | -0.15 | -0.01 | -0.10 | 0.11  |
|                  | 10  | NAU4967 SWU19932  | 26  | MGHES31 HAU1571    | 5.09 | 1.72  | 1.85   | 0.10  | 0.14  | -0.03 | -0.11 |
|                  | 10  | NAU3395 CAU0234   | 28  | BNL3545 PGML3983   | 6.00 | 2.03  | 1.85   | -0.11 | -0.06 | -0.08 | 0.14  |
|                  | 26  | MGHES31 HAU1571   | 28  | BNL3545 PGML3983   | 5.34 | 2.26  | 1.36   | 0.11  | 0.03  | 0.09  | -0.12 |
|                  | 21  | SWU16493 SWU16489 | 31  | SWU16735 SWU16755  | 5.06 | 1.60  | 1.26   | 0.10  | 0.12  | -0.04 | -0.08 |
|                  | 1   | Gh398 CGR6129     | 35  | NAU2139 TMB1152    | 5.51 | 2.18  | 1.30   | 0.11  | 0.08  | 0.04  | -0.12 |
|                  | 8   | HAU0810 TMB2904   | 37  | BNL5602 JESPR251   | 5.60 | 3.10  | 0.63   | -0.13 | -0.07 | -0.01 | 0.08  |
| <i>t2</i>        | 1   | CGR6784 NAU3393   | 4   | JESPR234 BNL530    | 5.53 | 2.13  | 1.80   | -0.28 | 0.05  | -0.33 | 0.28  |
|                  | 1   | SWU14514 Gh120    | 6   | CGR6749 NAU3186    | 5.03 | 1.29  | 2.26   | -0.21 | 0.13  | -0.39 | 0.27  |
|                  | 2   | SWU11889 JESPR304 | 16  | HAU1129 C2_0011B   | 5.61 | 2.01  | 1.46   | -0.27 | -0.30 | 0.06  | 0.25  |

| Stage | Chi | Flanking markers |          | Chj | Flanking markers |          | LOD  | V(AA) | V(AAE) | AA    | AAE1  | AAE2  | AAE3  |
|-------|-----|------------------|----------|-----|------------------|----------|------|-------|--------|-------|-------|-------|-------|
|       | 14  | ICR03105         | ICR01124 | 21  | SWU16489         | SWU16360 | 9.36 | 3.38  | 2.95   | 0.45  | -0.16 | 0.57  | -0.42 |
|       | 8   | HAU0810          | TMB2904  | 25  | HAU3012          | SWU19676 | 5.15 | 2.78  | 0.55   | 0.32  | 0.02  | 0.16  | -0.18 |
|       | 17  | HAU1413          | CGR5576  | 29  | DPL0171          | Gh499    | 5.12 | 0.84  | 1.85   | -0.17 | -0.15 | -0.22 | 0.36  |
|       | 25  | NAU2968          | DPL0377  | 31  | DPL0057          | NAU3109  | 5.58 | 1.66  | 1.83   | -0.24 | -0.09 | -0.25 | 0.35  |
|       | 23  | HAU0244          | Gh327    | 31  | CGR6772          | HAU0355  | 5.77 | 2.02  | 1.84   | 0.29  | -0.27 | 0.39  | -0.11 |
| t3    | 6   | MUSB1144         | BNL3650  | 8   | DC20094          | Gh197    | 5.58 | 3.12  | 0.51   | 0.49  | -0.28 | 0.10  | 0.18  |
|       | 1   | NAU0748          | NAU2697  | 12  | CGR6847          | SWU17197 | 5.04 | 2.11  | 0.97   | 0.40  | -0.38 | 0.23  | 0.15  |
|       | 1   | Gh529            | SWU17434 | 14  | HAU2482          | NAU4045  | 7.60 | 3.77  | 0.90   | 0.64  | -0.43 | 0.33  | 0.10  |
|       | 6   | DC40417          | MUSB116  | 14  | HAU2482          | NAU4045  | 5.47 | 2.90  | 0.51   | -0.58 | 0.30  | -0.02 | -0.28 |
|       | 13  | SWU13032         | HAU2850  | 15  | NAU3736          | SWU11691 | 5.80 | 2.46  | 0.61   | 0.43  | -0.29 | 0.23  | 0.06  |
|       | 14  | HAU0883          | CIR228   | 17  | HAU1413          | CGR5576  | 5.34 | 2.66  | 0.78   | -0.45 | 0.24  | -0.33 | 0.09  |
|       | 1   | PGML2498         | SWU14490 | 21  | CGR5748          | PGML2500 | 5.10 | 3.04  | 0.46   | -0.48 | 0.22  | 0.02  | -0.23 |
|       | 8   | DC20094          | Gh197    | 21  | SWU16489         | SWU16360 | 5.11 | 3.38  | 0.32   | 0.52  | -0.09 | -0.12 | 0.21  |
|       | 17  | HAU1413          | CGR5576  | 21  | BNL3171          | HAU2937  | 5.68 | 2.02  | 1.22   | 0.39  | -0.42 | 0.11  | 0.32  |
|       | 1   | CGR6129          | ICR03295 | 23  | HAU0244          | Gh327    | 5.07 | 2.70  | 0.70   | 0.49  | -0.19 | -0.15 | 0.34  |
|       | 6   | BNL3650          | TMB2940  | 23  | NAU3588          | NAU5373a | 5.44 | 3.05  | 0.41   | -0.48 | 0.25  | -0.14 | -0.11 |
|       | 24  | Gh54             | Gh454    | 24  | CGR6079          | SWU13100 | 5.37 | 2.77  | 0.30   | -0.52 | 0.35  | -0.17 | -0.19 |
|       | 6   | BNL3650          | TMB2940  | 25  | DPL0377          | SWU19413 | 5.88 | 3.39  | 0.51   | 0.51  | -0.26 | 0.07  | 0.20  |
|       | 12  | HAU3373          | CGR6847  | 26  | HAU1571          | CGR6477  | 5.10 | 2.53  | 0.68   | -0.44 | 0.30  | -0.03 | -0.27 |
|       | 21  | BNL3171          | HAU2937  | 31  | HAU0355          | SWU16777 | 5.67 | 1.71  | 1.50   | -0.36 | 0.48  | -0.22 | -0.26 |
|       | 16  | CGR5506          | CGR5925  | 31  | SWU16730         | SWU16721 | 6.25 | 3.33  | 0.72   | 0.51  | -0.33 | 0.18  | 0.15  |
|       | 6   | MUSB1144         | BNL3650  | 34  | JESPR297         | ICR00647 | 5.03 | 2.98  | 0.27   | 0.48  | -0.20 | 0.05  | 0.15  |
|       | 16  | C2 0011B         | SWU10211 | 37  | DPL0777          | HAU0423  | 6.86 | 3.05  | 0.91   | -0.48 | 0.37  | -0.20 | -0.17 |
|       | 10  | HAU0635          | PGML4154 | 38  | NAU2450          | PGML1942 | 5.86 | 2.19  | 1.08   | -0.41 | 0.39  | -0.10 | -0.29 |
|       | 24  | PGML1207         | Gh54     | 39  | HAU2022          | BNL0827  | 5.00 | 2.78  | 0.50   | 0.46  | -0.21 | -0.06 | 0.27  |
|       | 13  | CER0165          | SWU13032 | 39  | NAU5480          | DPL0270  | 7.19 | 3.63  | 1.90   | -0.52 | 0.25  | 0.28  | -0.53 |
| t4    | 1   | CGR6129          | ICR03295 | 2   | DPL0217          | CGR6695  | 5.14 | 2.26  | 0.45   | -0.44 | 0.27  | -0.17 | -0.10 |
|       | 5   | Gh260            | PGML0120 | 5   | Gh260            | PGML0120 | 5.22 | 2.70  | 0.96   | -0.51 | 0.12  | 0.30  | -0.42 |
|       | 2   | TMB1268          | SWU11976 | 6   | DC40417          | MUSB1164 | 6.44 | 3.57  | 0.57   | -0.55 | 0.26  | 0.02  | -0.28 |
|       | 6   | SWU19656         | CGR5124  | 6   | CGR5124          | SWU19249 | 5.23 | 0.81  | 0.00   | -0.73 | 0.62  | -0.33 | -0.29 |
|       | 6   | MUSB1144         | BNL3650  | 8   | DC20094          | Gh197    | 5.13 | 2.49  | 0.85   | 0.46  | -0.34 | 0.01  | 0.33  |
|       | 1   | Gh398            | CGR6129  | 8   | HAU0810          | TMB2904  | 5.28 | 1.80  | 1.23   | 0.39  | -0.43 | 0.08  | 0.35  |
|       | 9   | DC30015          | SWU15413 | 12  | ICR03107         | HAU3373  | 5.16 | 1.76  | 0.79   | -0.39 | 0.30  | -0.34 | 0.04  |
|       | 6   | CGR6749          | NAU3186  | 12  | HAU3373          | CGR6847  | 6.32 | 2.55  | 1.90   | -0.46 | 0.29  | 0.28  | -0.57 |
|       | 8   | DC20094          | Gh197    | 14  | ICR03943         | ICR12281 | 5.79 | 2.74  | 0.52   | 0.51  | -0.30 | 0.06  | 0.24  |
|       | 14  | HAU0883          | CIR228   | 17  | HAU1413          | CGR5576  | 5.51 | 2.77  | 0.57   | -0.49 | 0.30  | -0.20 | -0.10 |
|       | 13  | CER0165          | SWU13032 | 18  | SWU0738          | ICR02849 | 5.83 | 2.95  | 0.52   | -0.55 | 0.33  | -0.14 | -0.19 |
|       | 1   | NAU0748          | NAU2697  | 21  | CGR5748          | PGML2500 | 5.70 | 2.23  | 1.07   | -0.44 | 0.43  | -0.23 | -0.20 |
|       | 15  | NAU3736          | SWU11691 | 21  | CGR6521          | Gh450    | 5.63 | 2.89  | 0.49   | 0.50  | -0.05 | -0.23 | 0.27  |
|       | 1   | SWU11632         | SWU21958 | 23  | Gh327            | ICR06429 | 5.24 | 1.28  | 1.67   | -0.36 | 0.46  | 0.09  | -0.55 |
|       | 24  | Gh54             | Gh454    | 24  | CGR6079          | SWU13100 | 6.35 | 2.81  | 0.85   | -0.54 | 0.47  | -0.05 | -0.41 |
|       | 6   | BNL3650          | TMB2940  | 25  | NAU2968          | DPL0377  | 5.25 | 3.00  | 0.32   | 0.50  | -0.16 | -0.06 | 0.22  |
|       | 5   | Gh260            | PGML0120 | 25  | SWU19434         | SWU19412 | 7.36 | 3.38  | 1.01   | 0.56  | -0.41 | 0.25  | 0.17  |
|       | 12  | HAU3373          | CGR6847  | 26  | CGR6477          | PGML2562 | 5.82 | 2.53  | 1.01   | -0.47 | 0.35  | 0.03  | -0.38 |
|       | 13  | NAU3398          | CGR5331  | 31  | CGR6772          | HAU0355  | 5.82 | 2.96  | 0.56   | -0.50 | 0.24  | -0.30 | 0.05  |
|       | 9   | CGR6876          | BNL1317  | 31  | SWU16730         | SWU16721 | 5.09 | 2.83  | 0.28   | -0.49 | 0.22  | -0.12 | -0.10 |
|       | 6   | MUSB1144         | BNL3650  | 34  | JESPR297         | ICR00647 | 6.78 | 2.48  | 1.37   | 0.47  | -0.48 | 0.15  | 0.33  |
|       | 25  | SWU19676         | NAU2968  | 36  | CER0167          | SWU20658 | 5.24 | 2.08  | 1.31   | -0.42 | 0.35  | 0.11  | -0.46 |
|       | 24  | PGML1207         | Gh54     | 39  | HAU2022          | BNL0827  | 5.73 | 2.64  | 0.99   | 0.48  | -0.25 | -0.17 | 0.42  |

| Stage | Chi     | Flanking markers | Chj | Flanking markers | LOD     | V(AA) | V(AAE) | AA   | AAE1  | AAE2 | AAE3 |       |
|-------|---------|------------------|-----|------------------|---------|-------|--------|------|-------|------|------|-------|
| 13    | CER0165 | SWU13032         | 39  | NAU5480          | DPL0270 | 6.99  | 2.85   | 2.71 | -0.49 | 0.25 | 0.42 | -0.67 |

See footnotes of additional table S8 for explanations

**Table S11** Correlation between yield and yield components in RIL(V) and BC(V) data sets

| Population | Trait            | Env. | BNP( <i>t</i> 1) | BNP( <i>t</i> 2) | BNP( <i>t</i> 3) | BNP( <i>t</i> 4) | SY     | LY     | BW      |
|------------|------------------|------|------------------|------------------|------------------|------------------|--------|--------|---------|
| RIL        | BNP( <i>t</i> 2) | E1   | 0.65**           |                  |                  |                  |        |        |         |
|            |                  | E2   | 0.70**           |                  |                  |                  |        |        |         |
|            |                  | E3   | 0.74**           |                  |                  |                  |        |        |         |
|            | BNP( <i>t</i> 3) | E1   | 0.47**           | 0.88**           |                  |                  |        |        |         |
|            |                  | E2   | 0.52**           | 0.81**           |                  |                  |        |        |         |
|            |                  | E3   | 0.59**           | 0.75**           |                  |                  |        |        |         |
|            | BNP( <i>t</i> 4) | E1   | 0.32**           | 0.81**           | 0.92**           |                  |        |        |         |
|            |                  | E2   | 0.41**           | 0.72**           | 0.90**           |                  |        |        |         |
|            |                  | E3   | 0.43**           | 0.54**           | 0.77**           |                  |        |        |         |
|            | SY               | E1   | 0.33**           | 0.60**           | 0.63**           | 0.63**           |        |        |         |
|            |                  | E2   | 0.38**           | 0.54**           | 0.63**           | 0.70**           |        |        |         |
|            |                  | E3   | 0.49**           | 0.69**           | 0.76**           | 0.60**           |        |        |         |
|            | LY               | E1   | 0.37**           | 0.61**           | 0.66**           | 0.65**           | 0.96** |        |         |
|            |                  | E2   | 0.41**           | 0.57**           | 0.67**           | 0.72**           | 0.96** |        |         |
|            |                  | E3   | 0.50**           | 0.70**           | 0.81**           | 0.66**           | 0.97** |        |         |
|            | BW               | E1   | 0.27**           | 0.07             | -0.03            | -0.1             | 0.38** | 0.35** |         |
|            |                  | E2   | 0.33**           | 0.18*            | 0                | -0.03            | 0.48** | 0.39** |         |
|            |                  | E3   | 0.09             | 0.23**           | 0.07             | -0.14            | 0.40** | 0.31** |         |
|            | LP               | E1   | 0.12             | 0.09             | 0.11             | 0.08             | -0.14  | 0.13   | -0.12   |
|            |                  | E2   | 0.12             | 0.11             | 0.17*            | 0.11             | -0.13  | 0.16*  | -0.33** |
|            |                  | E3   | 0.19**           | 0.28**           | 0.44**           | 0.43**           | 0.23** | 0.46** | -0.21** |
| RILV       | BNP( <i>t</i> 2) | E1   | 0.79**           |                  |                  |                  |        |        |         |
|            |                  | E2   | 0.83**           |                  |                  |                  |        |        |         |
|            |                  | E3   | 0.67**           |                  |                  |                  |        |        |         |
|            | BNP( <i>t</i> 3) | E1   | 0.71**           | 0.92**           |                  |                  |        |        |         |
|            |                  | E2   | 0.78**           | 0.91**           |                  |                  |        |        |         |
|            |                  | E3   | 0.32**           | 0.80**           |                  |                  |        |        |         |
|            | BNP( <i>t</i> 4) | E1   | 0.53**           | 0.77**           | 0.88**           |                  |        |        |         |
|            |                  | E2   | 0.71**           | 0.87**           | 0.96**           |                  |        |        |         |
|            |                  | E3   | 0.28**           | 0.78**           | 0.95**           |                  |        |        |         |
|            | SY               | E1   | 0.21**           | 0.39**           | 0.50**           | 0.59**           |        |        |         |
|            |                  | E2   | 0.66**           | 0.80**           | 0.86**           | 0.86**           |        |        |         |
|            |                  | E3   | 0.30**           | 0.80**           | 0.95**           | 0.95**           |        |        |         |

| Population        | Trait            | Env.   | BNP( <i>t</i> 1) | BNP( <i>t</i> 2) | BNP( <i>t</i> 3) | BNP( <i>t</i> 4) | SY     | LY      | BW    |
|-------------------|------------------|--------|------------------|------------------|------------------|------------------|--------|---------|-------|
| BCF <sub>1</sub>  | LY               | E1     | 0.27**           | 0.47**           | 0.56**           | 0.62**           | 0.96** |         |       |
|                   |                  | E2     | 0.66**           | 0.79**           | 0.83**           | 0.83**           | 0.96** |         |       |
|                   |                  | E3     | 0.30**           | 0.80**           | 0.95**           | 0.95**           | 1.00** |         |       |
|                   | BW               | E1     | 0.16*            | 0.11             | 0.09             | -0.01            | 0.37** | 0.36**  |       |
|                   |                  | E2     | 0.24**           | 0.19**           | 0.17*            | 0.15             | 0.42** | 0.41**  |       |
|                   |                  | E3     | -0.05            | -0.02            | -0.04            | -0.04            | 0.06   | 0.06    |       |
|                   | LP               | E1     | 0.30**           | 0.40**           | 0.37**           | 0.33**           | 0.20** | 0.45**  | 0.08  |
|                   |                  | E2     | 0.07             | 0.06             | 0                | -0.01            | -0.01  | 0.25**  | 0.04  |
|                   |                  | E3     | 0.09             | 0.18*            | 0.23**           | 0.25**           | 0.21** | 0.29**  | -0.08 |
|                   | BNP( <i>t</i> 2) | E1     | 0.54**           |                  |                  |                  |        |         |       |
|                   |                  | E2     | 0.60**           |                  |                  |                  |        |         |       |
|                   |                  | E3     | 0.69**           |                  |                  |                  |        |         |       |
|                   | BNP( <i>t</i> 3) | E1     | 0.48**           | 0.81**           |                  |                  |        |         |       |
|                   |                  | E2     | 0.38**           | 0.56**           |                  |                  |        |         |       |
|                   |                  | E3     | 0.40**           | 0.55**           |                  |                  |        |         |       |
|                   | BNP( <i>t</i> 4) | E1     | 0.49**           | 0.79**           | 0.88**           |                  |        |         |       |
|                   |                  | E2     | 0.37**           | 0.50**           | 0.80**           |                  |        |         |       |
|                   |                  | E3     | 0.32**           | 0.52**           | 0.55**           |                  |        |         |       |
|                   | SY               | E1     | 0.31**           | 0.44**           | 0.48**           | 0.49**           |        |         |       |
|                   |                  | E2     | 0.40**           | 0.43**           | 0.60**           | 0.65**           |        |         |       |
|                   |                  | E3     | 0.38**           | 0.64**           | 0.66**           | 0.60**           |        |         |       |
|                   | LY               | E1     | 0.30**           | 0.44**           | 0.50**           | 0.52**           | 0.94** |         |       |
|                   |                  | E2     | 0.44**           | 0.43**           | 0.59**           | 0.66**           | 0.95** |         |       |
|                   |                  | E3     | 0.39**           | 0.66**           | 0.67**           | 0.59**           | 0.98** |         |       |
| BW                | E1               | 0.08   | -0.06            | -0.05            | -0.04            | 0.20**           | 0.22** |         |       |
|                   | E2               | 0.32** | 0.21**           | 0.1              | 0.03             | 0.37**           | 0.37** |         |       |
|                   | E3               | 0.1    | 0.15*            | 0.05             | 0.02             | 0.26**           | 0.20** |         |       |
| LP                | E1               | 0.03   | 0.07             | 0.15*            | 0.18*            | 0.04             | 0.36** | 0.11    |       |
|                   | E2               | 0.19*  | 0.11             | 0.1              | 0.18*            | 0.03             | 0.34** | 0.06    |       |
|                   | E3               | 0.16*  | 0.29**           | 0.23**           | 0.1              | 0.16*            | 0.35** | -0.20** |       |
| BCVF <sub>1</sub> | BNP( <i>t</i> 2) | E1     | 0.57**           |                  |                  |                  |        |         |       |
|                   |                  | E2     | 0.60**           |                  |                  |                  |        |         |       |
|                   |                  | E3     | 0.68**           |                  |                  |                  |        |         |       |
|                   | BNP( <i>t</i> 3) | E1     | 0.52**           | 0.76**           |                  |                  |        |         |       |
|                   |                  | E2     | 0.48**           | 0.61**           |                  |                  |        |         |       |
|                   |                  | E3     | 0.40**           | 0.66**           |                  |                  |        |         |       |
|                   | BNP( <i>t</i> 4) | E1     | 0.42**           | 0.56**           | 0.80**           |                  |        |         |       |
|                   |                  | E2     | 0.43**           | 0.58**           | 0.86**           |                  |        |         |       |
|                   |                  | E3     | 0.29**           | 0.56**           | 0.73**           |                  |        |         |       |
|                   | SY               | E1     | 0.11             | 0.13             | 0.22**           | 0.27**           |        |         |       |
|                   |                  | E2     | 0.38**           | 0.50**           | 0.74**           | 0.78**           |        |         |       |
|                   |                  | E3     | 0.32**           | 0.59**           | 0.69**           | 0.72**           |        |         |       |
|                   | LY               | E1     | 0.13             | 0.17*            | 0.24**           | 0.27**           | 0.98** |         |       |



| Population | Trait | Env. | BNP( <i>t</i> 1) | BNP( <i>t</i> 2) | BNP( <i>t</i> 3) | BNP( <i>t</i> 4) | SY     | LY     | BW    |
|------------|-------|------|------------------|------------------|------------------|------------------|--------|--------|-------|
|            |       | E2   | 0.37**           | 0.52**           | 0.73**           | 0.76**           | 0.95** |        |       |
|            |       | E3   | 0.30**           | 0.57**           | 0.67**           | 0.70**           | 0.98** |        |       |
|            | BW    | E1   | 0.17*            | 0.06             | 0.01             | 0.01             | 0.14   | 0.16*  |       |
|            |       | E2   | 0.19*            | 0.05             | 0.03             | -0.06            | 0.19*  | 0.17*  |       |
|            |       | E3   | 0.12             | 0.21**           | 0.04             | -0.02            | 0.20** | 0.19*  |       |
|            | LP    | E1   | 0.17*            | 0.25**           | 0.16*            | 0.07             | 0.15   | 0.34** | 0.16* |
|            |       | E2   | 0.09             | 0.23**           | 0.20**           | 0.21**           | 0.17*  | 0.46** | -0.01 |
|            |       | E3   | -0.01            | 0.09             | 0.08             | 0.12             | 0.16*  | 0.34** | -0.01 |

\*,\*\* Significant at probability of 0.05 and 0.01 respectively. SY, seed cotton yield; LY, lint yield; BNP, bolls per

plant; BW, boll weight; LP, lint percent

**Table S12** Number of QTLs detected in MPH data sets, and number of QTLs overlapping among the three data sets

| Stage      | XZ hybrid |                 |                       | XZV hybrid |                   |                       |
|------------|-----------|-----------------|-----------------------|------------|-------------------|-----------------------|
|            | MPH       | MPH/(BC or RIL) | Overlapping ratio (%) | MPH        | MPH/(BCV or RILV) | Overlapping ratio (%) |
| <i>t</i> 1 | 5         | 2               | 40.0                  | 3          | 2                 | 66.7                  |
| <i>t</i> 2 | 3         | 0               | 0.0                   | 5          | 1                 | 20.0                  |
| <i>t</i> 3 | 2         | 0               | 0.0                   | 5          | 1                 | 20.0                  |
| <i>t</i> 4 | 2         | 2               | 100.0                 | 1          | 1                 | 100.0                 |

### Chr01 XZ

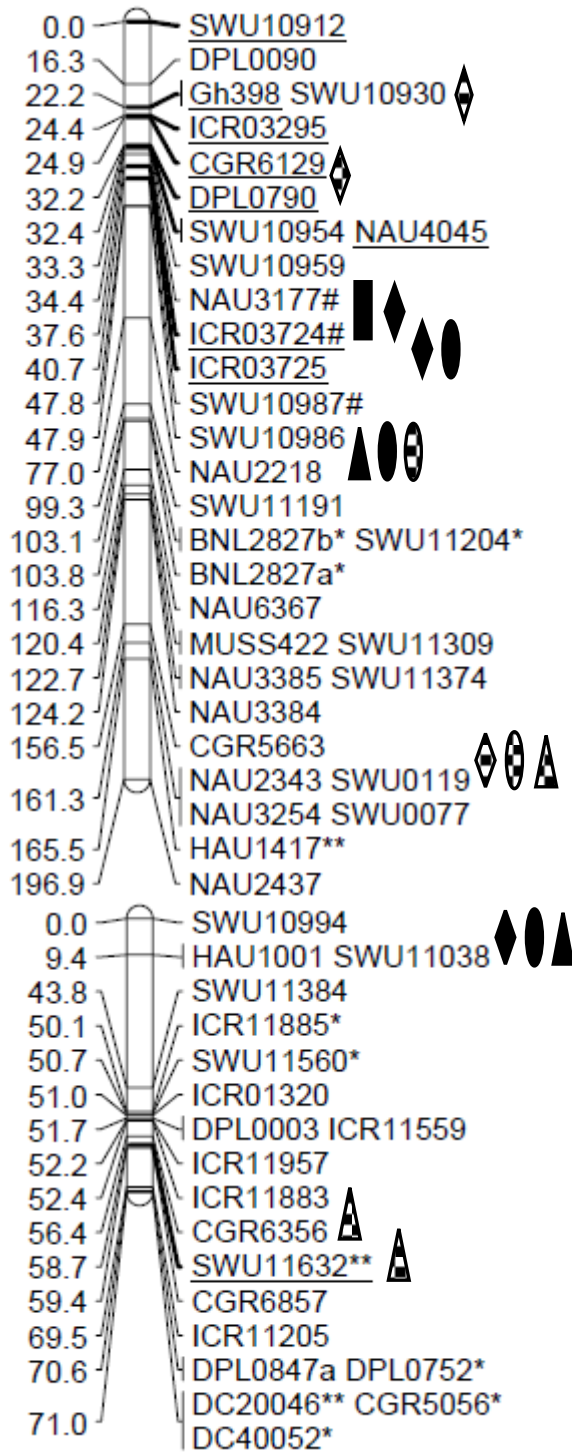

### Chr01 XZV

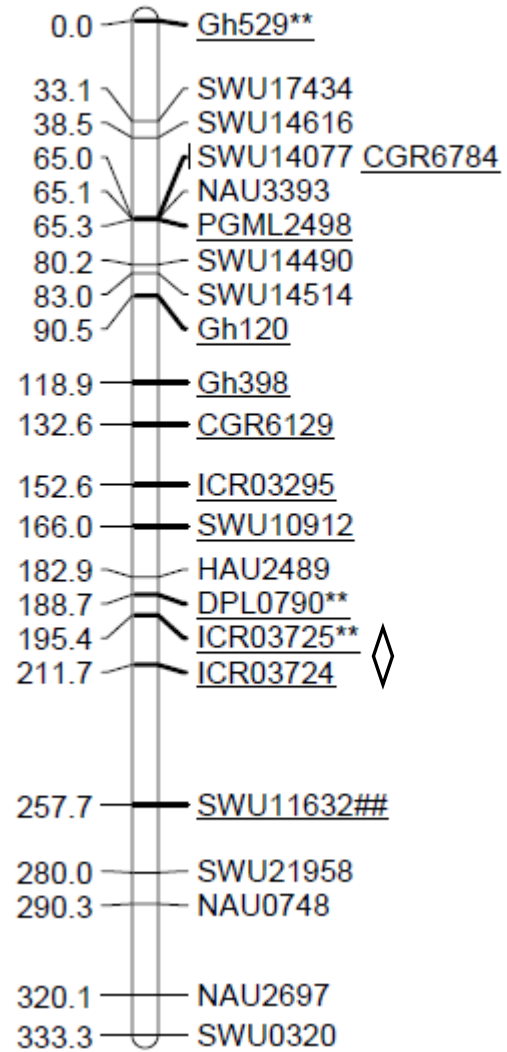

### Chr2 xZ

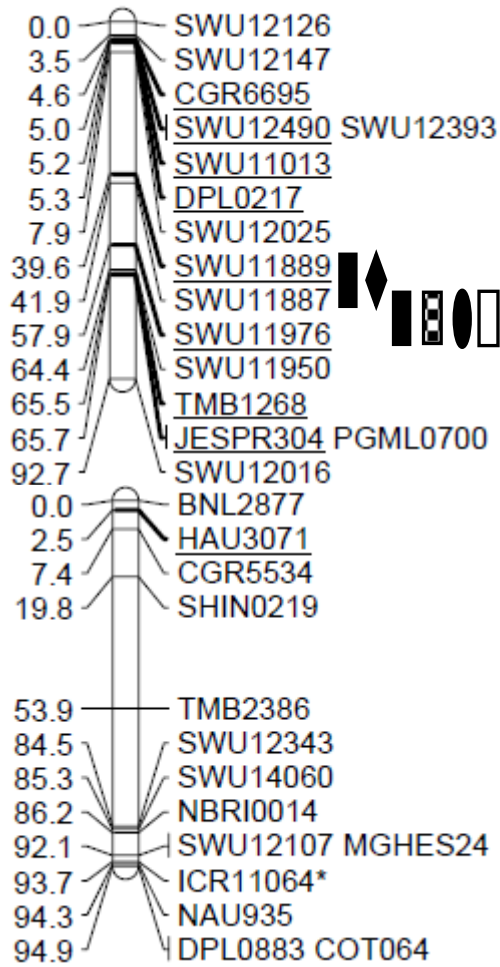

### Chr02 xZV

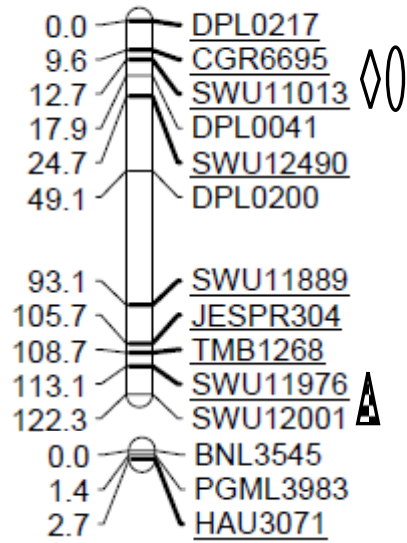

### Chr3 XZ

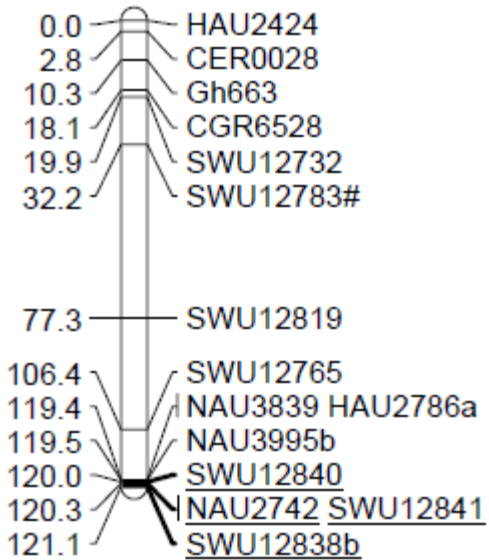

### Chr03 XZV

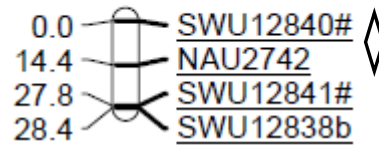

### Chr4 XZ

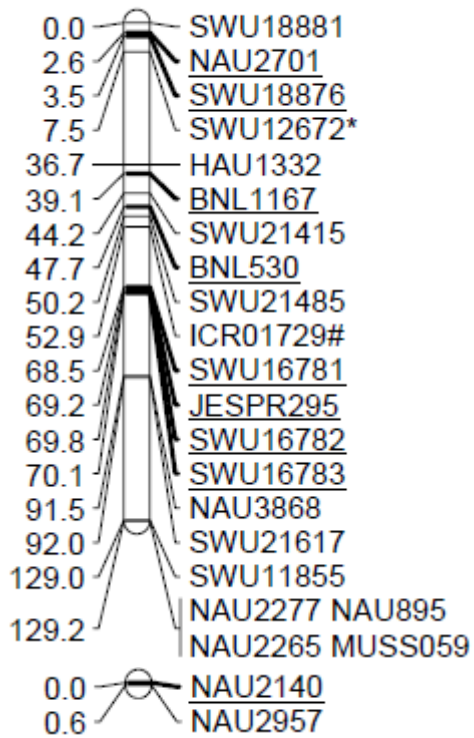

### Chr04 XZV

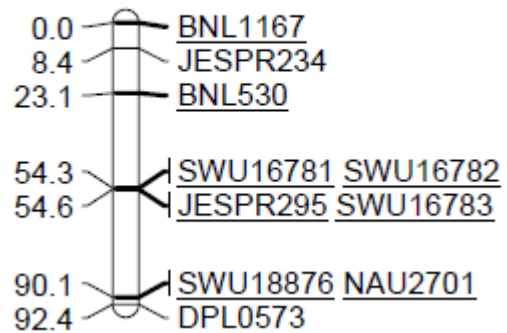

### Chr5 xZ

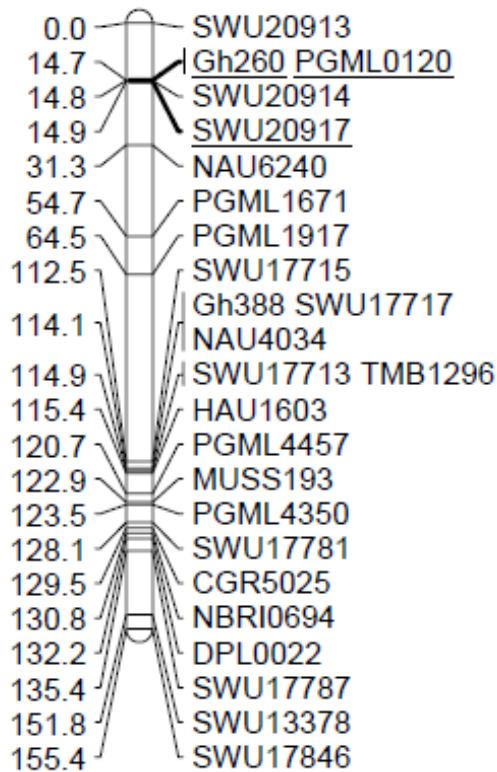

### Chr05 xZV

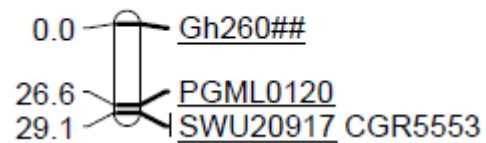

### Chr6 xZ

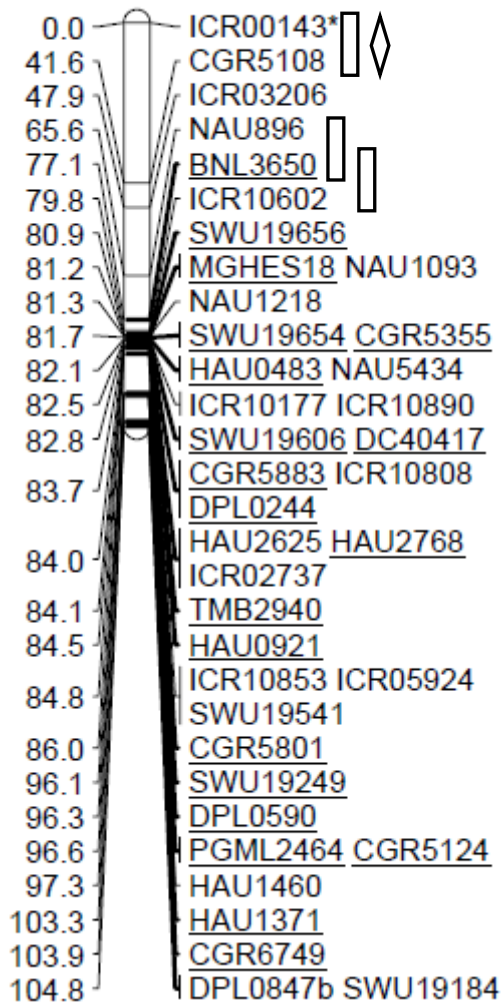

### Chr06 xZV

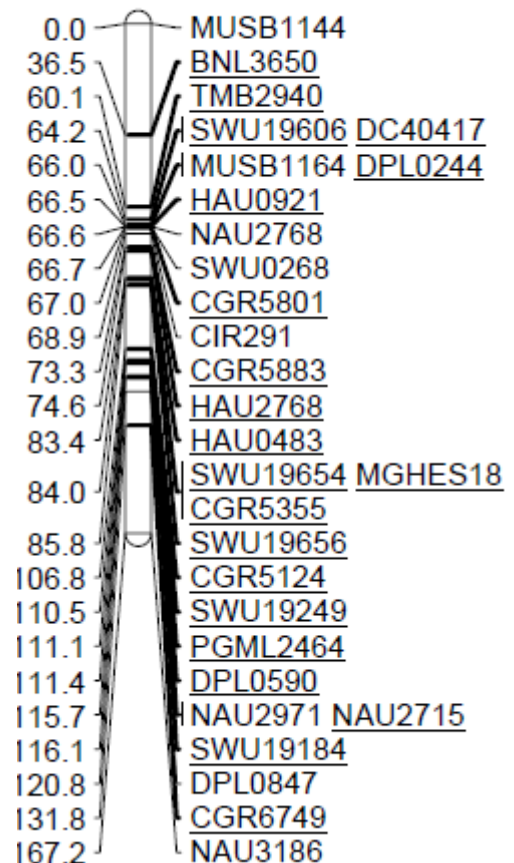

### Chr7 XZ

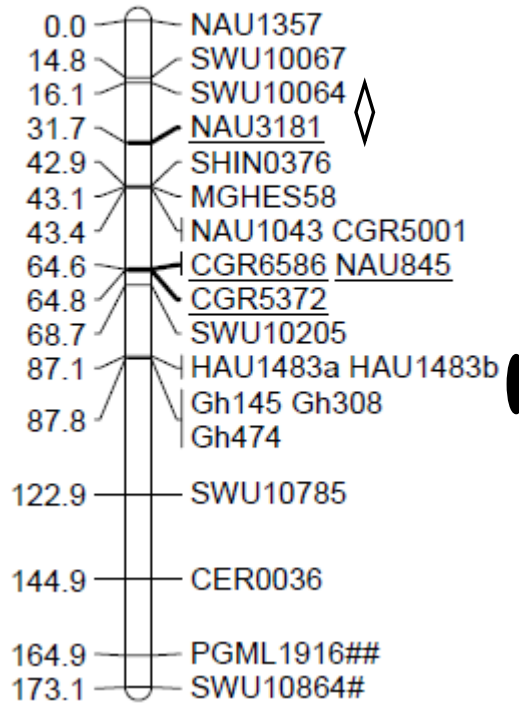

### Chr07 XZV

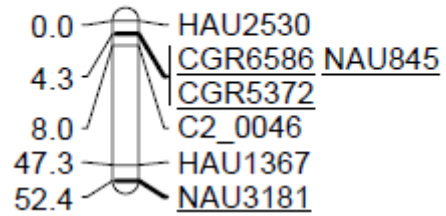

### Chr8 XZ

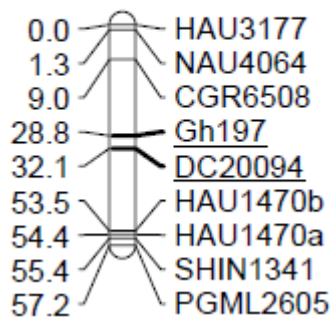

### Chr08 XZV

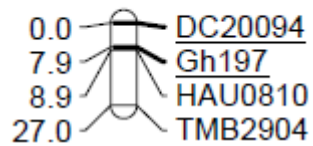

### Chr9 XZ

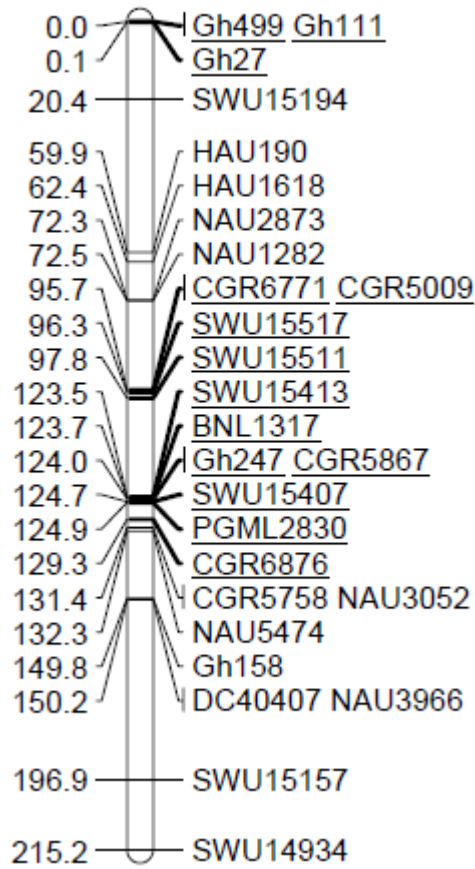

### Chr09 XZV

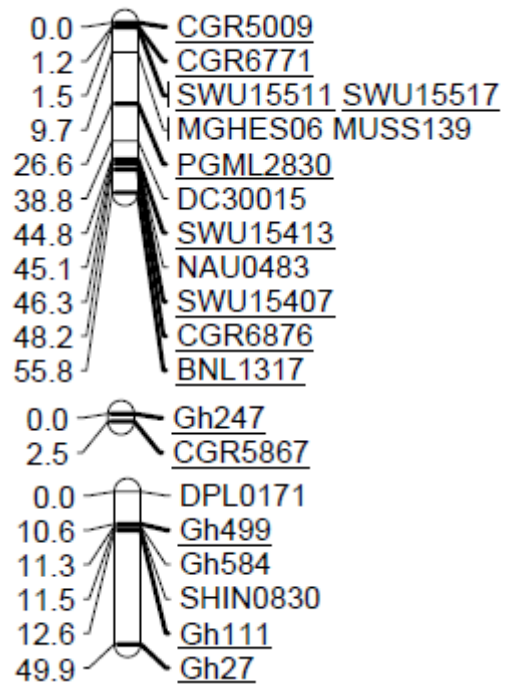

### Chr10 XZ

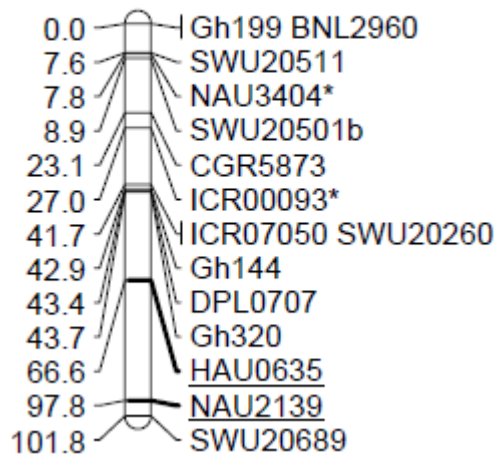

### Chr10 XZV

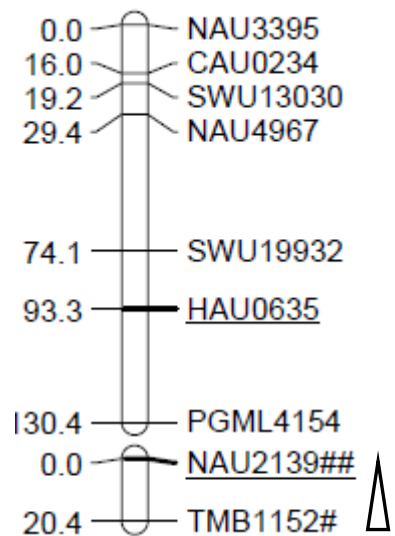

### Chr11 XZ

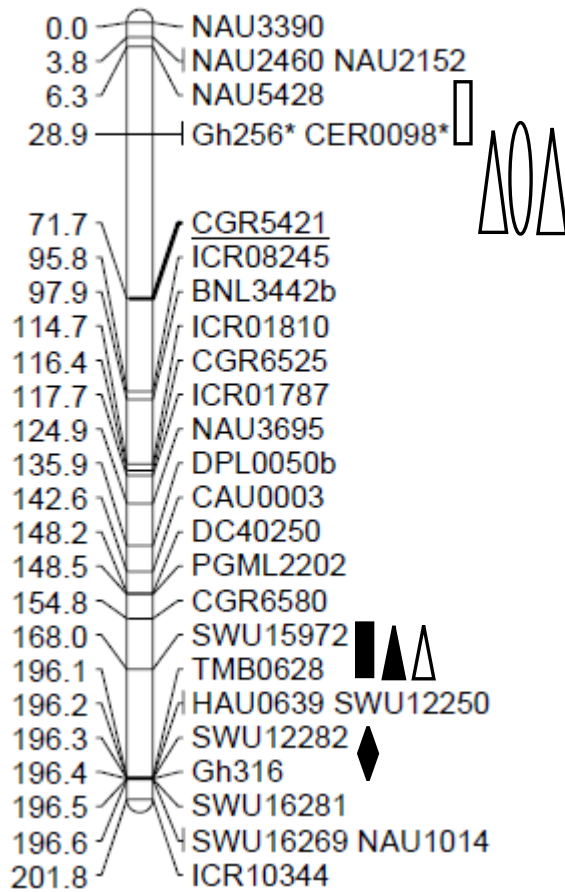

### Chr11 XZV

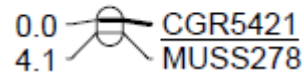

### Chr12 XZ

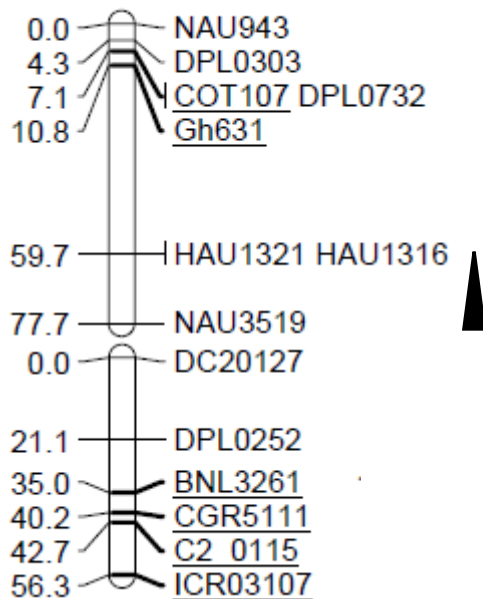

### Chr12 XZV

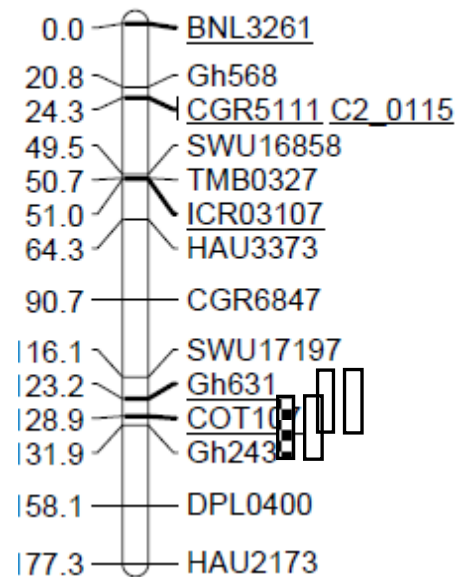



### Chr13 XZ

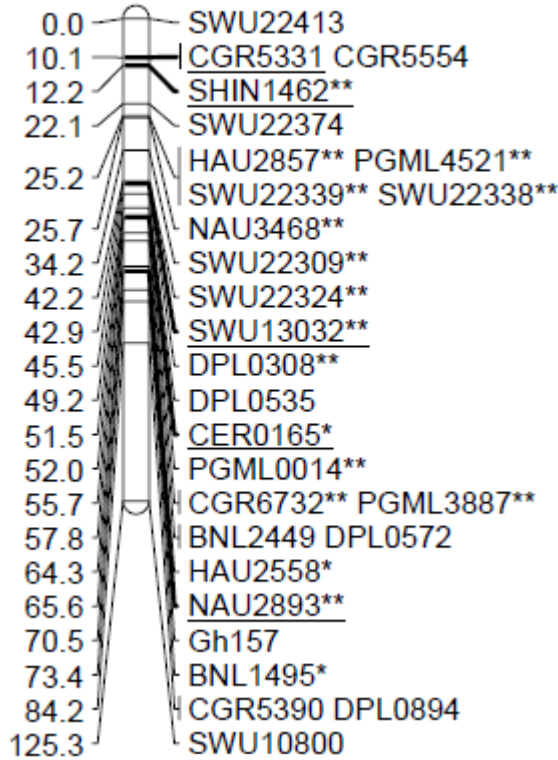

### Chr13 XZV

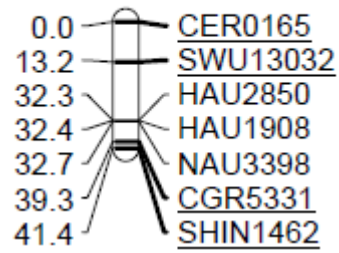

### Chr14 XZ

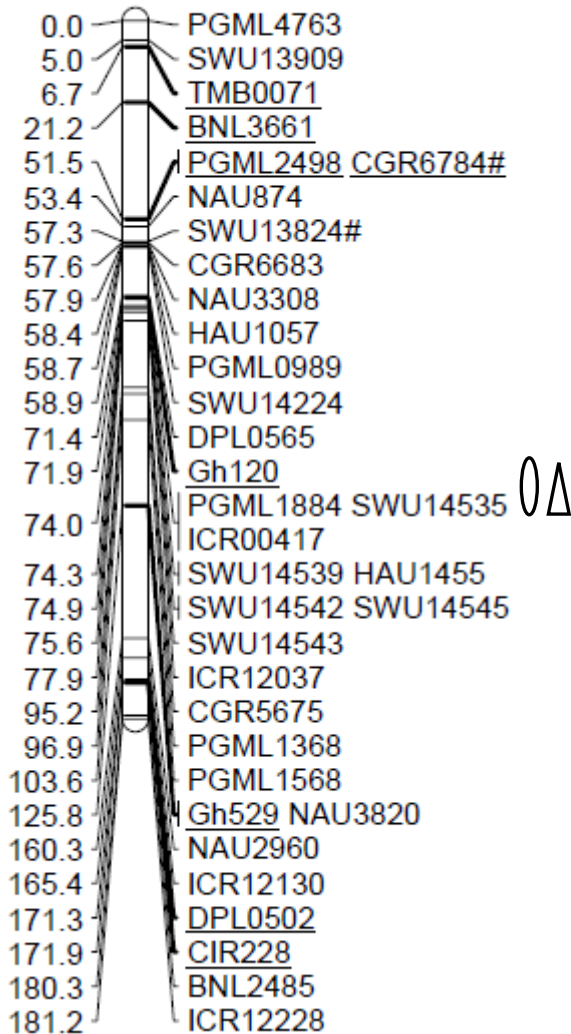

### Chr14 XZV

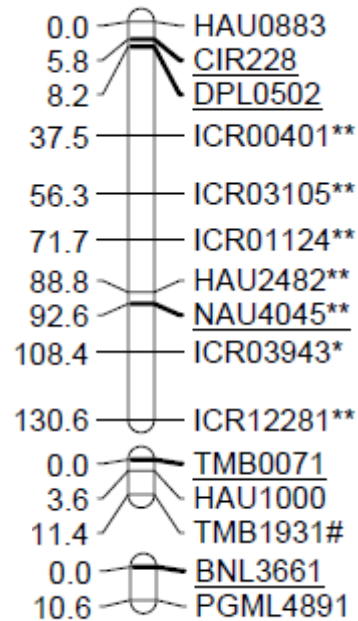

### Chr15 XZ

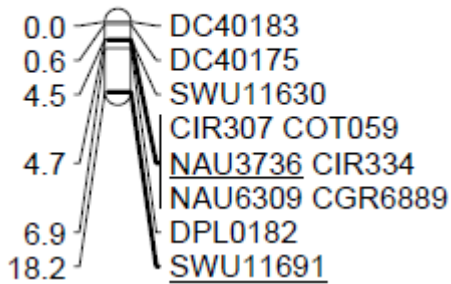

### Chr15 xzV

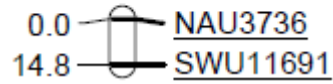

### Chr16 XZ

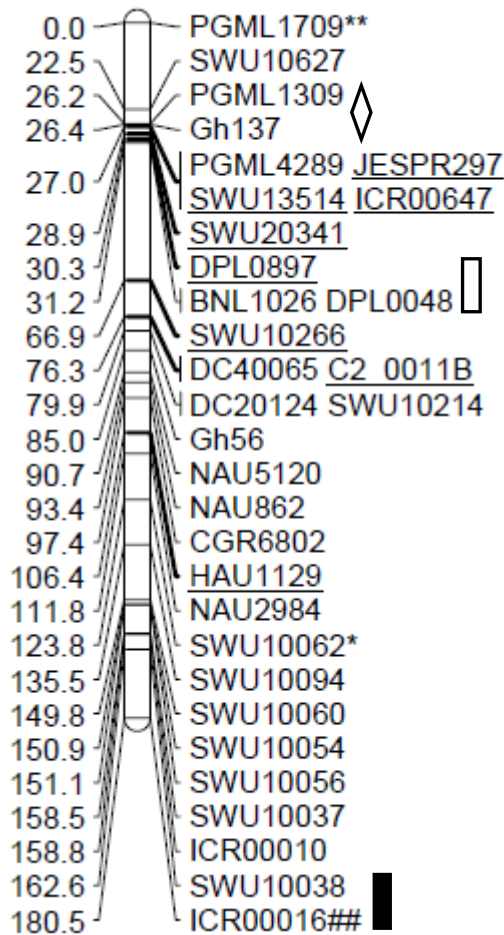

### Chr16 xzV

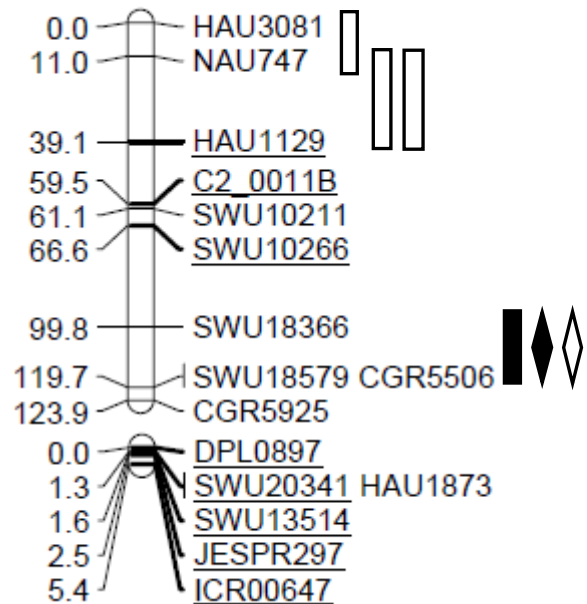

### Chr17 XZ

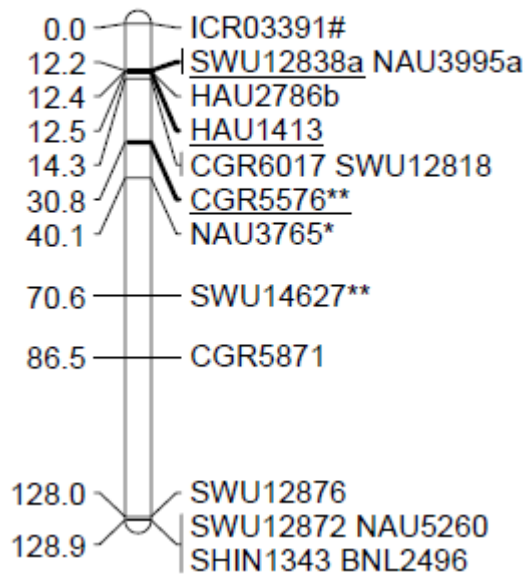

### Chr17 XZV

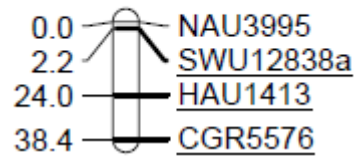

### Chr18 XZ

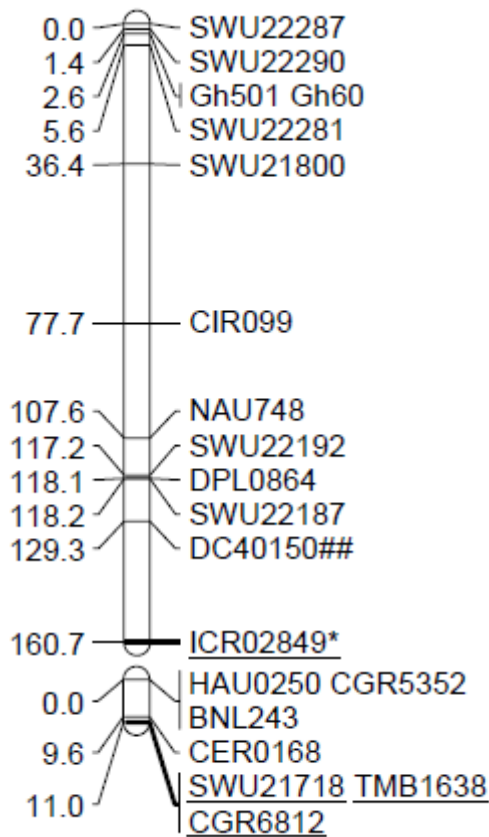

### Chr18 XZV

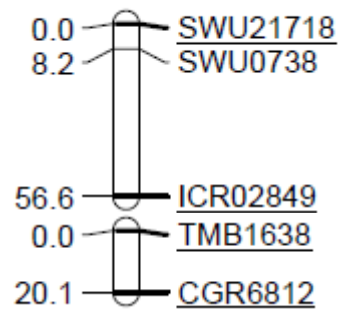

### Chr19 xZ

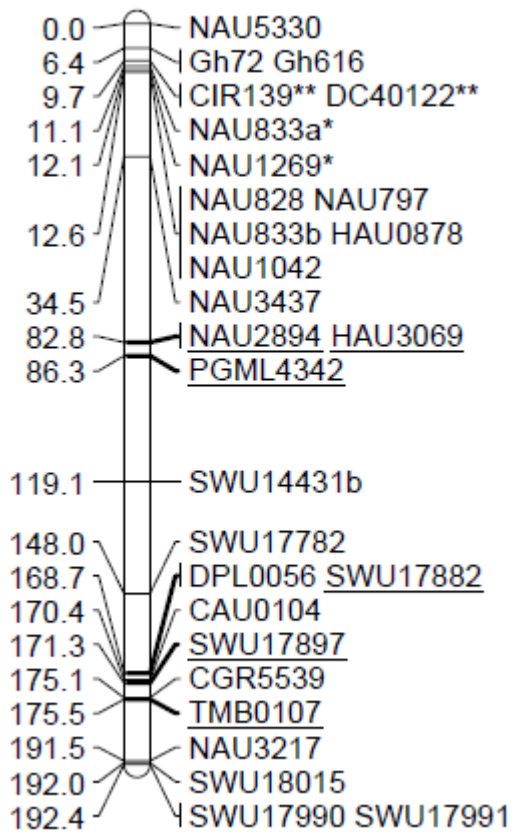

### Chr19 xZV

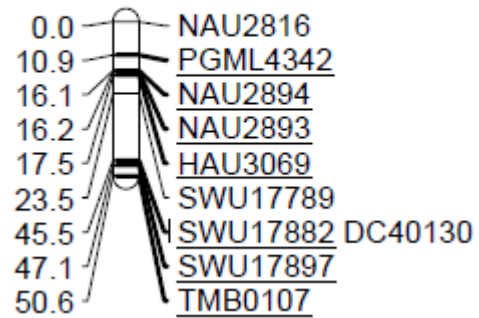

### Chr20 xZ

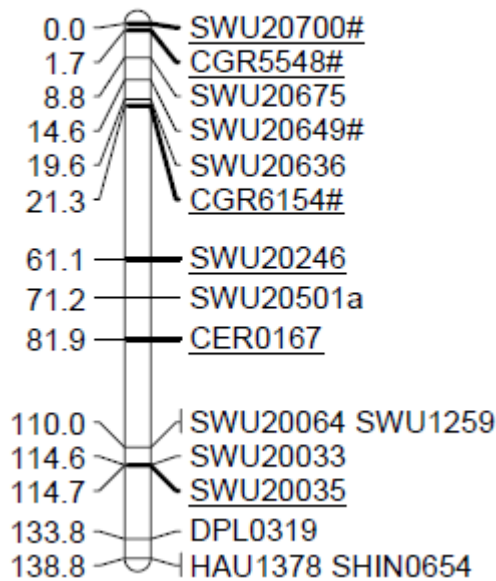

### Chr20 xZV

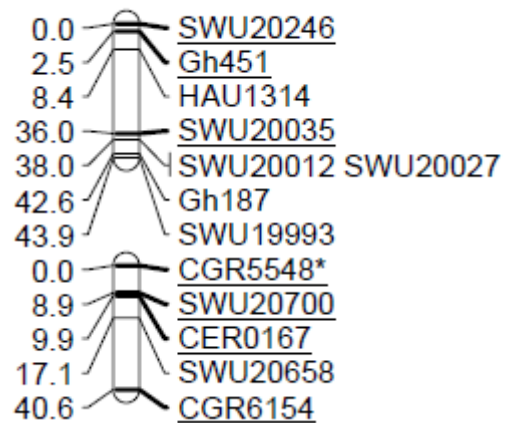

### Chr21 XZ

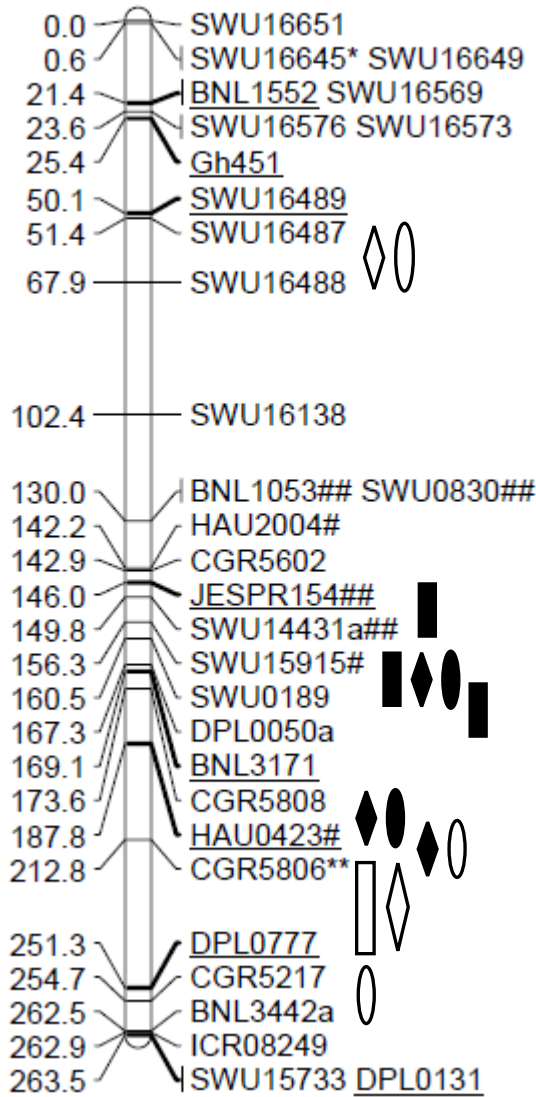

### Chr21 XZV

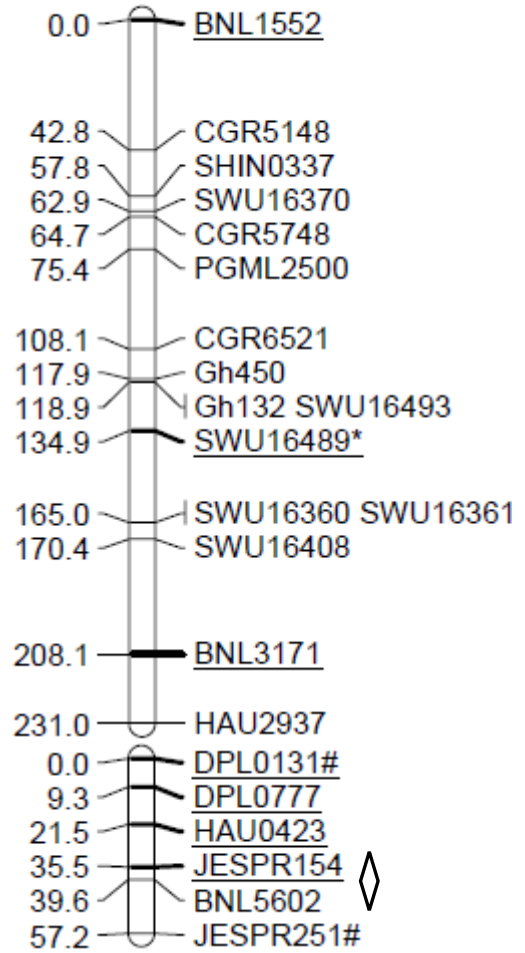

### Chr22 XZ

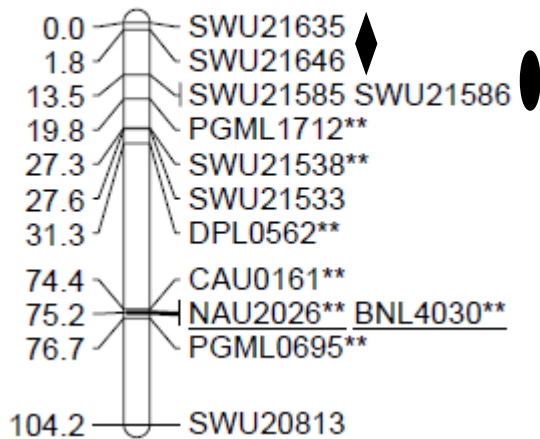

### Chr22 XZV

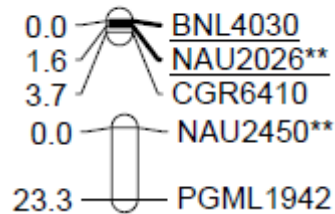

### Chr23 XZ

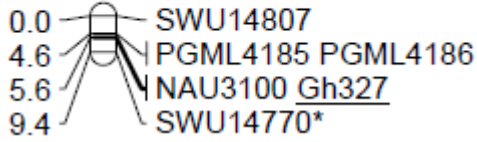

### Chr23 XZV

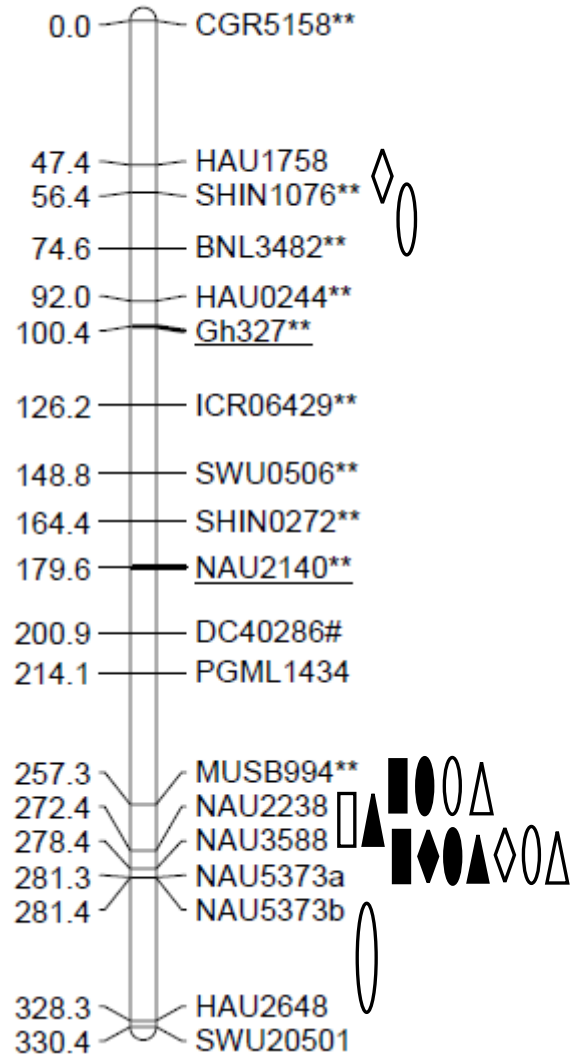

### Chr24 XZ

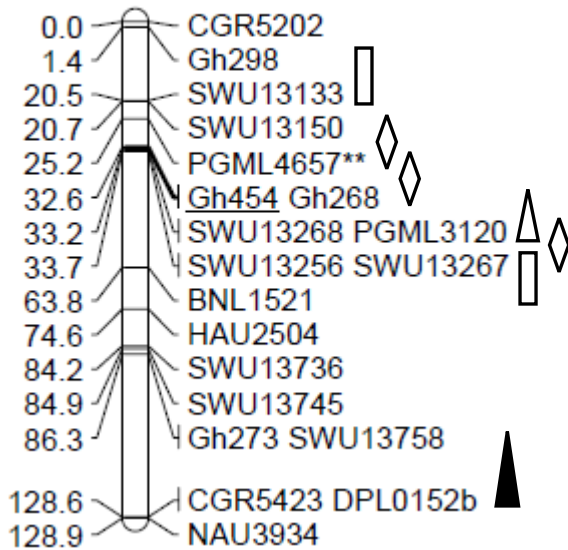

### Chr24 XZV

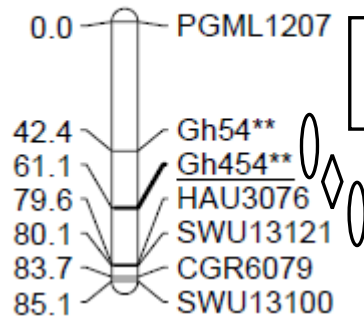

### Chr25 XZ

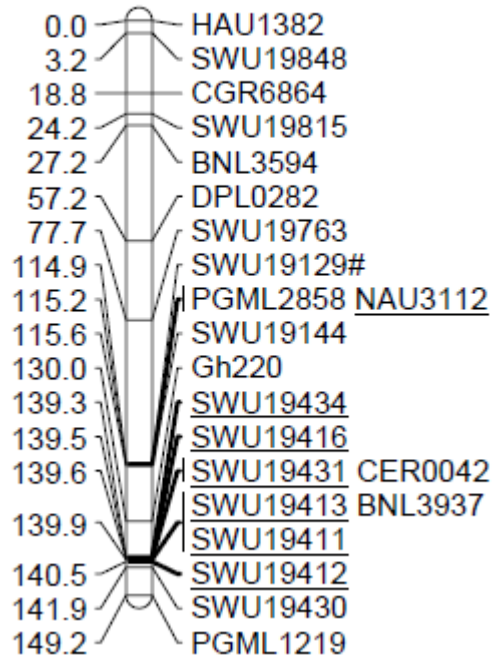

### Chr25 XZV

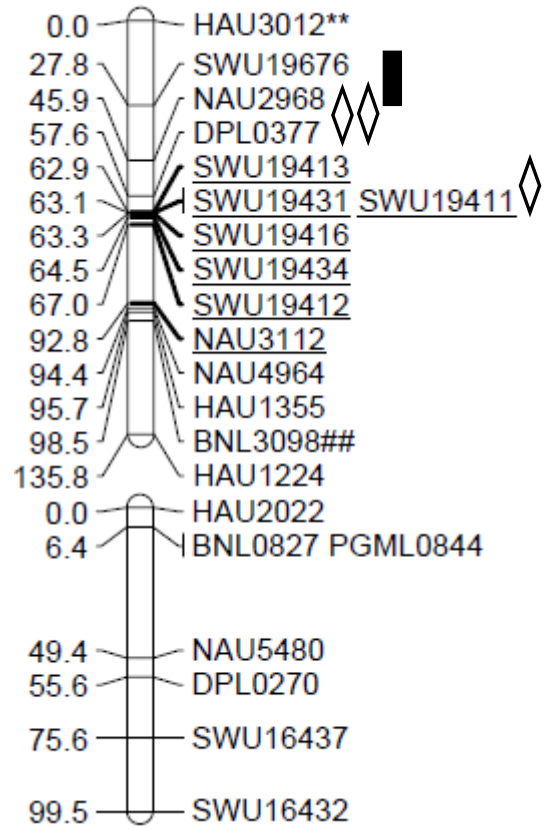

### Chr26 XZ

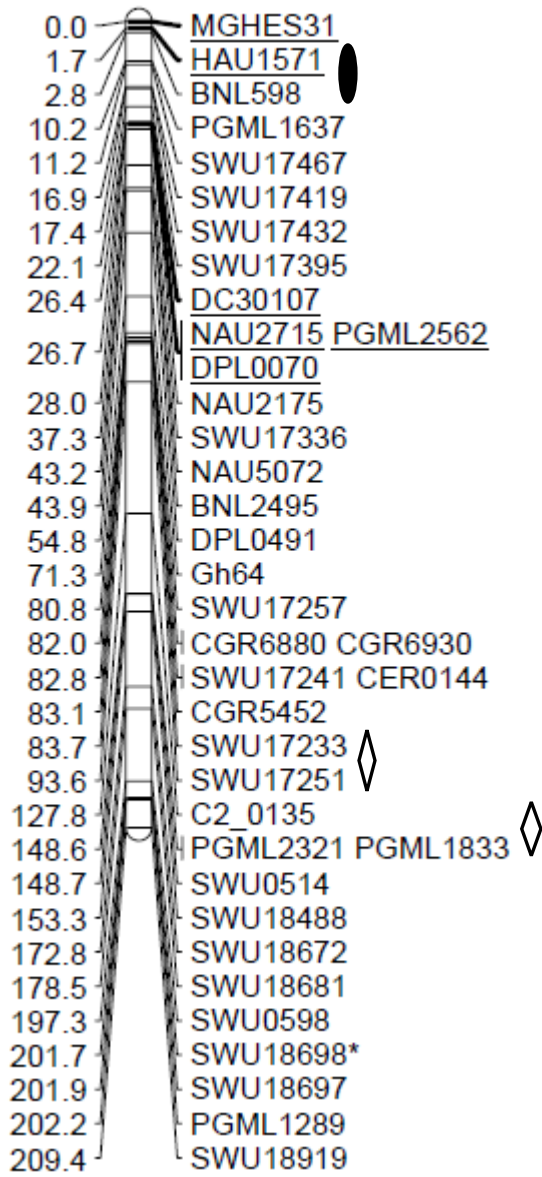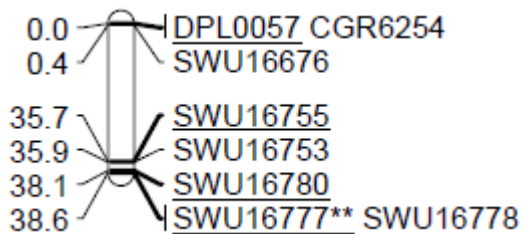

### Chr26 XZV

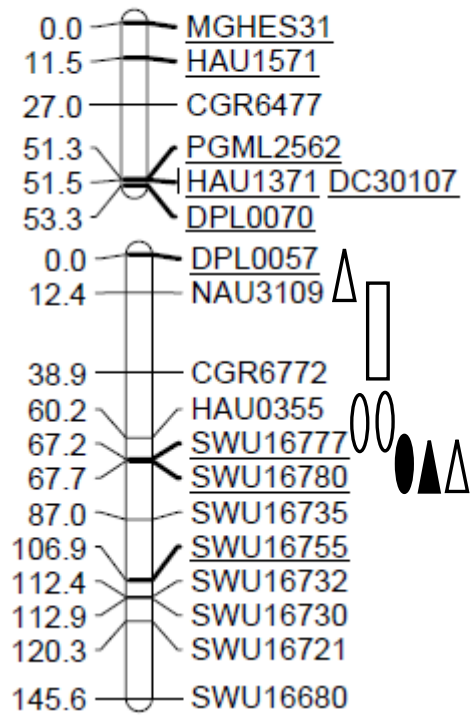



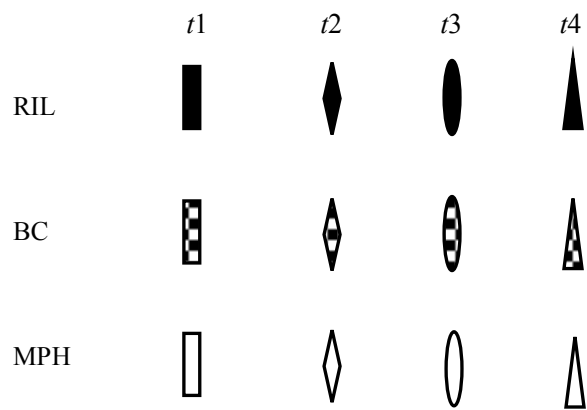

**Figure S1** Locations of QTLs controlling boll numbers per plant identified in two hybrids  
 \* and \*\*, segregation distortion significant at P = 0.05 and 0.01 levels, respectively.
